# Supplementary material for: A CuMoO4 nanocatalyst for Csp2–O cross-couplings; easy access to nitrofen derivatives
Source: Royal Society of Chemistry journal article supplement (doi:10.1039/d3nj04319c), 2023-12-01
Supplement: d3nj04319c1.pdf [file d3nj04319c1.pdf]

## **CuMoO<sub>4</sub> nano catalyst for Csp<sup>2</sup>-O cross-couplings; Easy access to nitrofen derivatives.**

### **1. Table of Content**

| Sl. | Details                                                          | Page    |
|-----|------------------------------------------------------------------|---------|
| 1   | Table of content                                                 | S1      |
| 2   | Materials                                                        | S2      |
| 3   | Instrumentation                                                  | S2      |
| 4   | General procedure for Csp <sup>2</sup> -O cross-coupling         | S3      |
| 5   | Characterization of ether product                                | S3-S11  |
| 6   | <sup>1</sup> H (proton) and <sup>13</sup> C (carbon) NMR spectra | S12-S69 |
| 7   | IR Spectra of New Compounds                                      | S70-S71 |
| 8   | IR Spectra of Recycled Catalyst                                  | S72     |

## 2. Materials:

All Solvents such as acetonitrile (99.8%), DMF (99.8%), 1,4-dioxane (99.8%), DMSO (99.9%), *t*-BuOH (99.5%), ethanol (99.8%) and toluene (99.8%) Are of analytical grade and were purchased from Merck and distilled before its use for reaction. Deuteriated NMR solvents CDCl<sub>3</sub> (99.8%) is purchased from Sigma-Aldrich. Cu(OAc)<sub>2</sub>·2H<sub>2</sub>O (purchased from Sigma-Aldrich), (NH<sub>4</sub>)<sub>6</sub>Mo<sub>7</sub>O<sub>24</sub>·4H<sub>2</sub>O (99.98%) were purchased from Sigma-Aldrich. All other solvents are purchased from Merck of high purity grade. DMF was sparged with nitrogen (N<sub>2</sub> gas) for 5 min at room temperature and stored under nitrogen atmosphere. K<sub>2</sub>CO<sub>3</sub> (99%), KO<sup>t</sup>Bu (99%), Cs<sub>2</sub>CO<sub>3</sub> (*Reagent Plus*®, 99%) and KOH (99%) were purchased from Sigma-Aldrich. Iodobenzene (98%), 4-methoxyiodobenzene (98%), 4-methyliodobenzene (99%), bromobenzene (98%), chlorobenzene (99.8%), 4-nitroiodobenzene (98%), 4-bromoacetophenone (99%) and all Phenols such as 4-chlorophenol (98%), 4-Bromophenol (98%), 4-methoxyphenol (99%) were purchased from Sigma-Aldrich and stored carefully.

## 3. Instrumentation:

NMR spectra were recorded on Bruker Avance III, 400 MHz (IISER Berhampur) and 500 MHz (University of Hyderabad) spectrometers in appropriate solvents CDCl<sub>3</sub> using TMS as internal standard or the solvent signals as secondary standards and the chemical shifts are shown in δ scales. The <sup>1</sup>H and <sup>13</sup>C NMR spectra were recorded at 400 MHz for <sup>1</sup>H and 100 MHz for <sup>13</sup>C NMR respectively. Deuterated solvents were purchased from Sigma-Aldrich and used as received. All <sup>1</sup>H NMR experiments are reported in δ units, parts per million (ppm), and were measured relative to the signals for residual chloroform (7.26 ppm) in the deuterated solvents. Data for <sup>1</sup>H NMR are reported as follows: chemical shift (δ ppm), multiplicity (s = singlet, d = doublet, t = triplet, q = quartet, p = quintet, m = multiplet, dd = doublet of doublets, dt = doublet of triplets...etc, br = broad), coupling constant (Hz) and integration. All <sup>13</sup>C NMR spectra are reported in ppm relative to CDCl<sub>3</sub> (77.0 ppm). 1,4-di iodobenzene was used as an internal standard for NMR yields from proton analysis. Elemental analysis was performed in 2400 Series II CHNS/O analyzer in CHNS mode. Flash column chromatography was performed by using a 90-120 times weight excess of flash silica gel 60-120 μm from Aldrich. Fractions were analyzed by TLC using TLC silica gel F254 250 μm pre-coated-plates from Merck and stains (permanganate, 2,4-dnp and CAM) was

used for UV-inactive compounds. Melting point is determined in Digital melting point apparatus, Electronics India (EI)-2935 model; Visualized through LCD Screen and is uncorrected by  $\pm 5$  °C. XPS is performed with Al-K $\alpha$  line at IIT Roorkee. HRMS is done at IISER Berhampur ESI mode.

#### 4. General Procedure for $Csp^2$ -O cross-coupling:

In N<sub>2</sub> atmosphere, CuMoO<sub>4</sub> (3 mol%, 6.7 mg), KOH (2 equiv., 112 mg), DMF (1 mL), aryl halide (1 mmol, 204 mg) and phenol (1.2 mmol, 112 mg) was taken in 5 mL vial and stirred for appropriate time at 100 °C. Reaction progress was monitored in TLC. After the completion of the reaction, it was worked-up with 5 mL cold water and 10 mL of dichloromethane (2  $\times$  10 mL). The organic layer was collected and concentrated. The crude product was subjected to flash chromatography. The isolated product was characterised by proton and carbon NMR.

##### 4.1. Catalytic Performance:

| Sl No. | Catalyst amount in (mol%) | Yield (%)            |
|--------|---------------------------|----------------------|
| 1      | 3                         | 90 (20h)             |
| 2      | 5                         | 90 (20h)             |
| 3      | 10                        | 90 (20h) and 86(16h) |

On increasing the catalyst dosage from the 3 mol% to 5 mol%, the resulted yield still constant. The reaction time is approximately same. However, in case of 10 mole % two consecutive reaction simultaneously putted one workup at 16 hr and the other workup at 20hr the resulted yield 86% and 90%.

#### 5. Characterization of diarylether products:

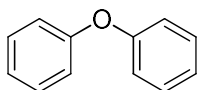

**1-phenoxybenzene (3a)**<sup>[20]</sup>: Colourless liquid, yield: 90% (77 mg).

<sup>1</sup>H NMR (400 MHz, CDCl<sub>3</sub>):  $\delta$  7.03-7.00 (m, 4 H), 7.12-7.07 (m, 2 H), 7.36-7.30 (m, 4 H).

<sup>13</sup>C NMR (100 MHz, CDCl<sub>3</sub>): 118.8, 123.2, 129.7, 157.2.

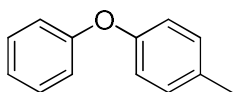

**1-methyl-4-phenoxybenzene(3b)**<sup>[20]</sup>: White solid, yield: 88% (80 mg), Mp: 102-106 °C

**<sup>1</sup>H NMR (400 MHz, CDCl<sub>3</sub>):** δ 2.25 (s, 3 H), 6.85 (t, J= 8 Hz, 2H), 6.91 (d, J=8 Hz, 2H), 6.98 (t, J=6 Hz, 1H), 7.07 (d, J=8 Hz, 2H), 7.23 (t, J=8 Hz, 2H).

**<sup>13</sup>C NMR (100 MHz, CDCl<sub>3</sub>):** 120.6, 118.3, 119.1, 122.7, 129.6, 130.2, 132.8, 154.7, 157.8,

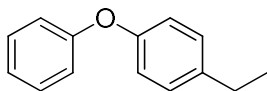

**1-ethyl-4-phenoxybenzene (3c)** <sup>[27]</sup>: Colourless liquid, yield: 90% (89mg)

**<sup>1</sup>H NMR (400 MHz, CDCl<sub>3</sub>):** δ 1.24(t, J = 8 Hz, 3H), 2.65 (q, J = 8 Hz, 2H), 6.95 (d, J = 8 Hz, 2H), 7.0(d, J = 8 Hz, 2H), 7.07 (t, J = 6 Hz, 1H), 7.17 (d, J = 8 Hz, 2H), 7.32(t, J = 8 Hz, 2H),

**<sup>13</sup>C NMR (100 MHz, CDCl<sub>3</sub>):**δ 15.7, 28.1, 118.4, 119.0, 122.8, 129.0, 129.6, 139.2, 154.8, 157.7.

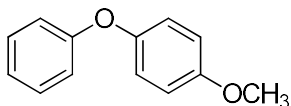

**1-(4-methoxyphenoxy)benzene(3d)** <sup>[20]</sup>: Yellow liquid, yield: 83% (83 mg).

**<sup>1</sup>H NMR (400 MHz, CDCl<sub>3</sub>):** δ 3.73 (s, 3 H), 6.79 (d, J=8 Hz, 2H), 6.89-6.86(m, 4H), 6.92 (t, J=6 Hz, 2H), 7.22 (t, J=8 Hz, 2H).

**<sup>13</sup>C NMR (100 MHz, CDCl<sub>3</sub>):** δ 55.6, 114.8, 117.5, 120.8, 122.4, 129.5, 150.1, 155.8, 158.5,

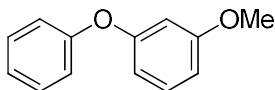

**1-methoxy-3-phenoxybenzene (3e)** <sup>[25]</sup>: Yellow oil, yield: 82% (82 mg)

**<sup>1</sup>H NMR (400 MHz, CDCl<sub>3</sub>):** δ 3.84(s, 3H), 6.66(d, J = 8 Hz, 2H), 6.70(d, J = 8 Hz, 1H), 7.10(d, J = 8 Hz, 2H), 7.17 (t, J = 8 Hz, 1H), 7.30(t, J = 8 Hz, 1H), 7.40(t, J = 8 Hz, 2H).

**<sup>13</sup>C NMR (100 MHz, CDCl<sub>3</sub>):**δ 55.3, 104.8, 108.4, 110.9, 119.0, 123.3, 129.7, 130.1, 158.4, 160.9,

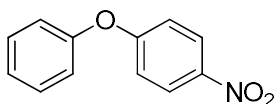

**1-nitro-4-phenoxybenzene (3f)** <sup>[21]</sup>: Yellow solid, yield: 95% (102 mg), Mp: 57-59 °C

**<sup>1</sup>H NMR (400 MHz, CDCl<sub>3</sub>):** 6.94(d, J=8 Hz, 2H), 7.02 (d, J=8 Hz, 2H), 7.18(d, J=8 Hz, 1H), 7.36 (d, J=8 Hz, 2H), 8.13 (d, J=8 Hz, 2H).



$^{13}\text{C}$  NMR (100 MHz,  $\text{CDCl}_3$ ): 117.0, 120.5, 125.3, 125.9, 130.2, 142.6, 154.6, 163.3,

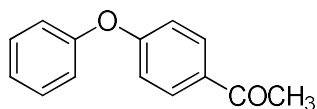

**1-(4-phenoxyphenyl)ethanone (3g)** <sup>[21]</sup>: Yellow solid, yield: 92% (98 mg), 47-52 °C

$^1\text{H}$  NMR (400 MHz,  $\text{CDCl}_3$ ):  $\delta$  2.57 (s, 3H), 7.01 (d,  $J=8$  Hz, 2H), 7.08, (d,  $J=8$  Hz, 2H), 7.20 (t,  $J=8$  Hz, 2H), 7.40 (t,  $J=8$  Hz, 2H), 7.95 (d,  $J=8$  Hz, 2H),

$^{13}\text{C}$  NMR (100 MHz,  $\text{CDCl}_3$ ):  $\delta$  26.4, 117.3, 120.2, 124.6, 130.0, 130.6, 131.9, 155.5, 161.9, 196.7,

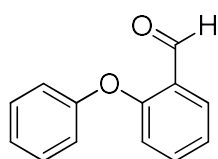

**2-phenoxybenzaldehyde (3h)** <sup>[23]</sup>: Colourless oil, yield: 82% (81mg)

$^1\text{H}$  NMR (400 MHz,  $\text{CDCl}_3$ ):  $\delta$  6.91 (d,  $J = 8$  Hz, 2H), 7.08 (d,  $J = 8$  Hz, 2H), 7.19(t,  $J = 8$  Hz, 2H), 7.40 (t,  $J = 8$  Hz, 2H), 7.51 (t,  $J = 8$  Hz, 1H), 7.73(d,  $J = 8$  Hz, 1H), 10.52(s, 1H),

$^{13}\text{C}$  NMR (100 MHz,  $\text{CDCl}_3$ ): $\delta$  118.4, 119.4, 123.3, 124.3, 128.4, 130.0, 135.7, 156.01, 159.7, 189.4.

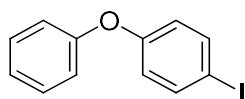

**1-iodo-4-phenoxybenzene (3i)** <sup>[25]</sup>: Yellow solid, yield: 85% (125 mg), Mp 129-134 °C.

$^1\text{H}$  NMR (400 MHz,  $\text{CDCl}_3$ ):  $\delta$  6.78 (d,  $J = 8$  Hz, 2H), 7.02 (d,  $J = 8$  Hz, 2H), 7.13 (t,  $J = 8$  Hz, 1H), 7.35 (t,  $J = 8$  Hz, 2H), 7.62(d,  $J = 8$  Hz, 2H),

$^{13}\text{C}$  NMR (100 MHz,  $\text{CDCl}_3$ ): $\delta$  85.8, 119.1, 120.8, 123.7, 129.8, 138.6, 156.5, 157.4,

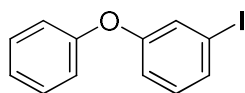

**1-iodo-3-phenoxybenzene (3j)** <sup>[32]</sup>: Colourless oil, yield: 79% (116 mg)

$^1\text{H}$  NMR (400 MHz,  $\text{CDCl}_3$ ):  $\delta$  7.07-6.96(m, 4H), 7.15 (t,  $J = 8$  Hz, 1H), 7.38-7.34(m, 3H), 7.44(d,  $J = 8$  Hz, 2H).

$^{13}\text{C}$  NMR (100 MHz,  $\text{CDCl}_3$ ): $\delta$  94.1, 117.9, 119.2, 123.9, 127.5, 129.9, 131.0, 132.1, 156.3, 158.0.

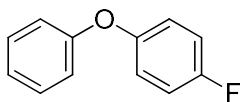

**1-fluoro-4-phenoxybenzene (3k)**<sup>[22]</sup> : Colourless oil, yield: 50% (46 mg)

**<sup>1</sup>H NMR (400 MHz, CDCl<sub>3</sub>):** δ 6.99 (d, J = 8 Hz, 2H), 7.12-7.06(m, 4H), 7.26-7.16(m, 1H), 7.35-7.31 (m, 2H).

**<sup>13</sup>C NMR (100 MHz, CDCl<sub>3</sub>):**δ 117.0, 117.3, 121.8, 123.1, 124.7, 129.6.

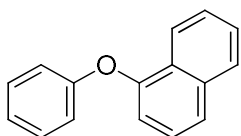

**1-phenoxyphenanthrene (3l)**<sup>[20]</sup> : Yellow liquid, yield: 92% (101 mg)

**<sup>1</sup>H NMR (400 MHz, CDCl<sub>3</sub>):** δ 6.95(d, J = 8.0 Hz, 1H), 7.04(d, J = 8.0 Hz, 2H), 7.11 (t, J = 8 Hz, 1H), 7.40-7.33(m, 3H), 7.55-7.47(m, 2H), 7.63(d, J = 8.0 Hz, 1H), 7.89 (d, J = 8 Hz, 1H), 7.22 (d, J = 8.0 Hz, 1H),

**<sup>13</sup>C NMR (100 MHz, CDCl<sub>3</sub>):**δ 113.4, 118.5, 122.1, 123.1, 123.3, 125.7, 125.9, 126.5, 127.7, 129.7, 134.9, 153.1, 157.8.

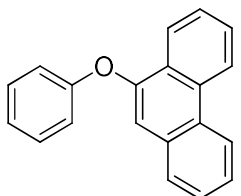

**9-phenoxyphenanthrene (3m)**<sup>[26]</sup> : White solid, yield: 78% (105 mg), Mp: 165-170 °C.

**<sup>1</sup>H NMR (400 MHz, CDCl<sub>3</sub>):** δ 7.20-7.13(m, 4H), 7.40 (t, J = 8 Hz, 2H), 7.61-7.55(m, 2H), 7.75-7.63(m, 3H), 8.33 (d, J = 8 Hz, 1H), 8.67(d, J = 8 Hz, 1H), 8.74(d, J = 8 Hz, 1H),

**<sup>13</sup>C NMR (100 MHz, CDCl<sub>3</sub>):**δ 111.4, 119.1, 122.5, 122.7, 123.5, 125.3, 126.9, 127.3, 127.6, 127.8, 129.8, 131.7, 132.2, 151.6, 157.3,

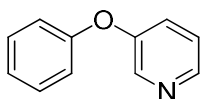

**3-phenoxy pyridine (3n)**<sup>[25]</sup> : White solid, yield: 90% (76mg), Mp – 262 °C.

**<sup>1</sup>H NMR (400 MHz, CDCl<sub>3</sub>):** δ 6.77(d, J = 8 Hz, 4H), 6.85 (t, J = 8 Hz, 2H), 7.17(t, J = 8 Hz, 4H).

$^{13}\text{C}$  NMR (100 MHz,  $\text{CDCl}_3$ ):  $\delta$  119.2, 120.1, 124.3, 127.0, 127.2, 127.8, 128.5, 129.1, 130.0, 144.6, 145.1, 151.0, 156.2.

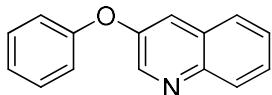

**3-phenoxyquinoline (3o)** <sup>[24]</sup>: White solid, yield: 86% (95mg)

$^1\text{H}$  NMR (400 MHz,  $\text{CDCl}_3$ ):  $\delta$  7.01 (d,  $J$  = 8 Hz, 2H), 7.10(t,  $J$  = 8 Hz, 1H), 7.31 (t,  $J$  = 6 Hz, 2H), 7.42-7.39(m, 2H), 7.57-7.50(m, 2H), 8.02(d,  $J$  = 8 Hz, 1H), 8.72 (s, 1H).

$^{13}\text{C}$  NMR (100 MHz,  $\text{CDCl}_3$ ):  $\delta$  119.2, 120.1, 124.3, 127.0, 127.2, 127.8, 128.5, 129.1, 130.0, 144.6, 145.1, 151.0, 156.2.

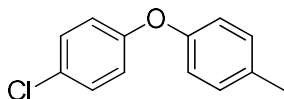

**1-(4-chlorophenoxy)-4-methylbenzene(3p)** <sup>[30]</sup>: White solid, yield: 82% (90 mg).

$^1\text{H}$  NMR (400 MHz,  $\text{CDCl}_3$ ):  $\delta$  2.27 (s, 3H), 6.84(d,  $J$  = 8.0 Hz, 4H), 7.09 (d,  $J$  = 12 Hz, 2H), 7.19 (t,  $J$  = 6.0 Hz, 3H),

$^{13}\text{C}$  NMR (100 MHz,  $\text{CDCl}_3$ ):  $\delta$  20.7, 119.1, 119.1, 119.4, 127.7, 129.5, 130.3, 133.3, 154.3, 156.5,

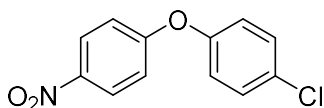

**1-chloro-4-(4-nitrophenoxy)benzene (3r)** <sup>[31]</sup>: Yellow solid, yield: 91% (113mg), Mp :79-84 °C

$^1\text{H}$  NMR (400 MHz,  $\text{CDCl}_3$ ):  $\delta$  7.05-7.00(m, 4H), 7.43(d,  $J$  = 12 Hz, 2H), 8.22(d,  $J$  = 8 Hz, 2H).

$^{13}\text{C}$  NMR (100 MHz,  $\text{CDCl}_3$ ):  $\delta$  117.1, 121.7, 126.0, 130.3, 142.9, 153.3, 162.8.

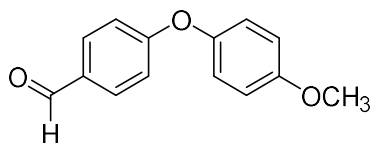

**4-(4-methoxyphenoxy)benzaldehyde (3s)** <sup>[23]</sup>: Solid, Yield: 90% (102 mg), Mp – 62 °C

$^1\text{H}$  NMR (400 MHz,  $\text{CDCl}_3$ ):  $\delta$  3.83(s, 3H), 6.95(d,  $J$  = 8 Hz, 2H), 7.04-6.99 (m, 4H), 7.83(d,  $J$  = 8 Hz, 2H), 9.90(s, 1H).

$^{13}\text{C}$  NMR (100 MHz,  $\text{CDCl}_3$ ):  $\delta$  156.6, 115.1, 116.7, 121.8, 130.8, 131.9, 148.1, 156.8, 164.1, 190.7.

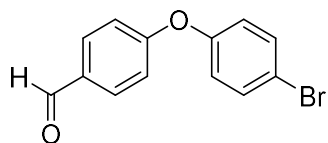

**4-(4-bromophenoxy)benzaldehyde (3t)** <sup>[23]</sup>: Light yellow Solid, Yield: 88%(121 mg), Mp 68-73 °C

<sup>1</sup>H NMR (400 MHz, CDCl<sub>3</sub>): δ 6.91(d, J = 8 Hz, 2H), 7.00(d, J = 8 Hz, 2H), 7.45(d, J = 8 Hz, 2H), 7.80(d, J = 8 Hz, 2H), 9.86(s, 1H).

<sup>13</sup>C NMR (100 MHz, CDCl<sub>3</sub>): δ 117.6, 117.7, 122.0, 131.6, 131.9, 133.1, 154.3, 162.5, 190.6.

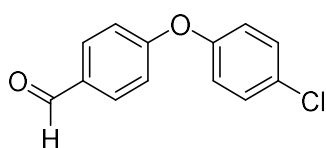

**4-(4-chlorophenoxy)benzaldehyde (3u)** <sup>[23]</sup>: Yellow solid, yield: 82% (96 mg), Mp 56-60 °C

<sup>1</sup>H NMR (400 MHz, CDCl<sub>3</sub>): δ 7.13-7.01 (m, 6H), 7.85(d, J = 8 Hz, 2H), 9.92(s, 1H),

<sup>13</sup>C NMR (100 MHz, CDCl<sub>3</sub>): δ 116.6, 116.9, 117.1, , 121.9, 122.0, 131.3, 131.9, 150.8, 158.4, 160.9, 163.3, 190.69.

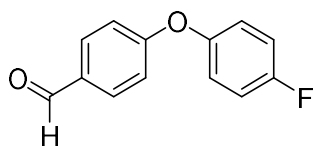

**4-(4-fluorophenoxy)benzaldehyde (3v)** <sup>[23]</sup> : White Solid, Yield: 72% (78 mg), Mp: 74-78 °C

<sup>1</sup>H NMR (400 MHz, CDCl<sub>3</sub>): δ 7.11-7.02 (m, 6H), 7.86(d, J = 8 Hz, 2H), 9.92(s, 1H).

<sup>13</sup>C NMR (100 MHz, CDCl<sub>3</sub>): δ 116.6, 117.1, 121.9, 122.0, 131.3, 131.9, 150.8, 158.4, 160.9, 190.69.

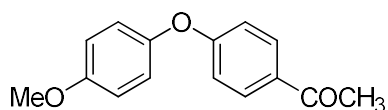

**1-(4-(4-methoxyphenoxy)phenyl)ethanone (3w)** <sup>[29]</sup>: White Solid , yield: 87% (105 mg), Mp: 56- 59 °C

<sup>1</sup>H NMR (400 MHz, CDCl<sub>3</sub>): δ 2.55 (s, 3H), 3.81 (s, 3H), 6.95-6.91 (m, 4H), 7.0(d, J = 9.0 Hz, 2H), 7.92 (d, J = 9.0 Hz, 2H),

<sup>13</sup>C NMR (100 MHz, CDCl<sub>3</sub>): 26.3, 55.5, 115.3, 116.2, 121.6, 130.5, 131.3, 148.4, 156.6, 162.8, 196.6,

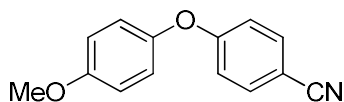

**4-(4-methoxyphenoxy)benzonitrile (3x)** <sup>[28]</sup>: Yellow solid, yield: 20% (23 mg), Mp: 142-146 °C.

<sup>1</sup>H NMR (400 MHz, CDCl<sub>3</sub>): δ 3.82 (s, 3H), 6.94 (dd, J = 8.0, 7.2 Hz, 4H), 7.01 (d, J = 8 Hz, 2H), 7.57 (d, J = 8.0 Hz, 2H),

<sup>13</sup>C NMR (100 MHz, CDCl<sub>3</sub>): δ 55.5, 105.1, 115.1, 117.0, 118.8, 121.7, 134.0, 147.7, 156.9, 162.4,

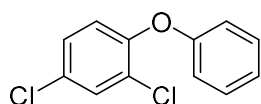

**2,4-dichloro-1-phenoxybenzene (5a)** <sup>[33]</sup>: Liquid, Yield 82 % (97 mg)

<sup>1</sup>H NMR (400 MHz, CDCl<sub>3</sub>): δ 6.84 (d, J = 8.7 Hz, 1H), 6.84 (d, J = 8.7 Hz, 1H), 6.89 (d, J = 8.1 Hz, 2H), 7.05 (t, J = 7.4 Hz, 1H), 7.11 (d, J = 8.7 Hz, 1H), 7.27 (t, J = 7.5 Hz, 2H), 7.40 (s, 1H),

<sup>13</sup>C NMR (100 MHz, CDCl<sub>3</sub>): <sup>13</sup>C NMR (101 MHz, CDCl<sub>3</sub>) δ 156.6, 151.5, 130.5, 129.91, 129.2, 128.1, 126.6, 123.7, 121.4, 118.1, 29.7.

(*Org. Lett.* 2004, 6, 6, 913–916)

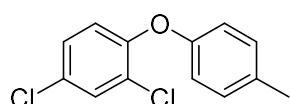

**2,4-dichloro-1-(p-tolyloxy)benzene (5b)**: Yellow Liquid, Yield 76% (96 mg)

<sup>1</sup>H NMR (400 MHz, CDCl<sub>3</sub>) δ 2.26 (s, 3H), 6.78 (dd, J = 8.5, 5.2 Hz, 3H), 7.07 (dd, J = 8.4, 4.6 Hz, 3H), 7.37 (d, J = 2.4 Hz, 1H).

<sup>13</sup>C NMR (100 MHz, CDCl<sub>3</sub>) δ 162.1, 148.9, 143.1, 131.7, 131.0, 128.7, 127.9, 126.1, 123.7, 116.3, 29.7.

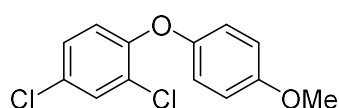

**2,4-dichloro-1-(4-methoxyphenoxy)benzene (5c)** <sup>134</sup>: Yellow Liquid, Yield 88% (118 mg)

<sup>1</sup>H NMR (400 MHz, CDCl<sub>3</sub>) : δ 7.37 (d, *J* = 2.4 Hz, 1H), 7.19 (s, 1H), 7.06 (dd, *J* = 8.8, 2.4 Hz, 1H), 6.90 – 6.84 (m, 2H), 6.84 – 6.79 (m, 2H), 6.71 (d, *J* = 8.8 Hz, 1H), 3.73 (s, 3H).

<sup>13</sup>C NMR (100 MHz, CDCl<sub>3</sub>) δ 155.2 , 151.7, 148.6, 129.3, 126.8, 124.4, 119.1, 118.5, 113.9, 54.6, 28.7.

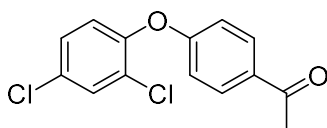

**1-(4-(2,4-dichlorophenoxy) phenyl)ethan-1-one (5d)** : Viscos Liquid, Yield 88% (124mg)

<sup>1</sup>H NMR (400 MHz, CDCl<sub>3</sub>) δ 7.88 (d, *J* = 8.7 Hz, 2H), 7.44 (d, *J* = 2.4 Hz, 1H), 7.24 – 7.19 (m, 1H), 6.98 (d, *J* = 8.7 Hz, 1H), 6.87 (d, *J* = 8.7 Hz, 2H), 2.50 (s, 3H).

<sup>13</sup>C NMR (101 MHz, CDCl<sub>3</sub>) δ 196.6, 160.9, 149.7, 132.4, 130.8, 128.5, 127.7 , 123.2, 116.4, 29.7, 26.5.

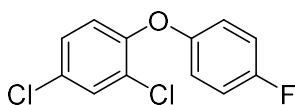

**2,4-dichloro-1-(4-fluorophenoxy)benzene (5e)** : Yellow Liquid, Yield 80% (102mg)

<sup>1</sup>H NMR (400 MHz, CDCl<sub>3</sub>) : δ 7.39 (d, *J* = 2.5 Hz, 1H), 7.11 (dd, *J* = 8.8, 2.5 Hz, 1H), 6.97 (t, *J* = 8.5 Hz, 2H), 6.90 – 6.82 (m, 2H), 6.78 (d, *J* = 8.8 Hz, 1H).

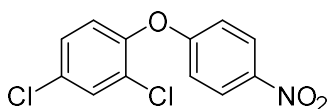

**2,4-dichloro-1-(4-nitrophenoxy)benzene (5f)** : Yellow Liquid, Yield 90% (128mg)

<sup>1</sup>H NMR (400 MHz, CDCl<sub>3</sub>) : δ 8.13 (d, *J* = 9.2 Hz, 2H), 7.44 (d, *J* = 2.3 Hz, 1H), 7.24 (dd, *J* = 8.7, 2.4 Hz, 1H), 7.03 (d, *J* = 8.7 Hz, 1H), 6.88 (d, *J* = 9.2 Hz, 2H).

<sup>13</sup>C NMR (101 MHz, CDCl<sub>3</sub>) δ <sup>13</sup>C NMR (101 MHz, CDCl<sub>3</sub>) : δ 162.1, 148.9, 143.1, 131.7, 131.0, 128.7, 127.9, 126.0, 123.7, 116.4, 29.7.

## References:

20. S. Jammi, S. Sakthivel, L. Rout, T. Mukherjee, S. Mandal, R. Mitra, P. Saha, T. Punniyamurthy, *J. Org. Chem.* **2009**, *74* 1971-1976.
21. B. Sreedhar, R. Arundhathi, P. L. Reddy, and M. L. Kantam,; *J. Org. Chem.* **2009**, *74*, 7951–7954.
22. M. A. Khalilzadeh, A. Hosseini, A. Pilevar, *Eur. J. Org. Chem.* **2011**, *8*, 1587-1592.
23. J. Zhang, J. Chen, M. Liu, X. Zheng, J. Ding, H. Wu, *Green Chem.* **2012**, *14*, 912-916.
24. L. Salvi, N. R. Davis, S. Z. Ali, S. L. Buchwald, *Org. Lett.* **2012**, *14*, 170-173
25. N. Jalalian, E. E. Ishikawa, L. F. Silva, J. B. Olofsson, *Org. Lett.* **2011**, *13*, 1552-1555
26. Y. Chen, N. Zhang, L. Ye, J. Chen, X. Sun, X. Zhang M. Yan, *RSC Adv.* **2015**, *5*, 48046-48049
27. S. E. Sloane, A. Reyes, Z. Pa Vang, L. Li, Kiera T. Behlow, and Joseph R. Clark,; *Org. Lett.* **2020**, *22*, 9139-9144.
28. M. P. Drapeau, T. Ollevier, M. Taillefer,; *Chemistry A – Euro. J.* **2014**, *20*, 53-58.
29. S. Yang, C. Wu, Hua Zhou, Y. Yang, Y. Zhao, C. Wang, W. Yang, J. Xu,; *Adv. Synth. Catal.* **2013**, *355*, 53-58.
30. Y. Chen, Y. Gu, H. Meng, Q. Shao, Z. Xu, W. Bao, Y. Gu, X.-S. Xue, Y. Zhao, *Angew. Chem. Int. Ed. Eng.* **2022**, *61*, e202201240.
31. Q.-Q. Yang, N. Liu, J.-Y. Yan, Z.-L. Ren, L. Wang, *Asian J. Org. Chem.*, **2020**, *9*, 116-120.
32. J. Zhao and R. C. Larock,; *J. Org. Chem.* **2006**, *71*, 5340-5348.
33. S. A. M. Mashhadi, M. Z. Kassae, *Appl Organometal Chem.* **2019**, *33*, e5042.
34. D.-Y. Wang, Z.-K. Yang, C. Wang, A. Zhang, M. Uchiyama, *Angew. Chem. Int. Ed. Eng.* **2018**, *57*, 3641-3645

**Selected Proton (400 MHz)  
and  
Carbon NMR (100 MHz) Spectra**



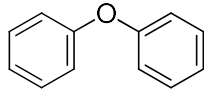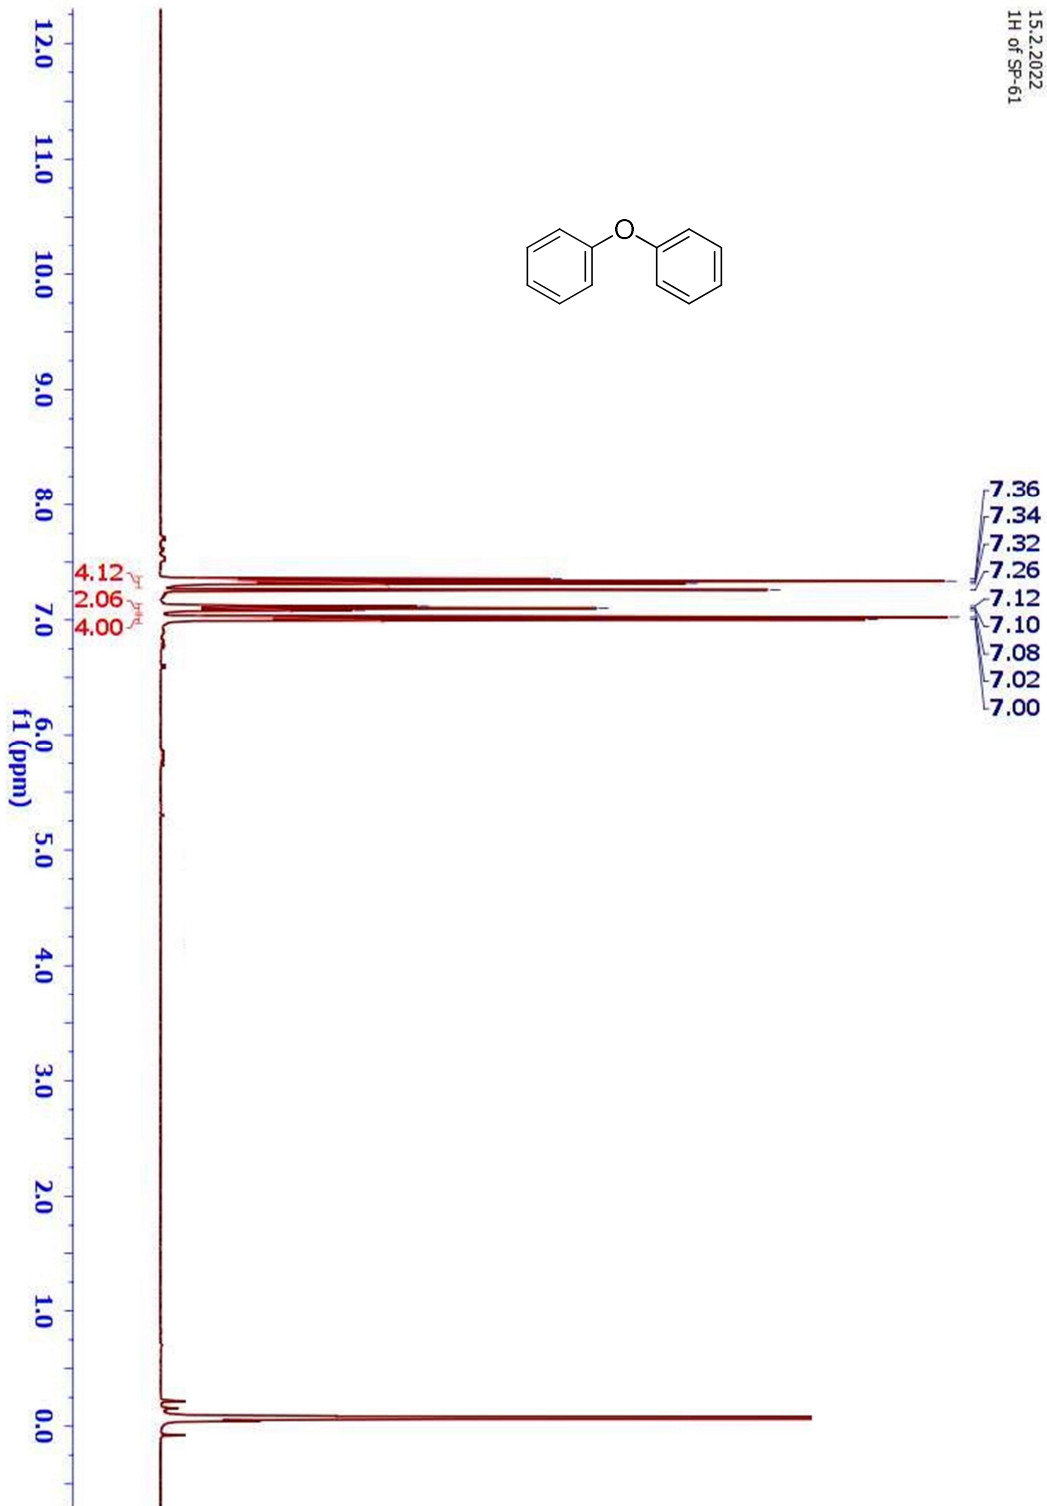

22.8.2022  
13C of P-61

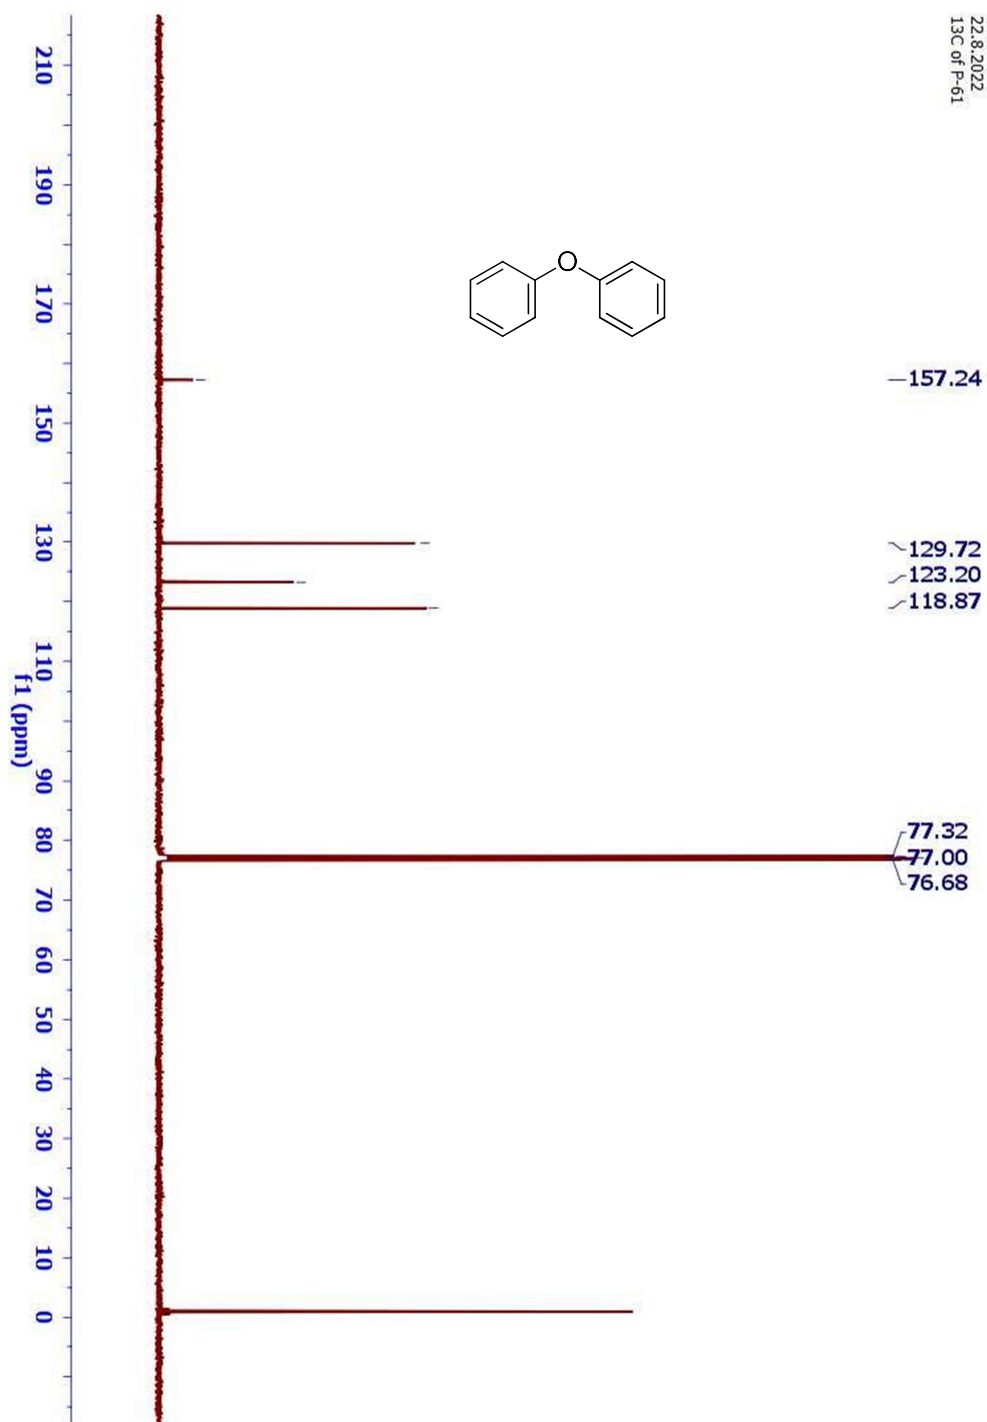

21.3.2022  
1H of SP-73

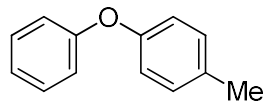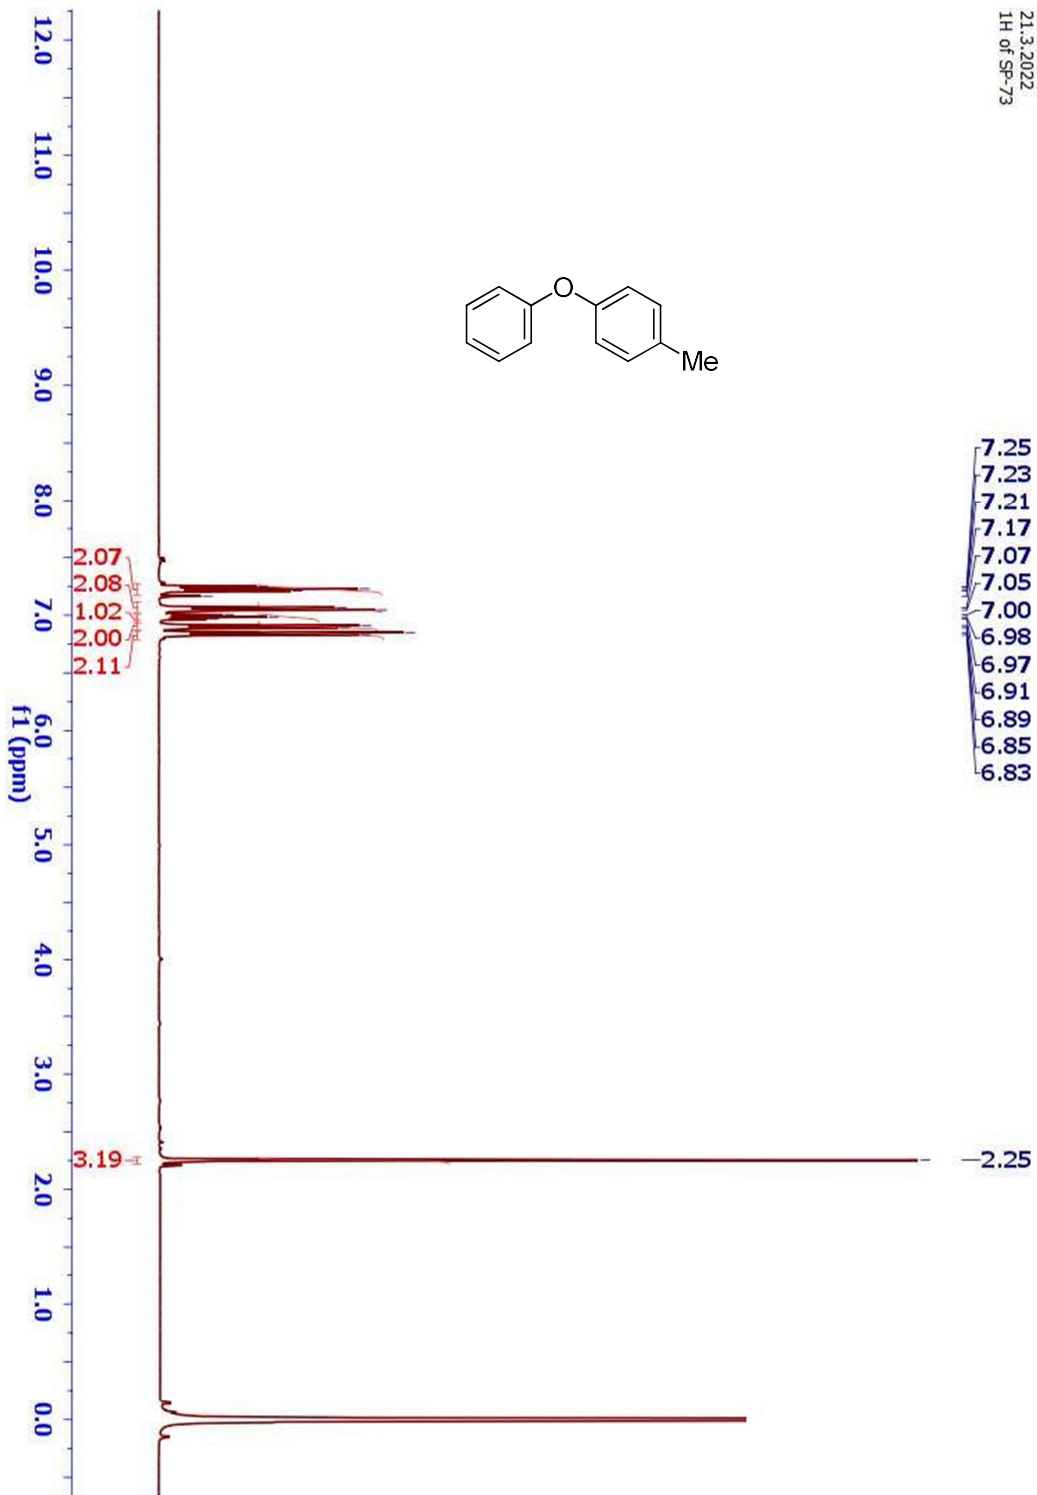

5.8.2022  
13C of SP-73

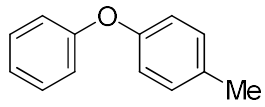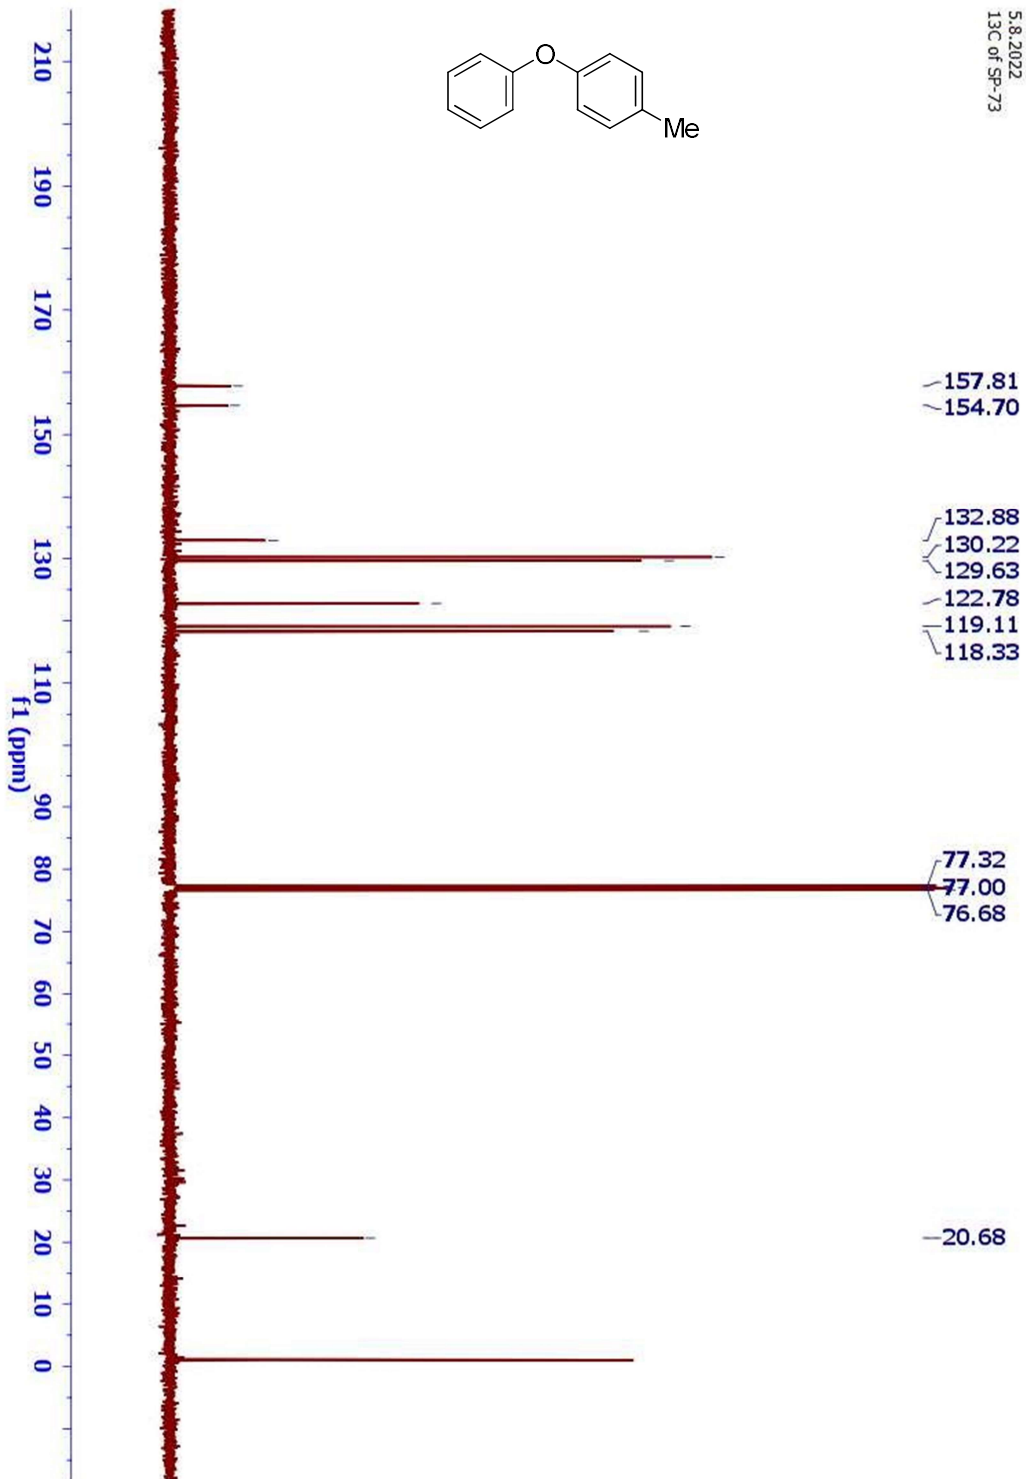

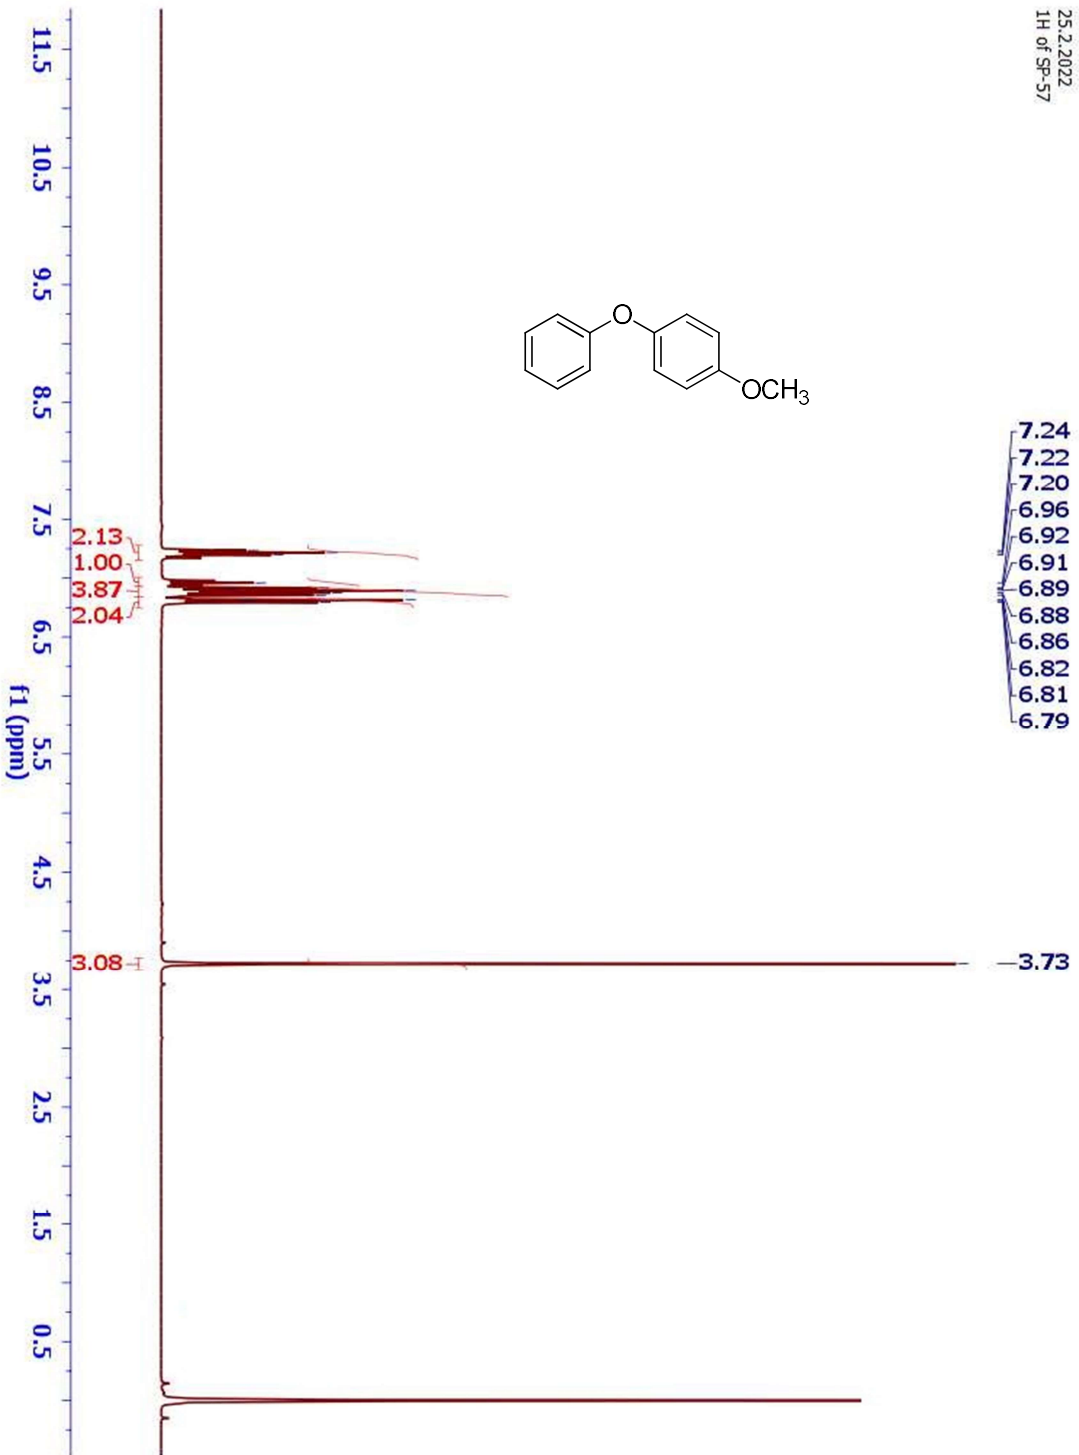

22.8.2022  
13C of SP-57

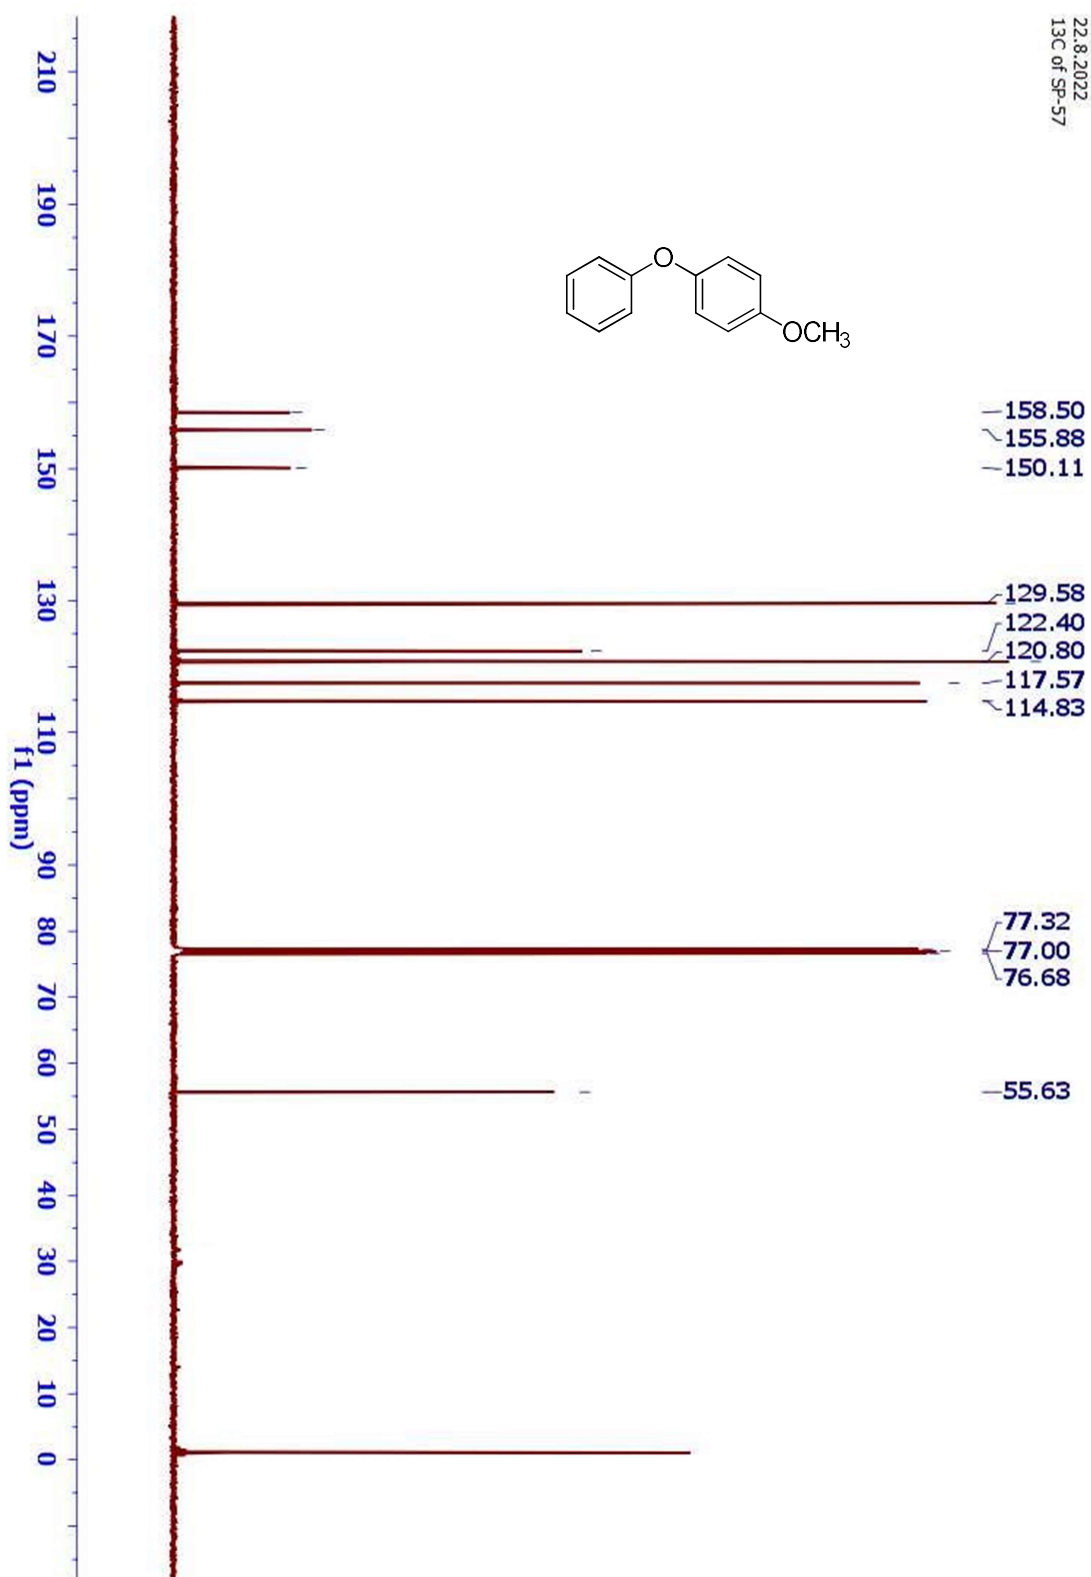

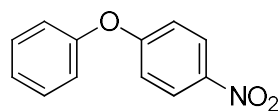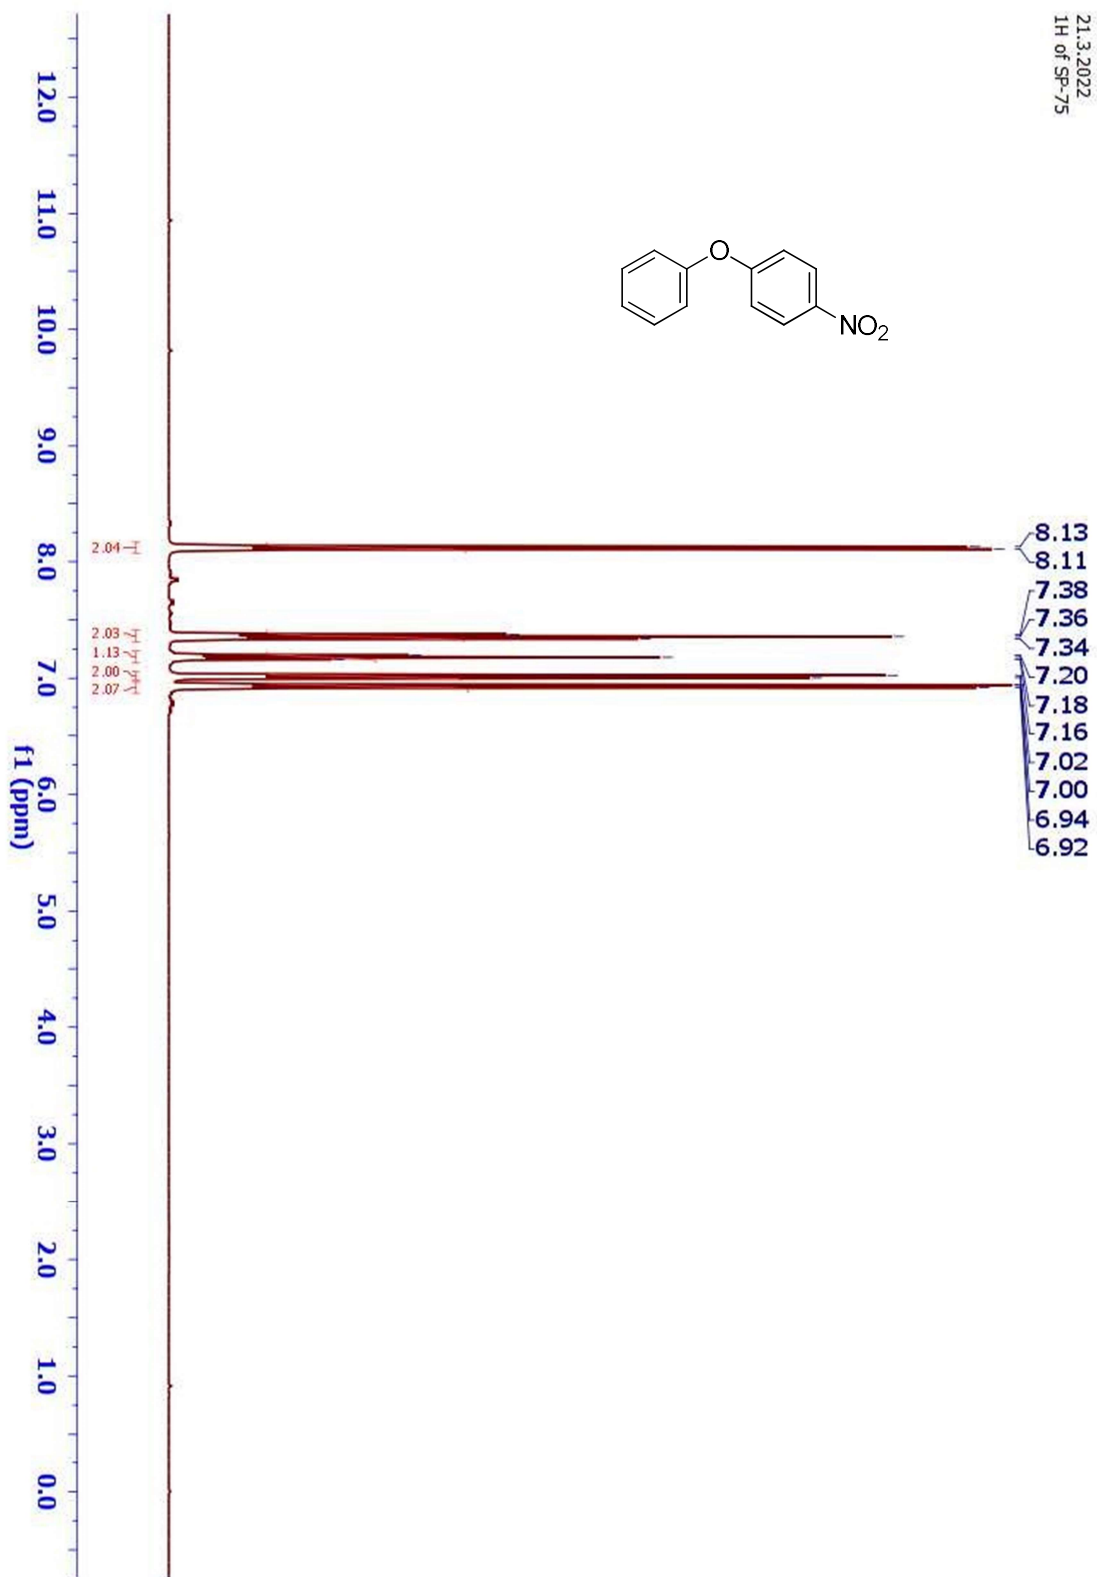

5.8.2022  
13C of SP-75

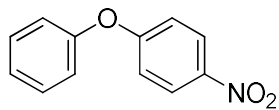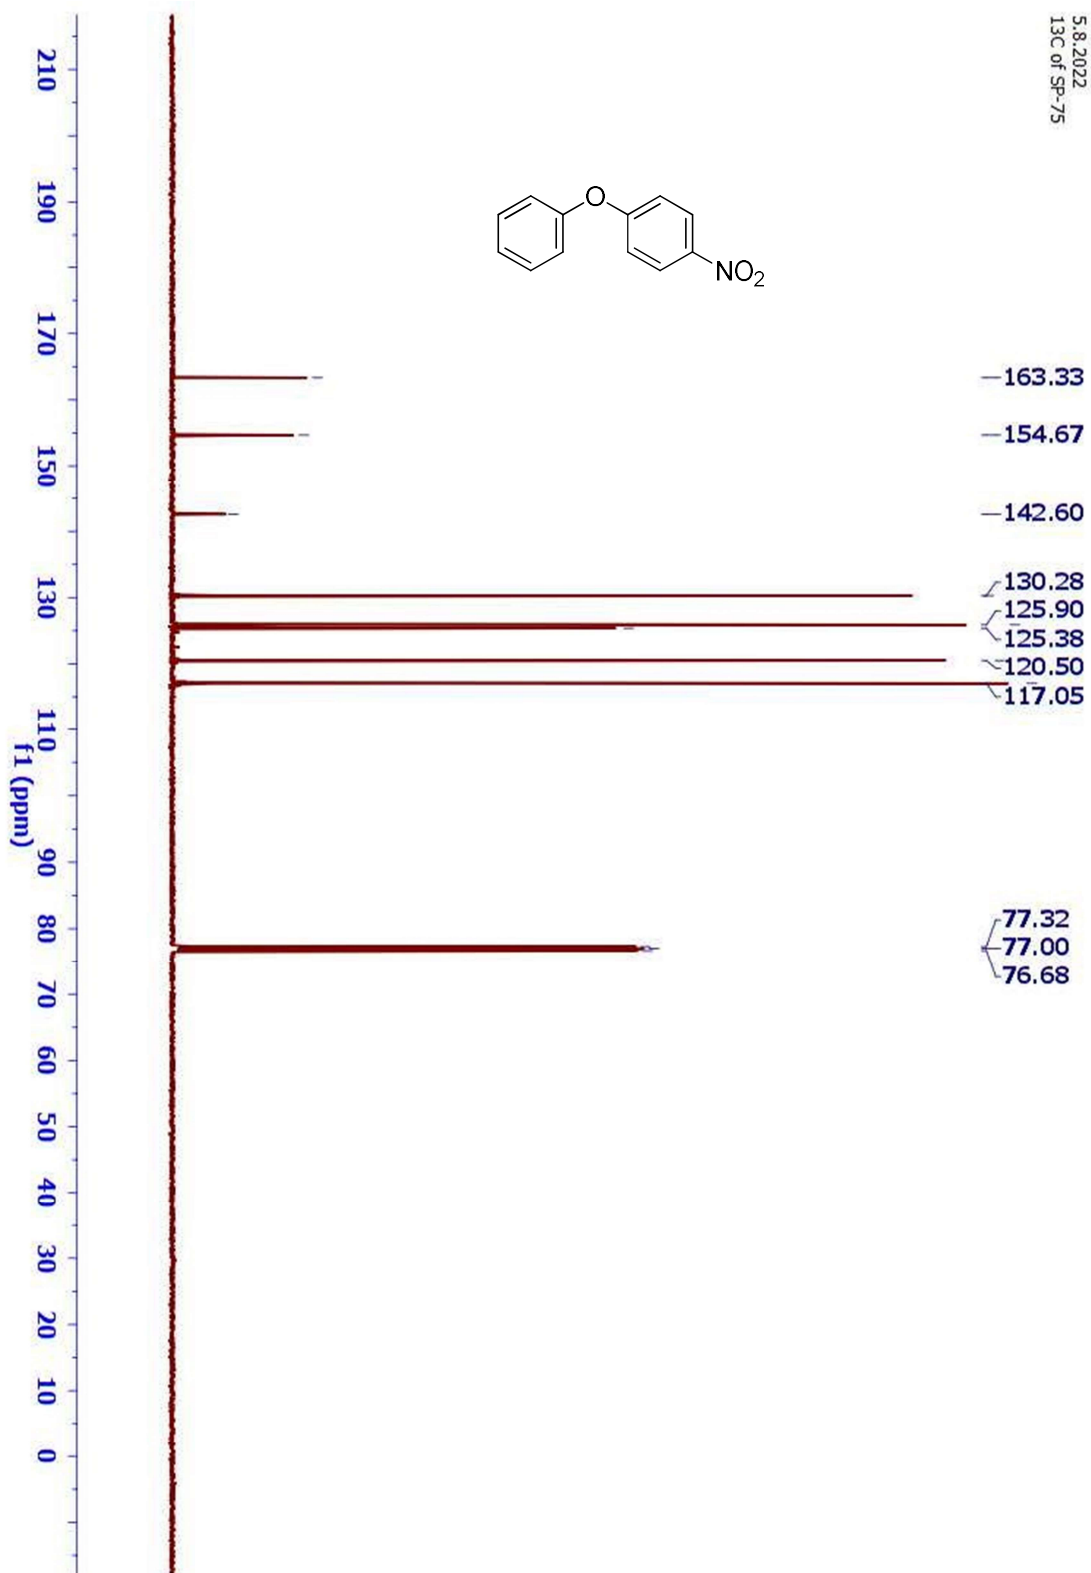



NMR Data C-0  
1H of Sp-85

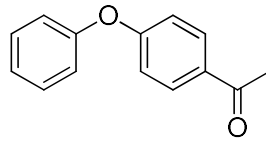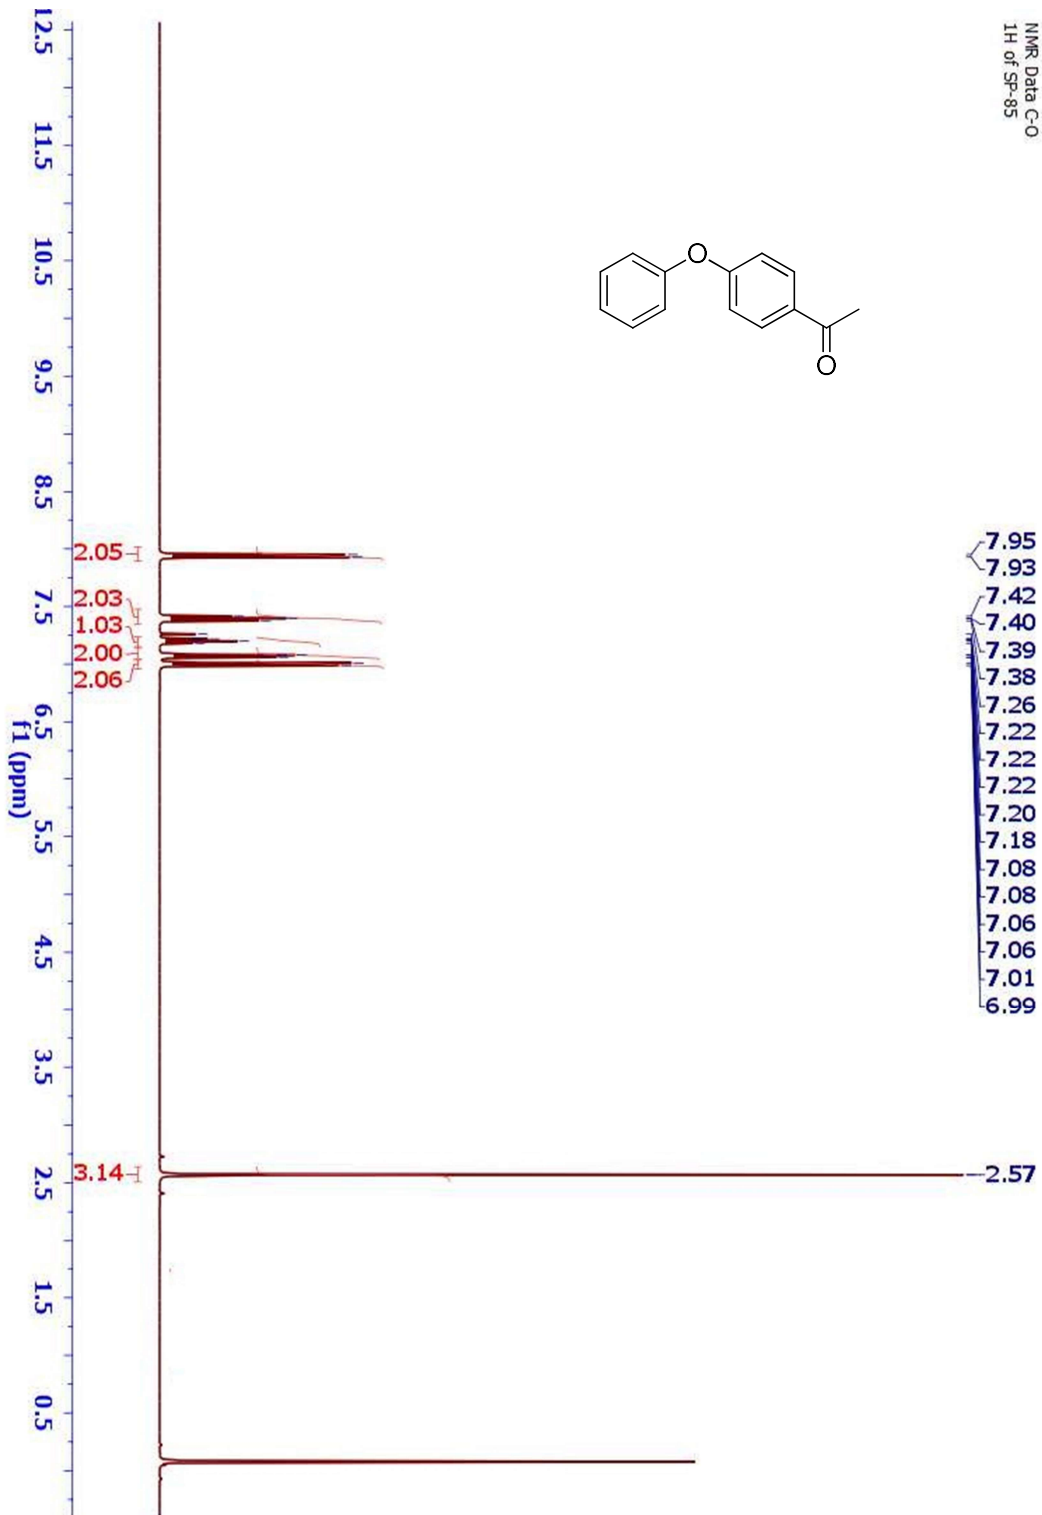

6.8.2022  
13C of SP-87

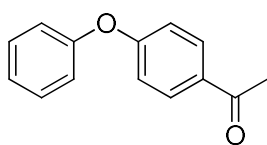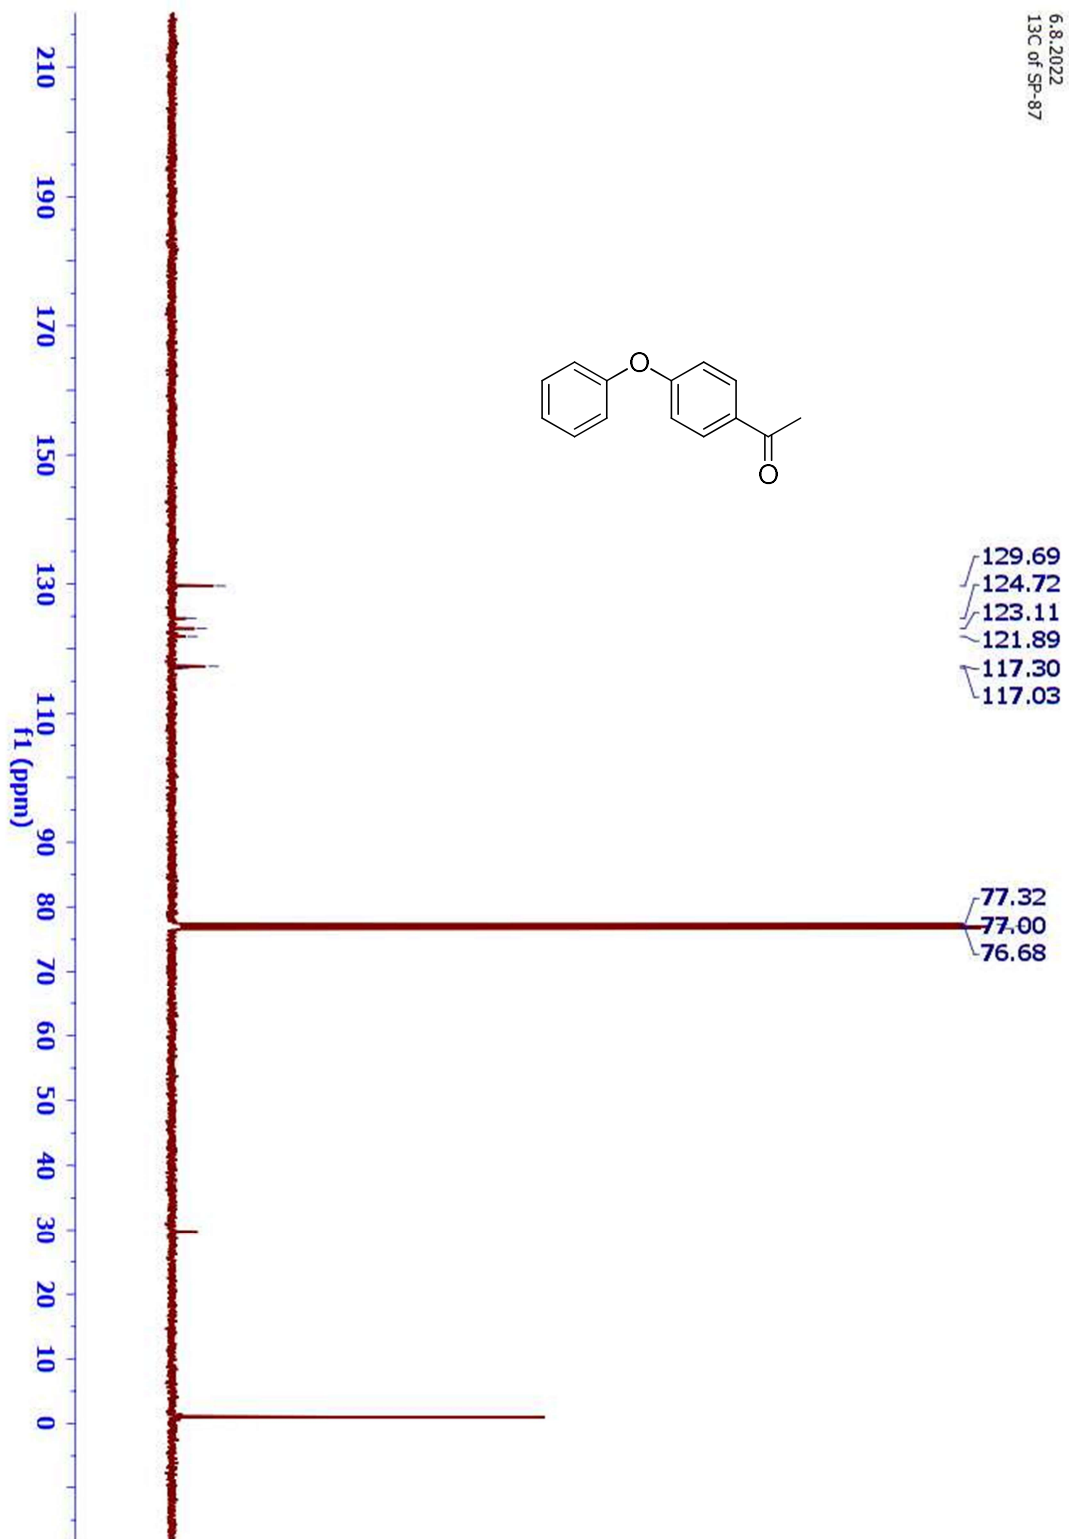

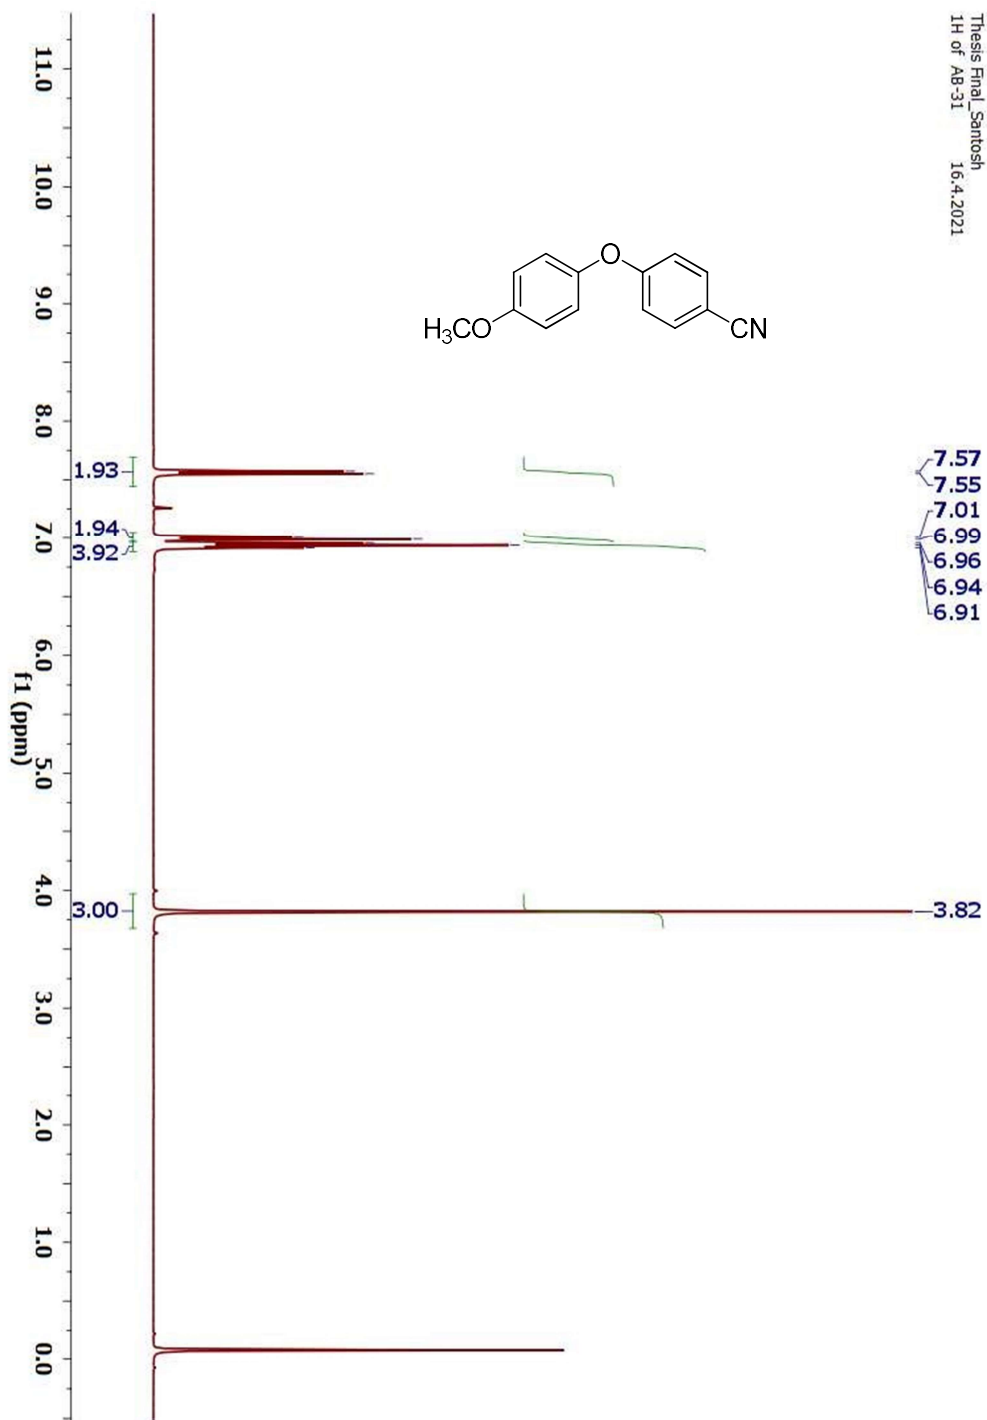

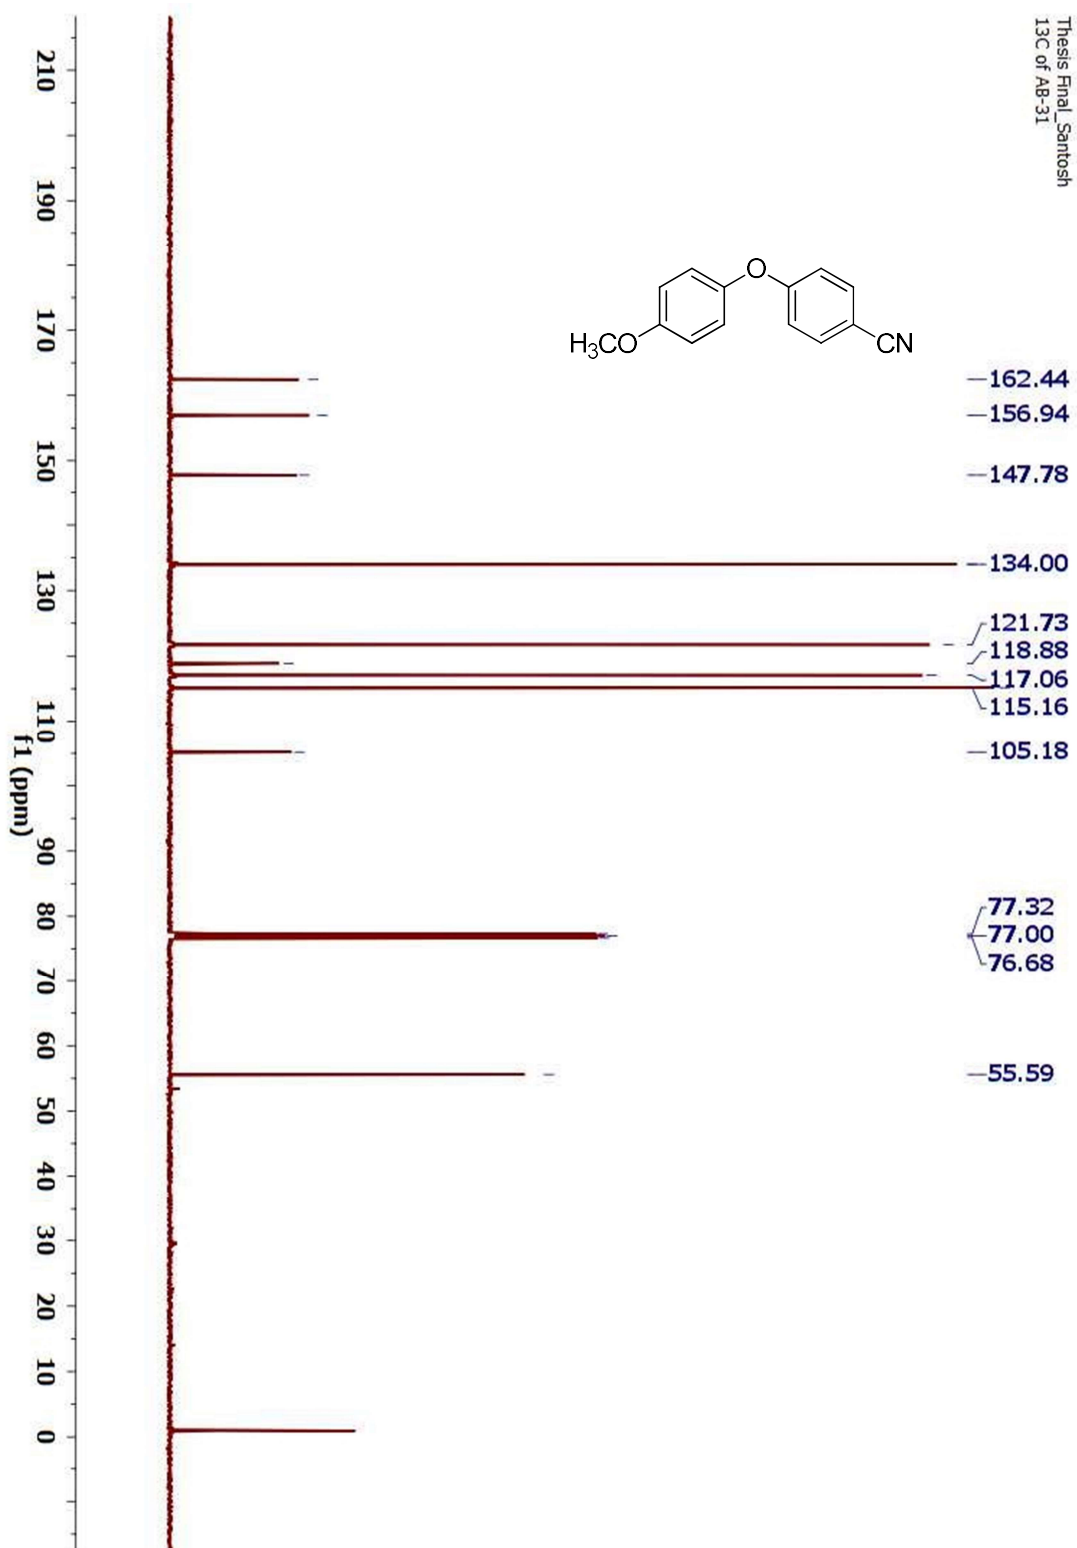

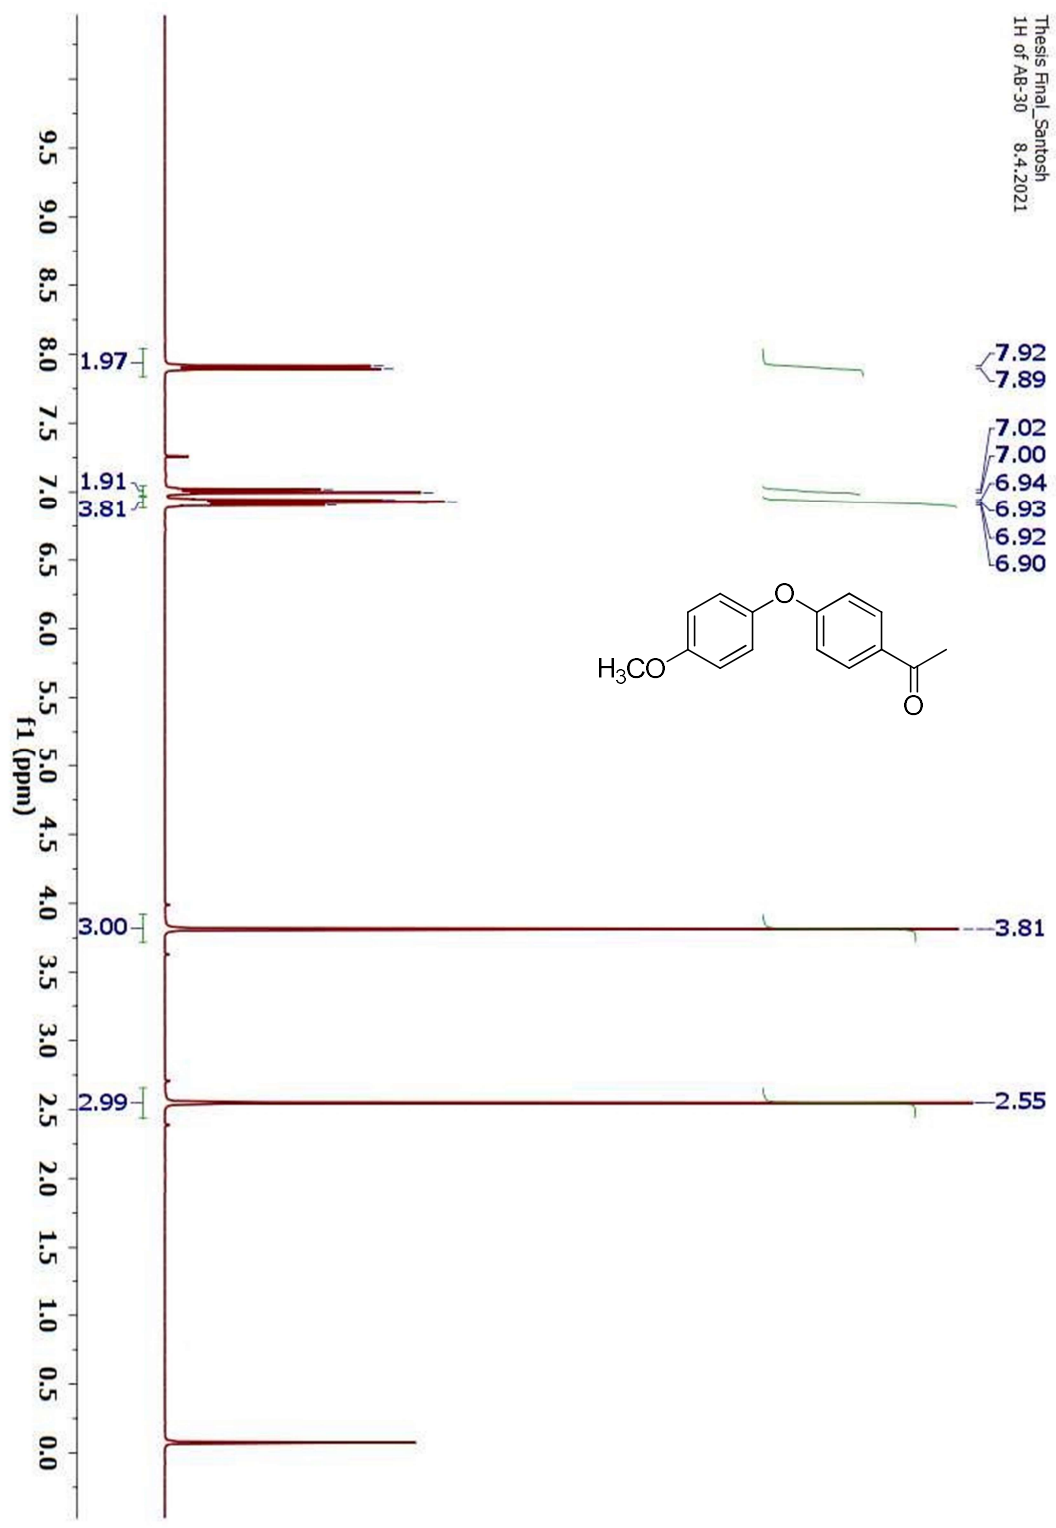

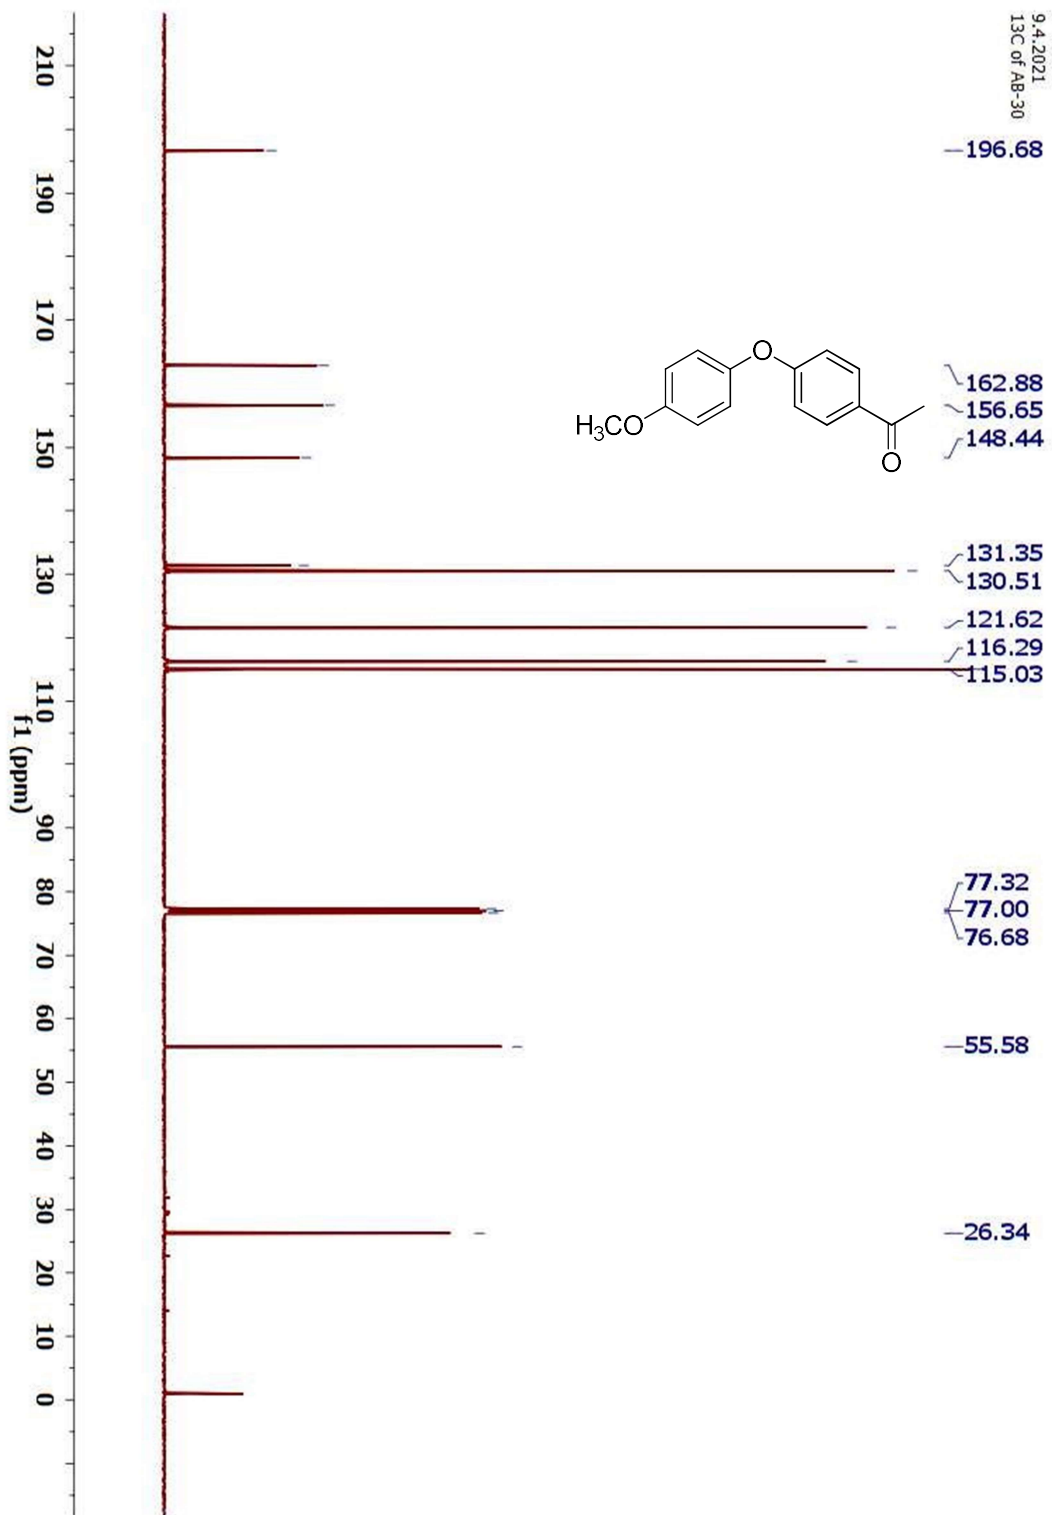

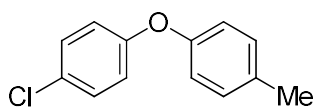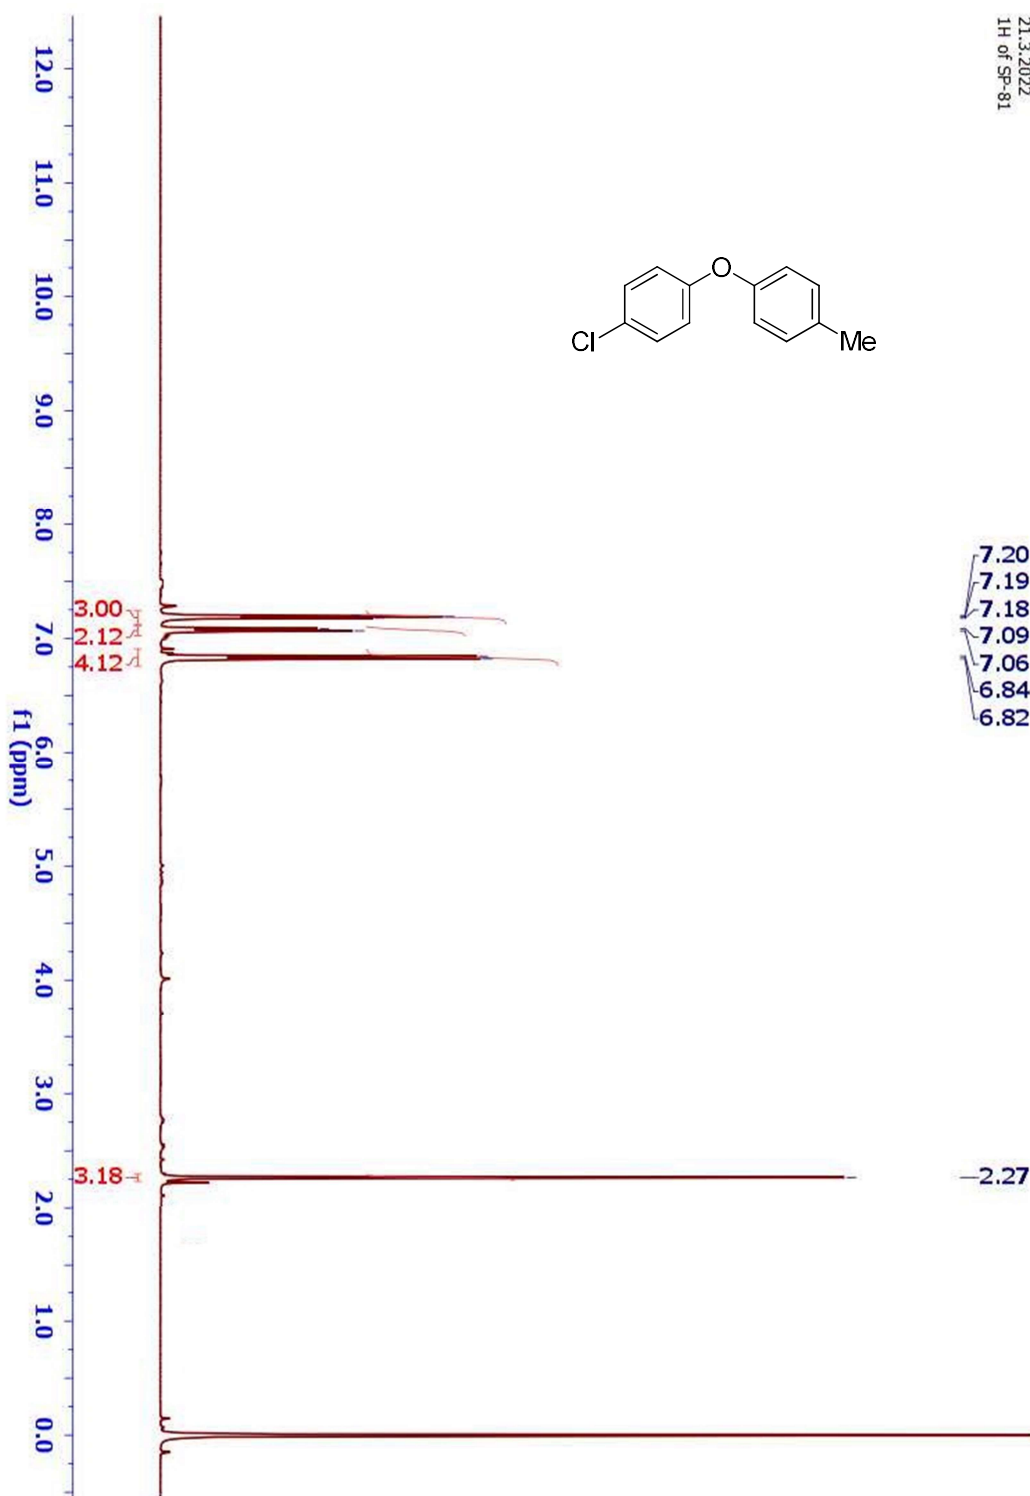

5.8.2022  
13C of SP-81

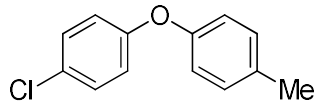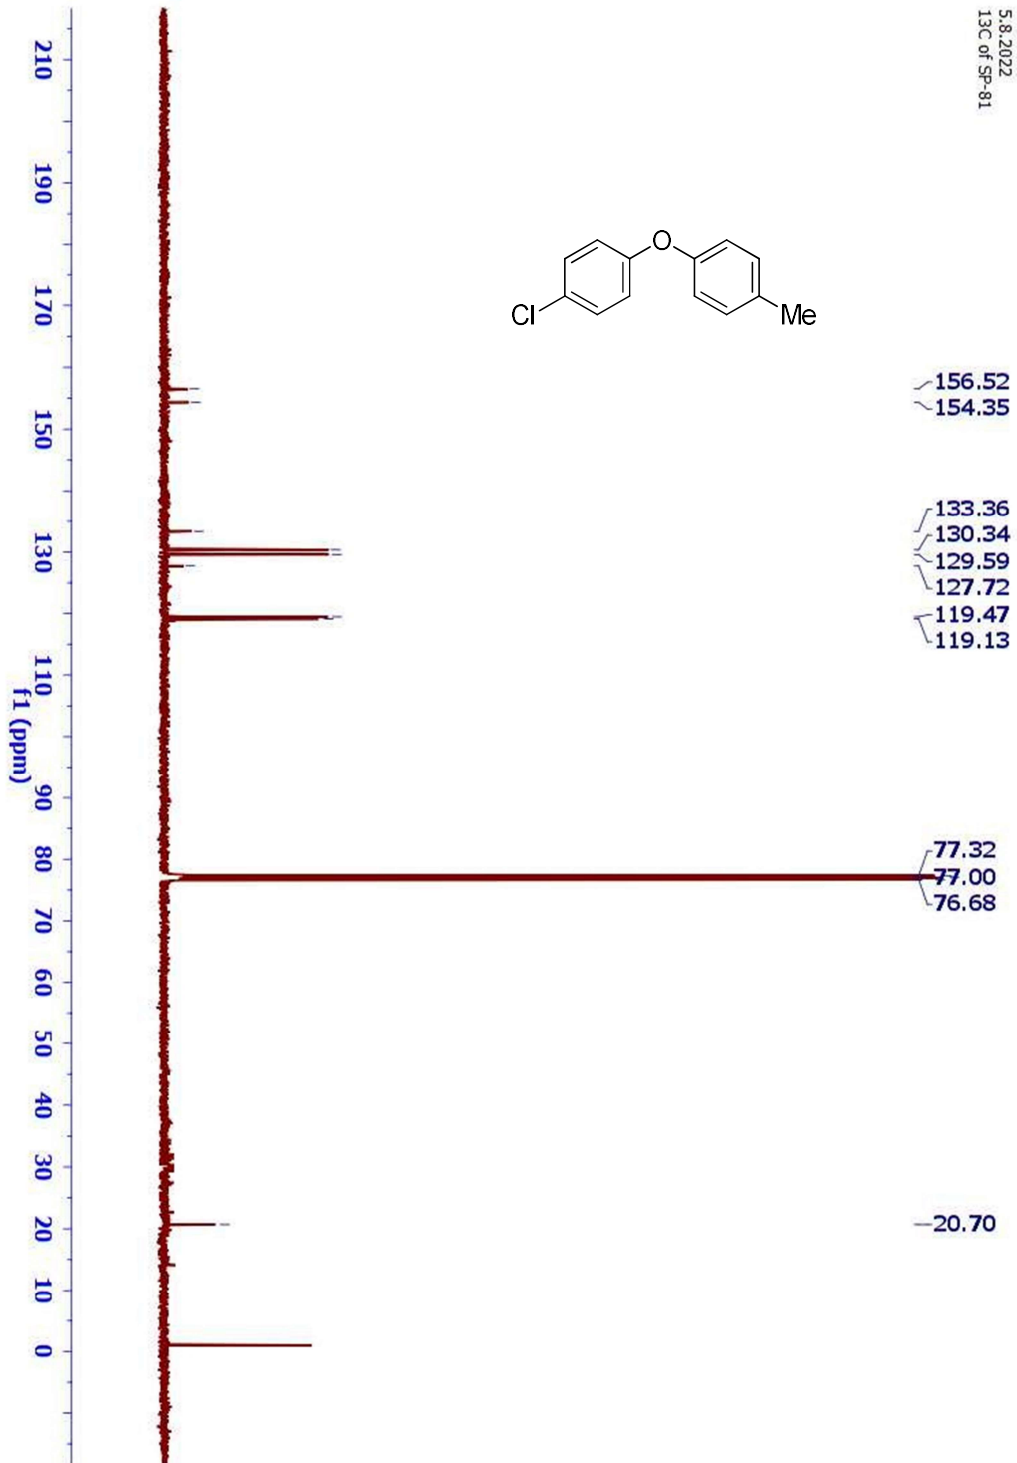



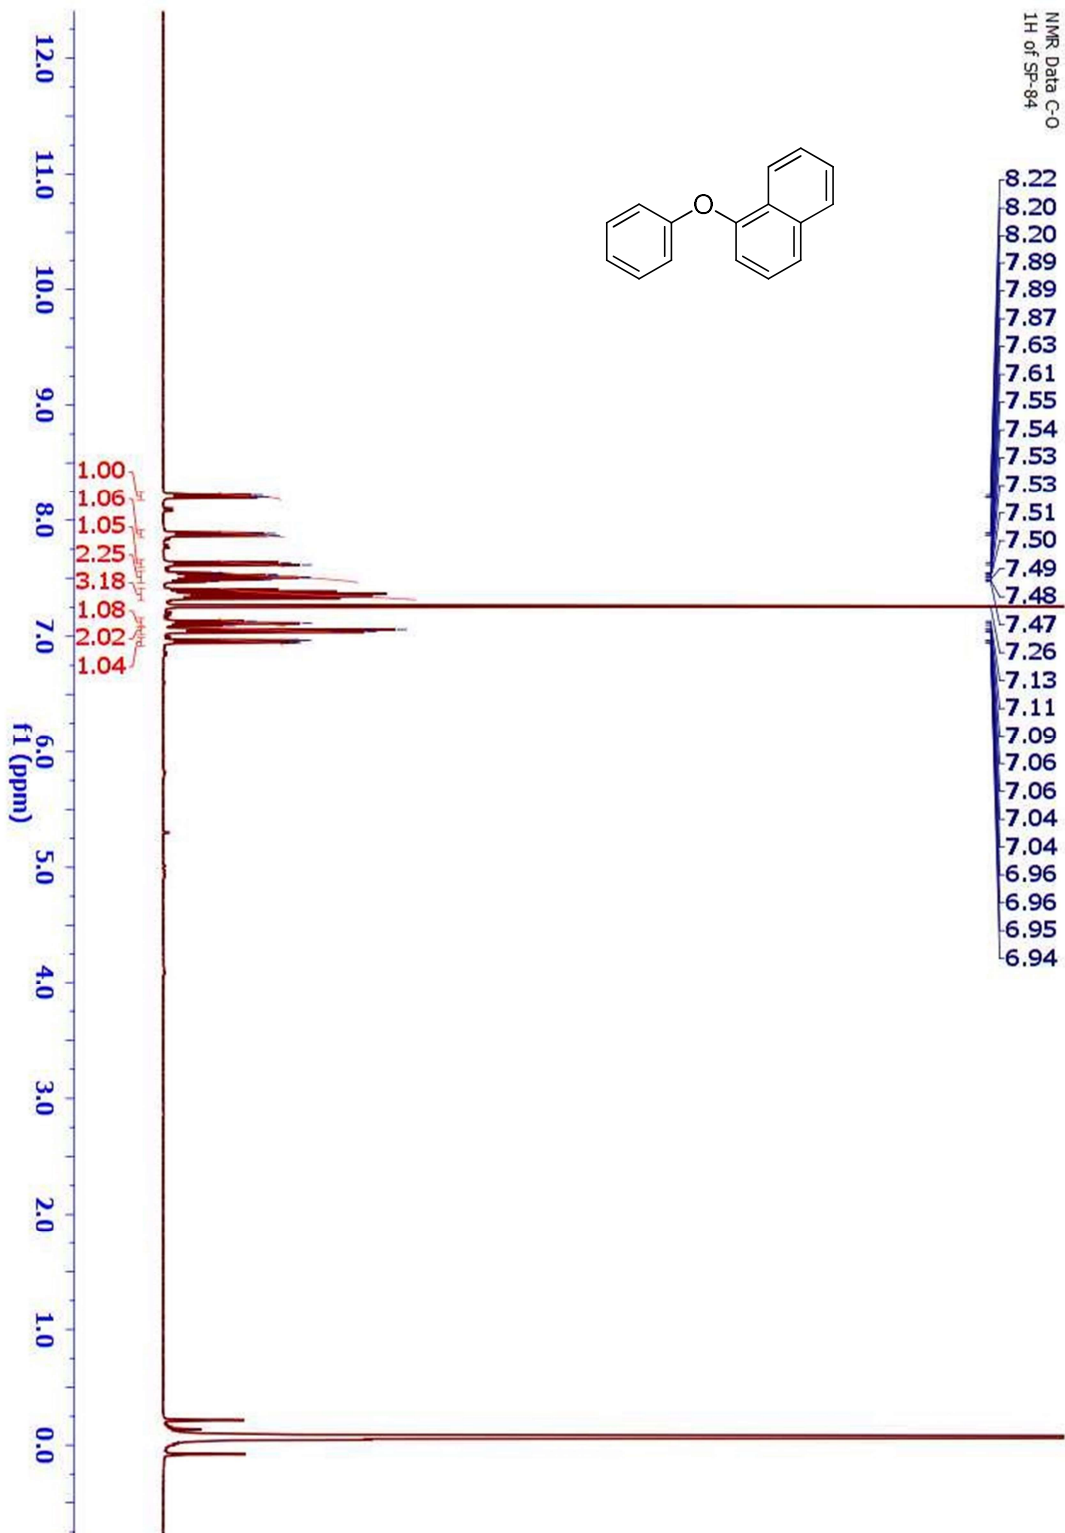

5.8.2022  
13C of Sp-84

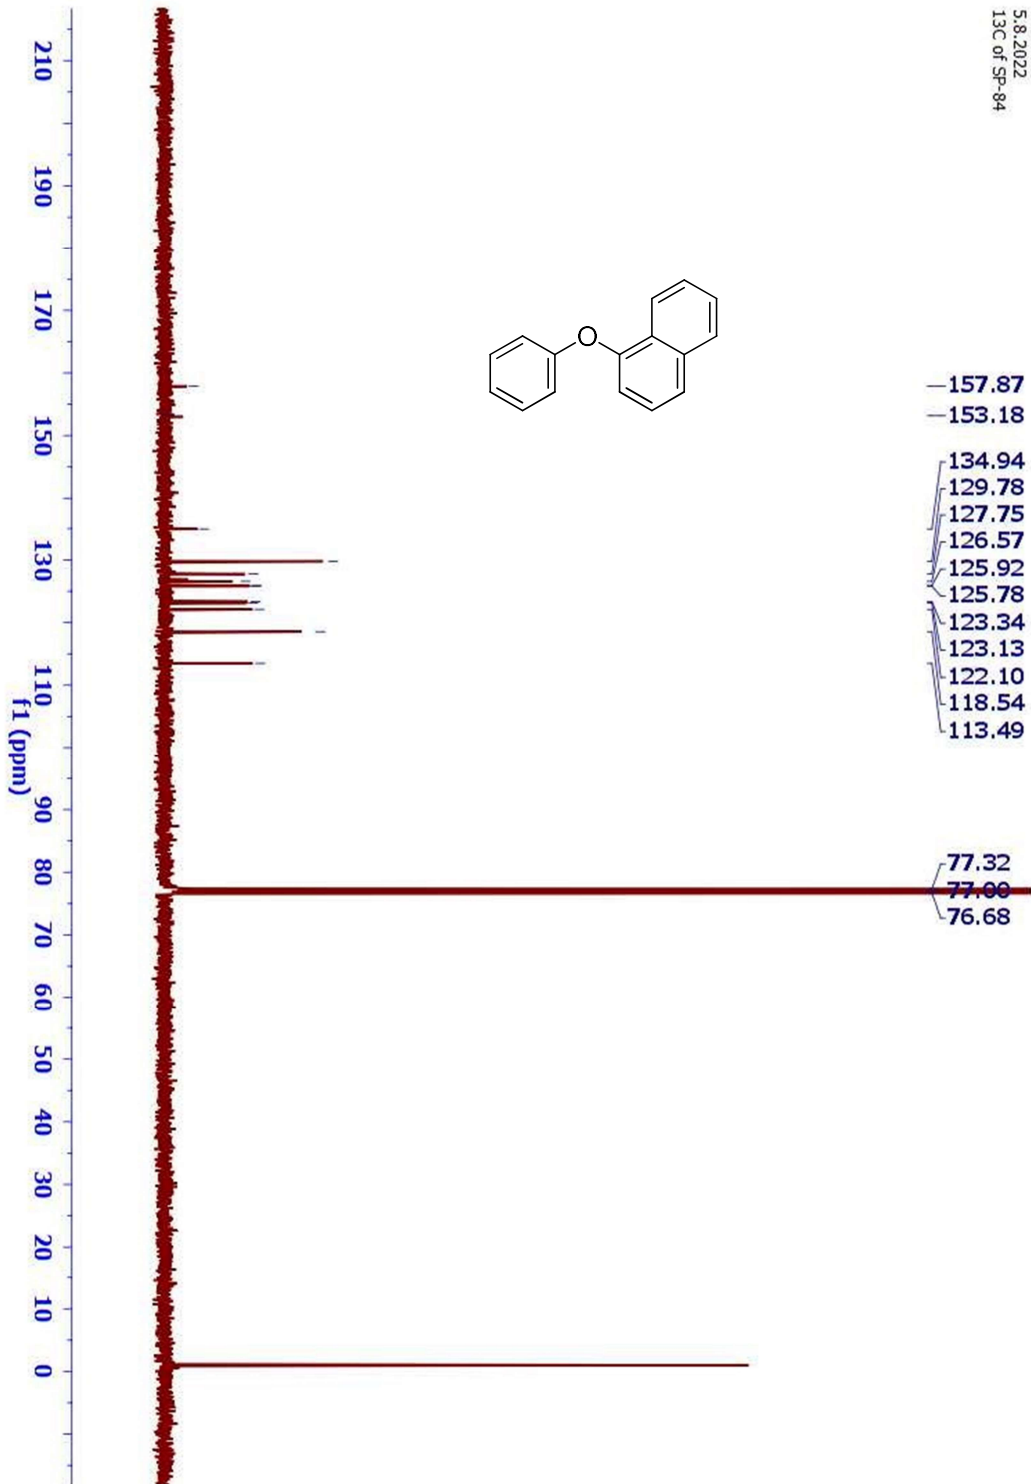

13-4-2022  
1H of SP-87

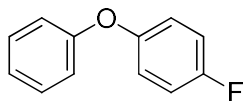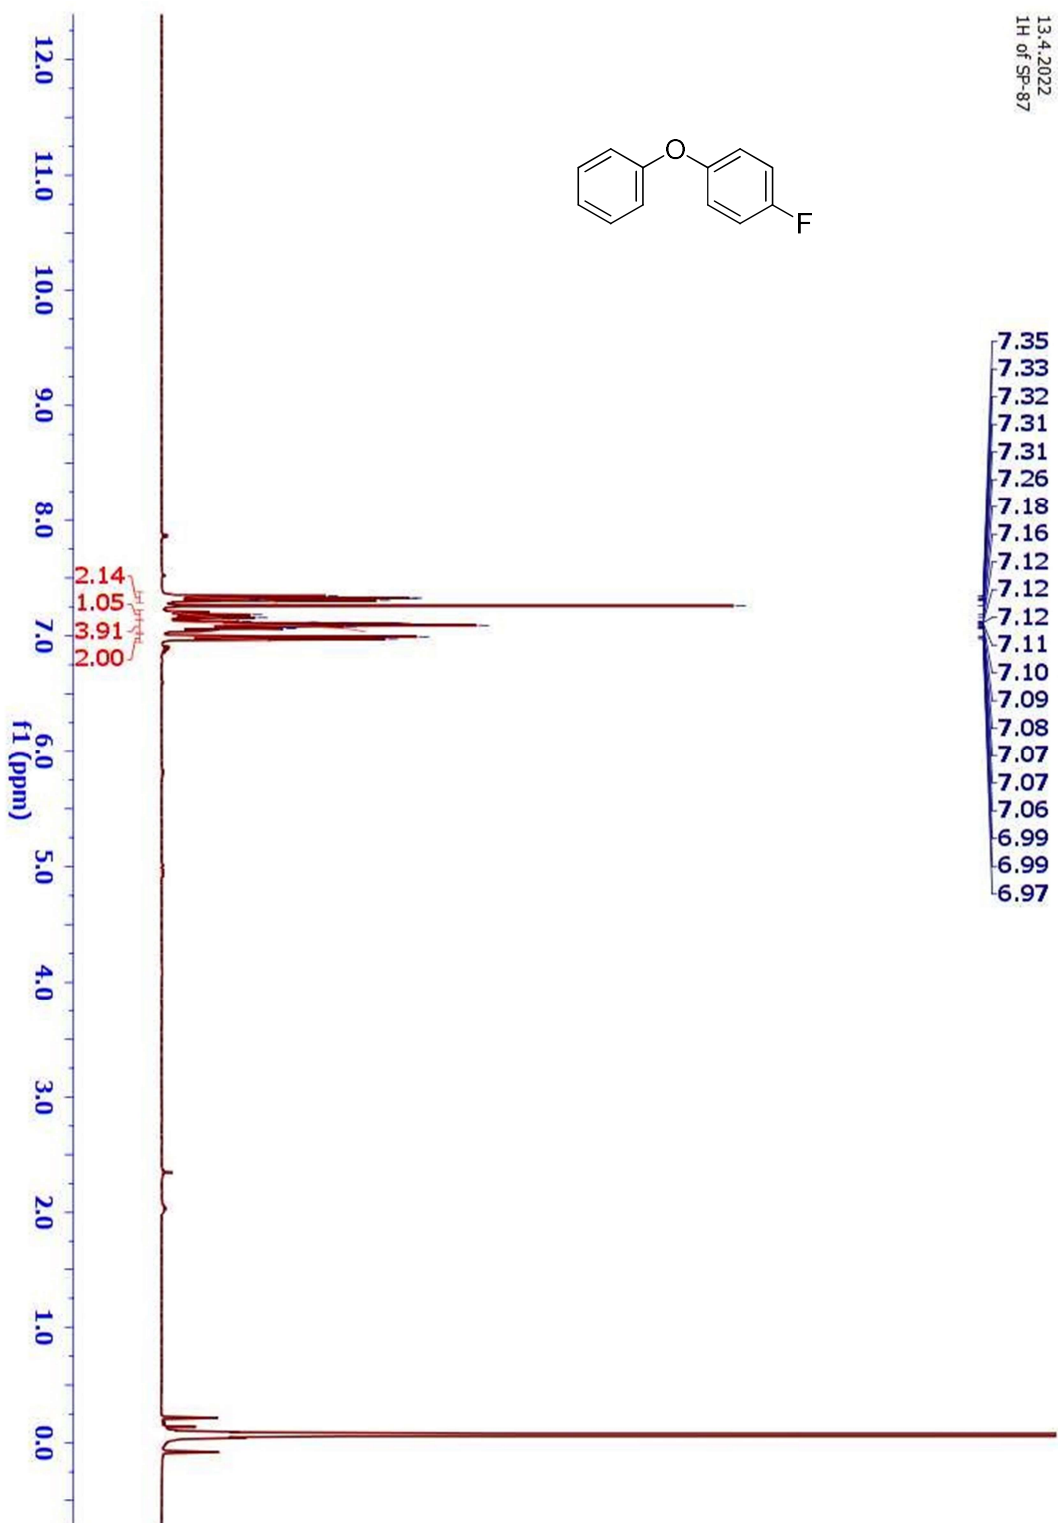

6.8.2022  
13C of SP-87

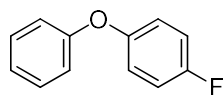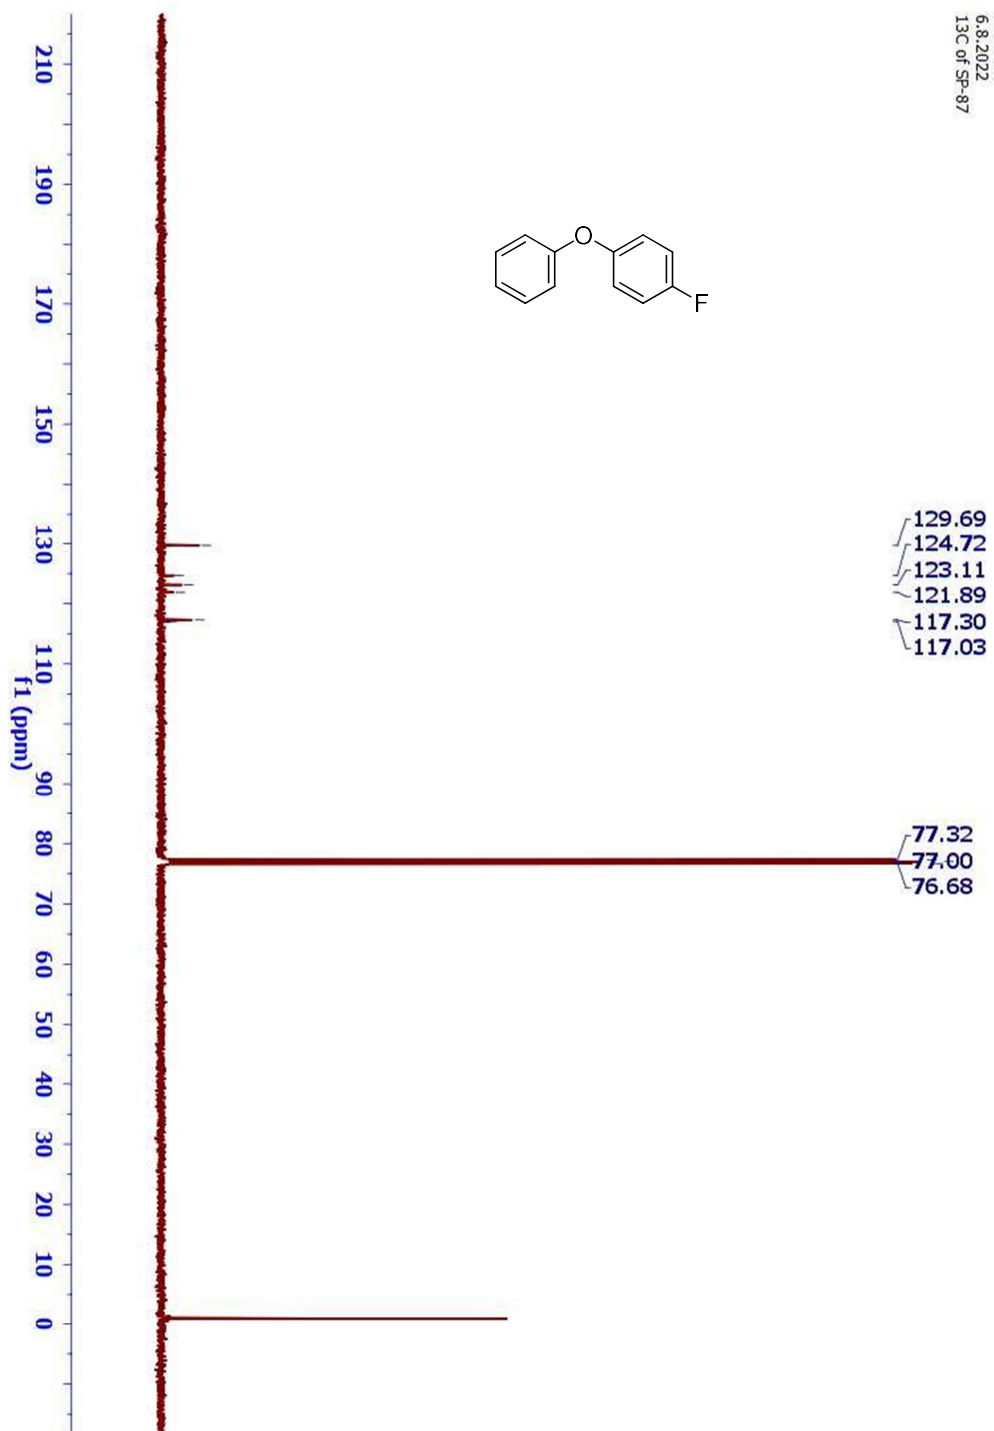

13.4.2022  
1H of SP-91

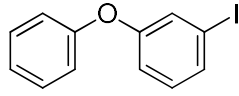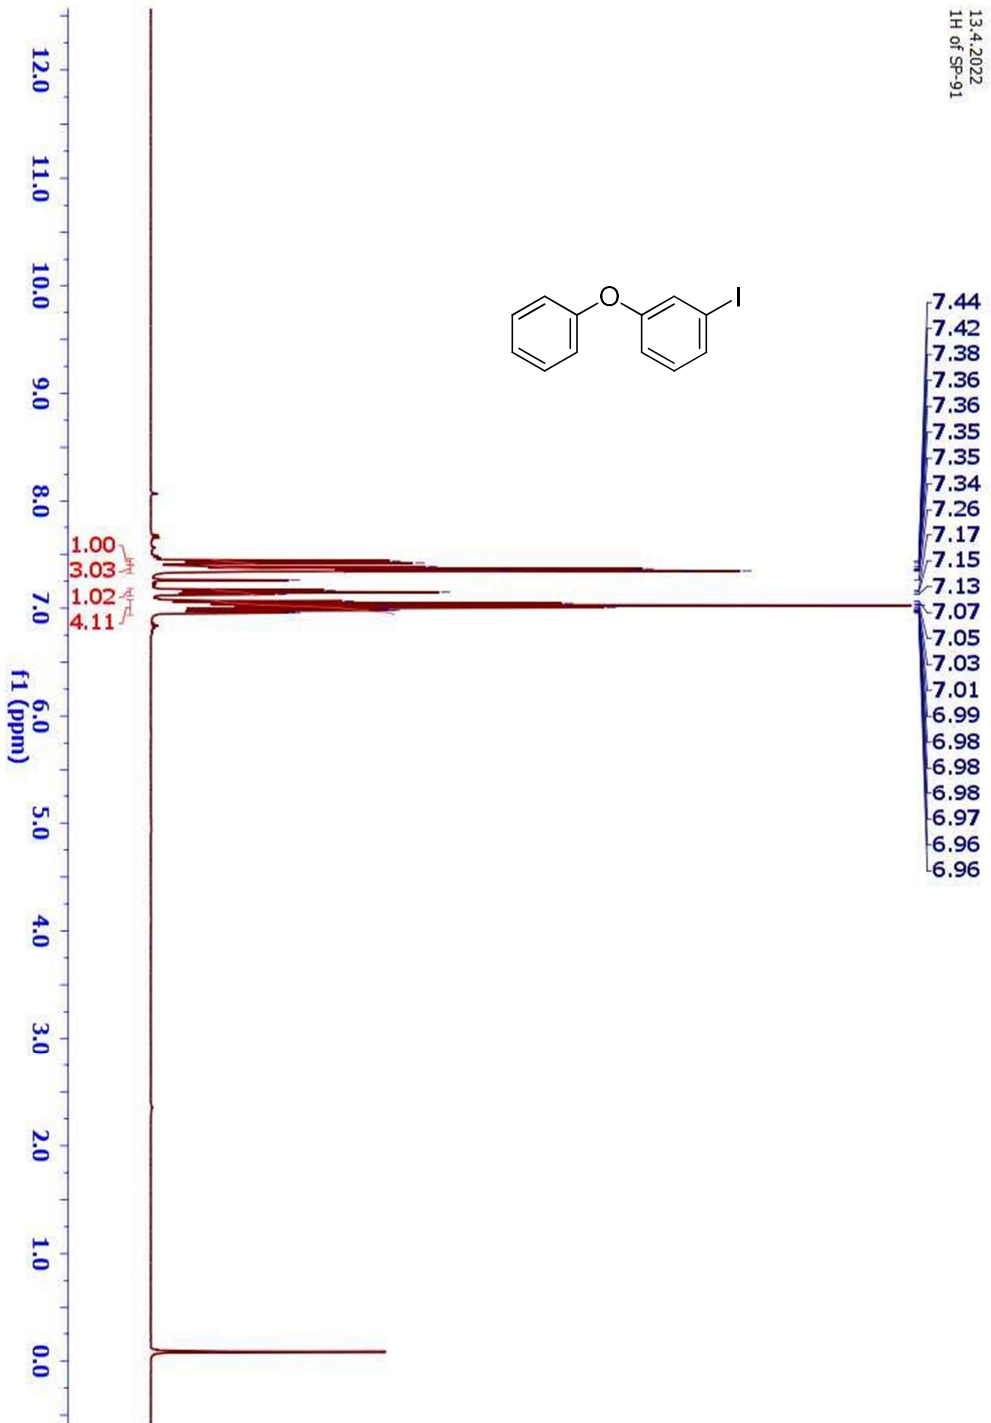

22.8.2022  
13C of SP-91

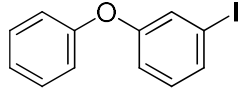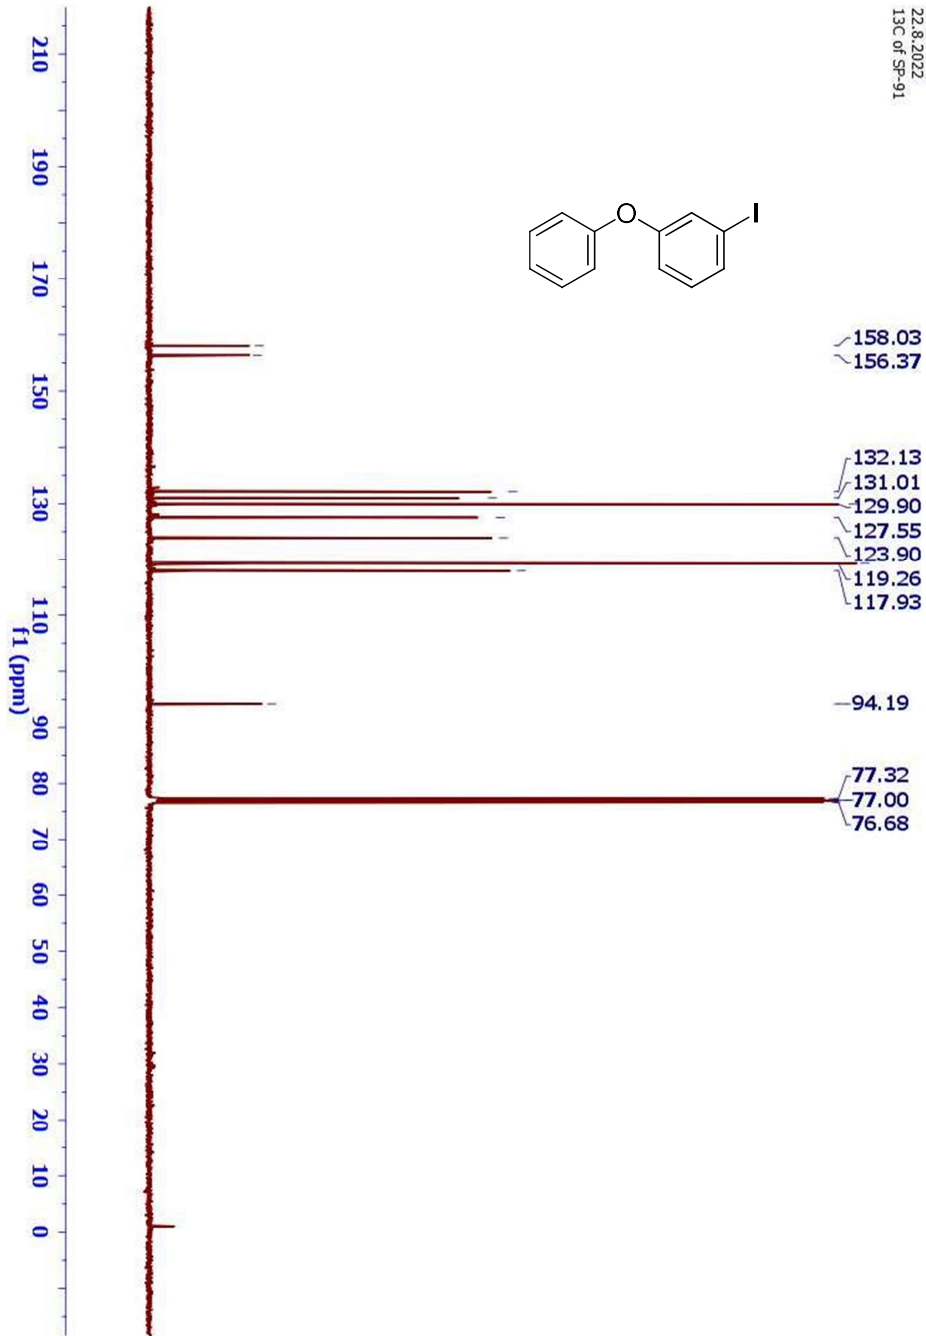

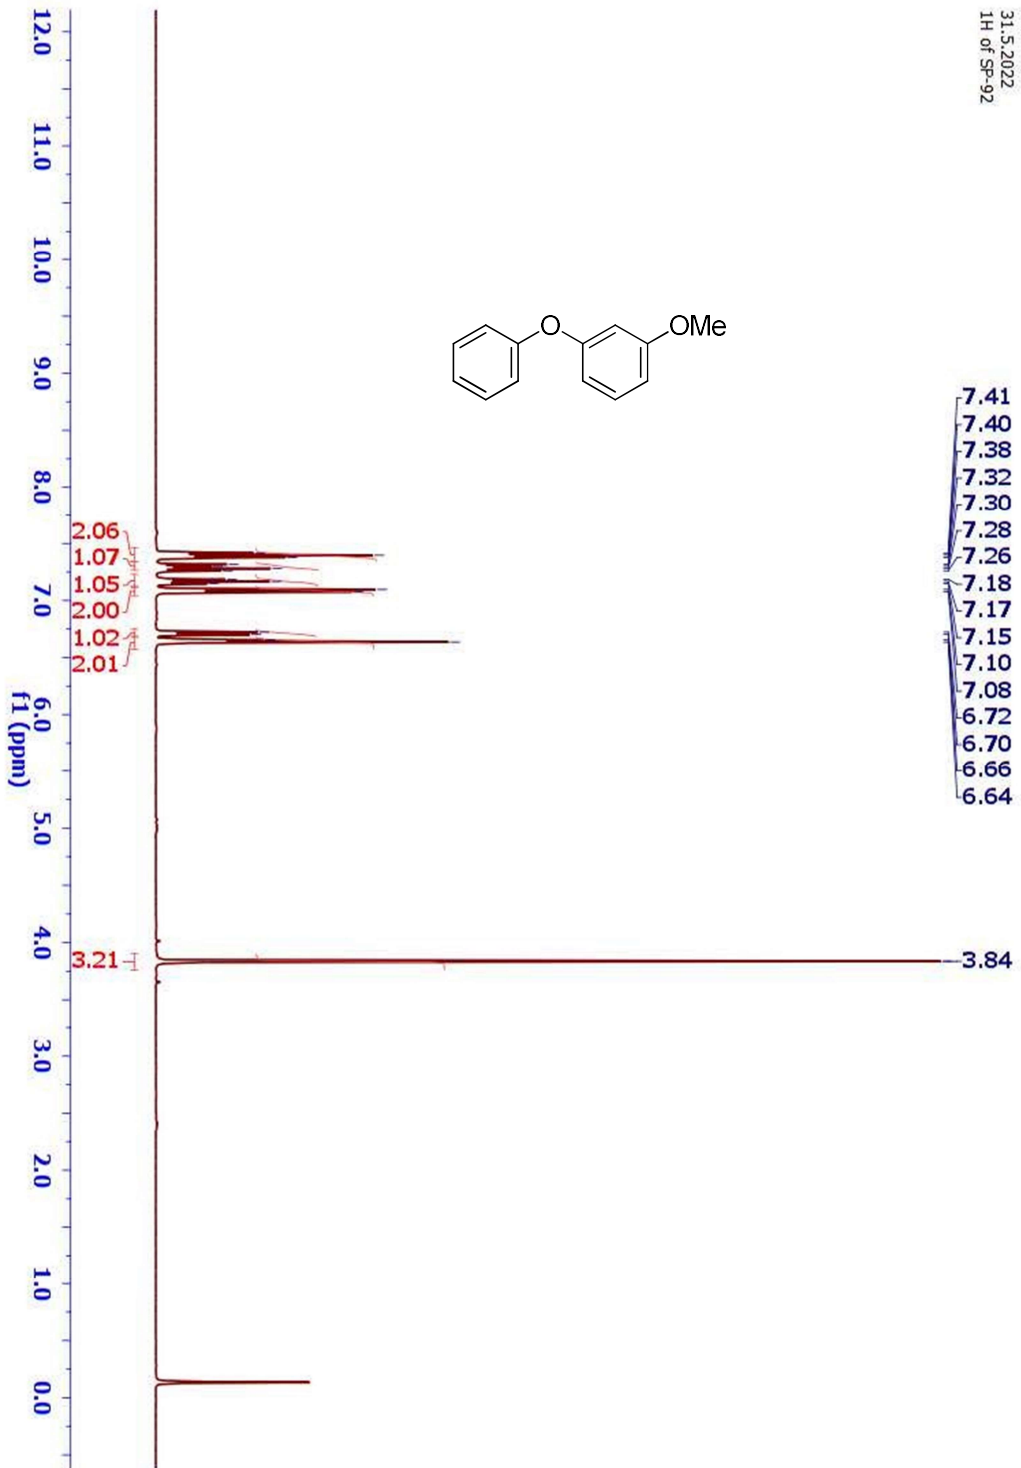

6.8.2022  
13C of SP-92

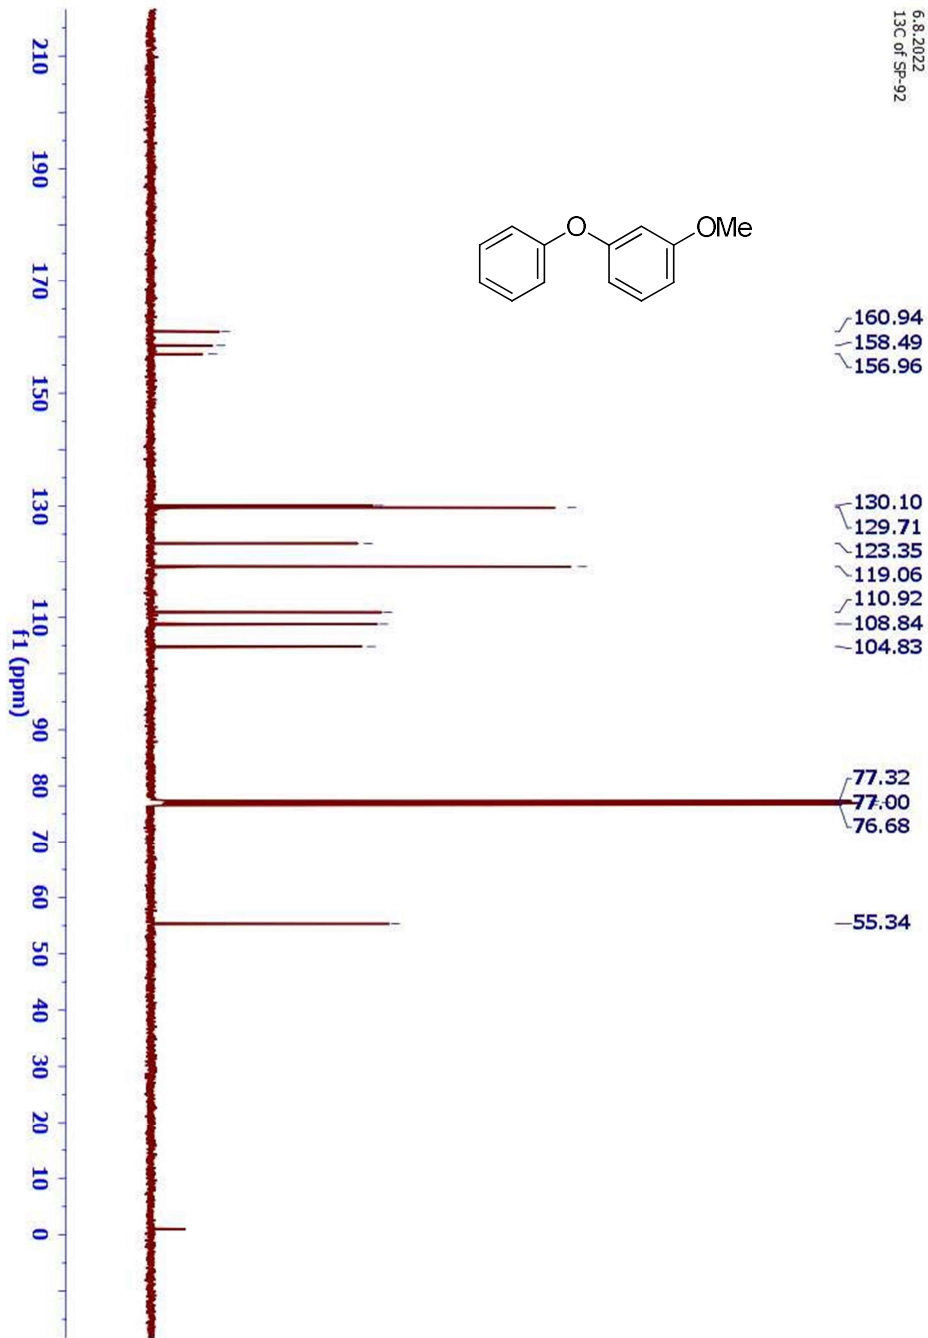



NMR Data C-0  
1H of SP-93

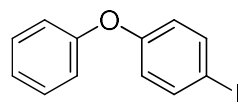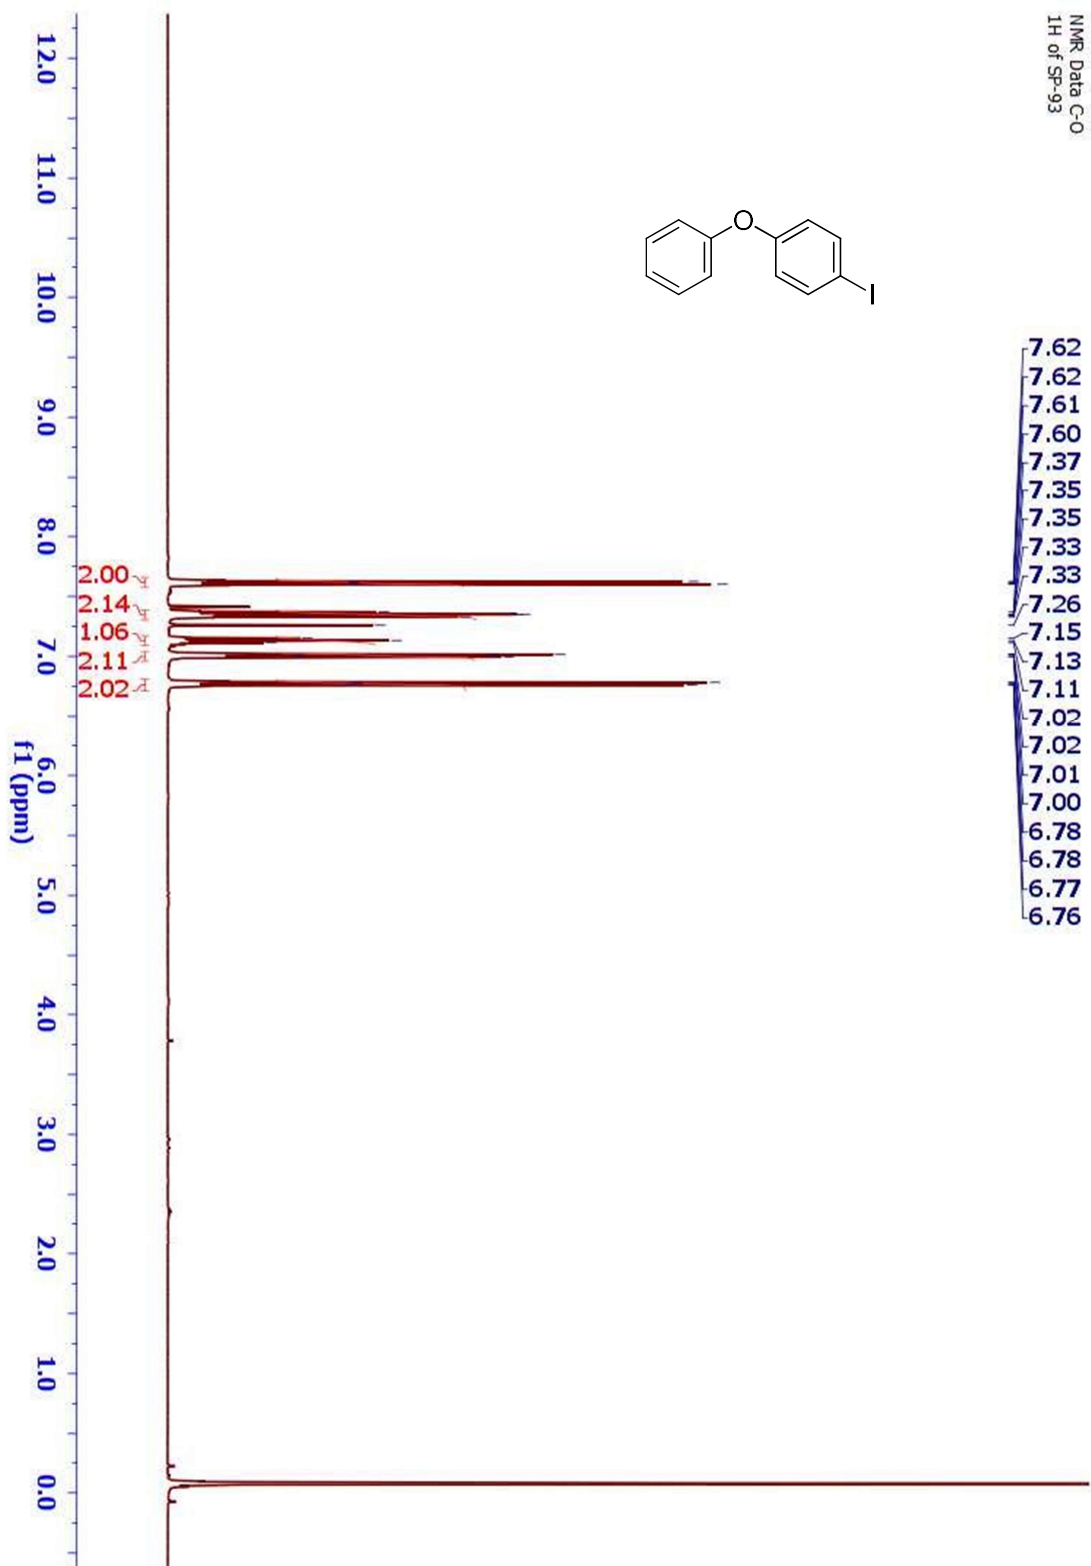

22:8:2022  
13C of SP-93

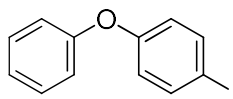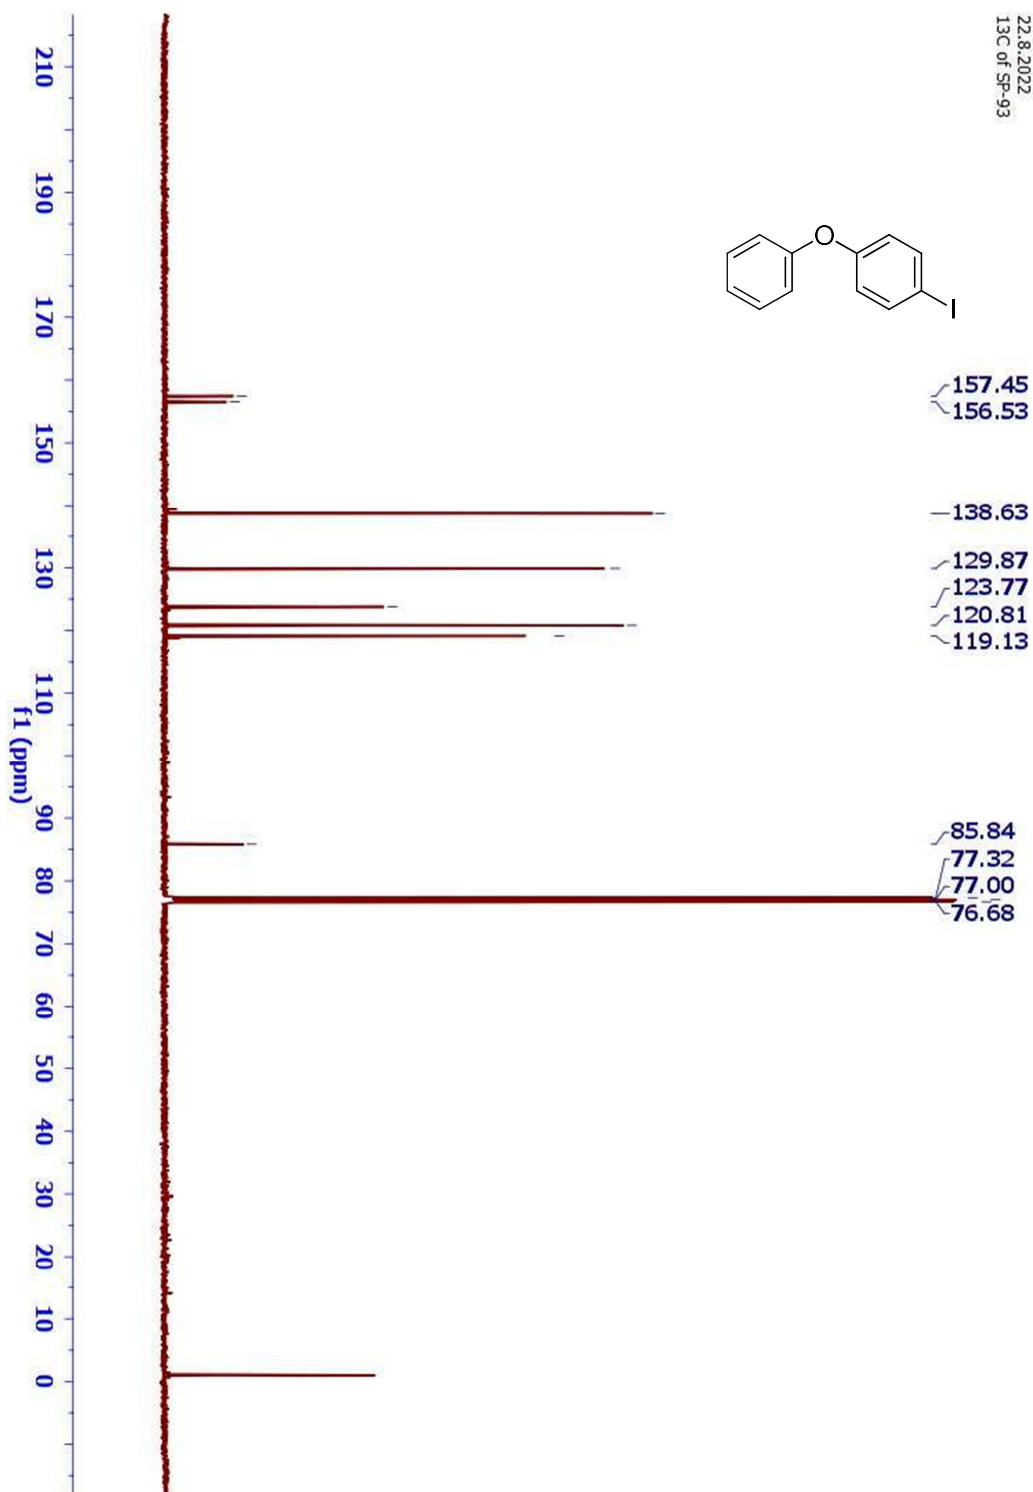

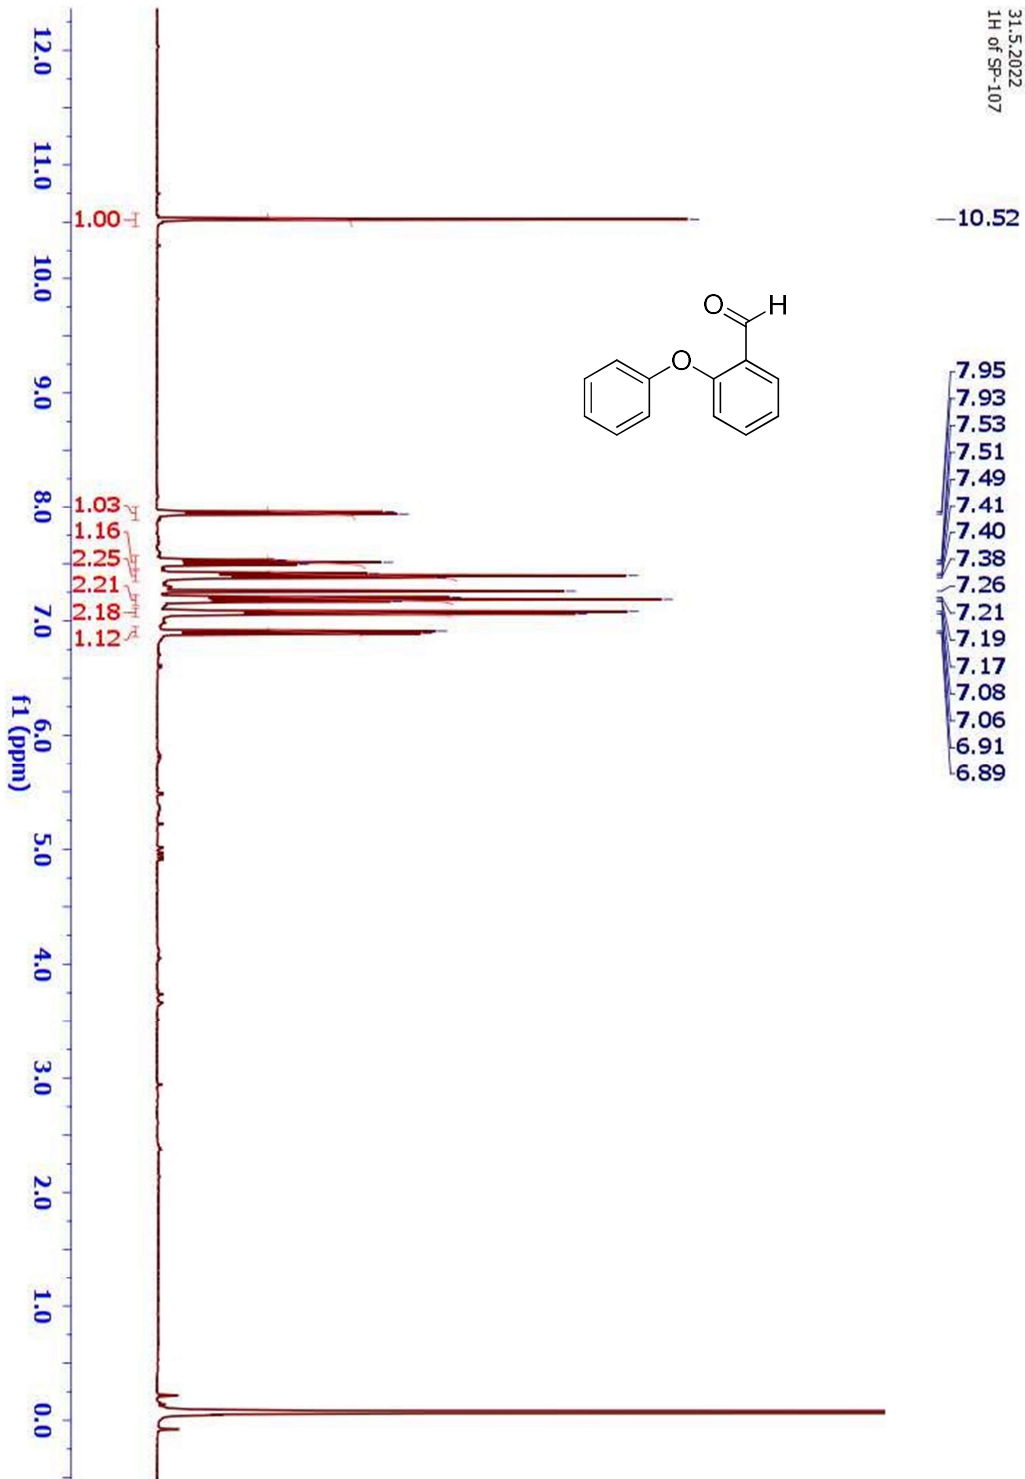

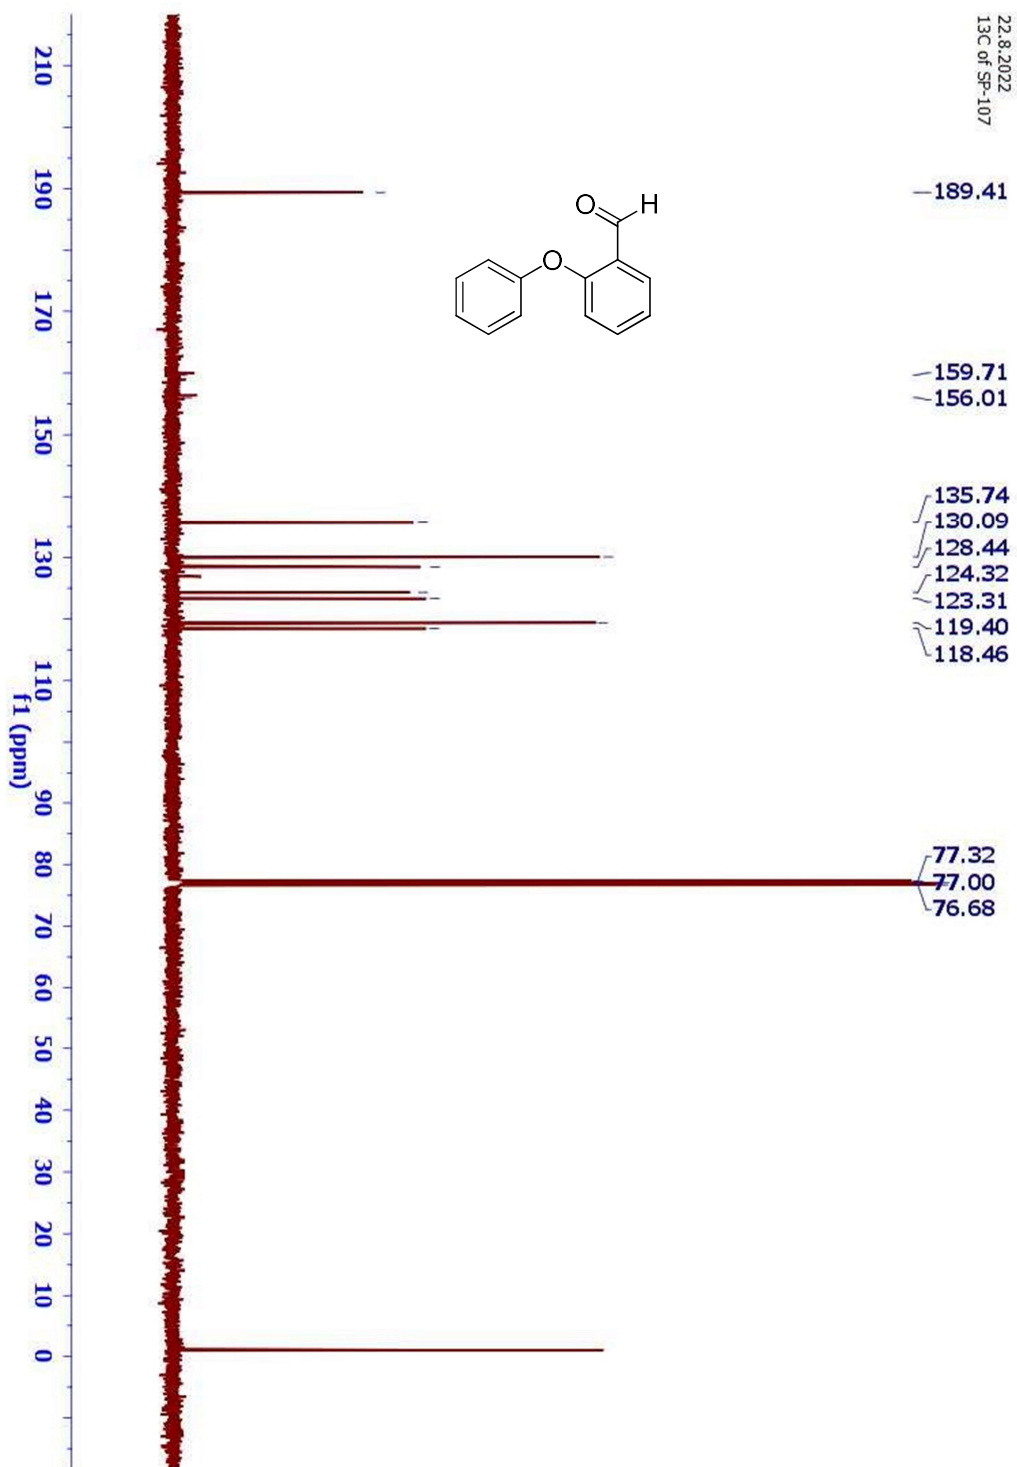

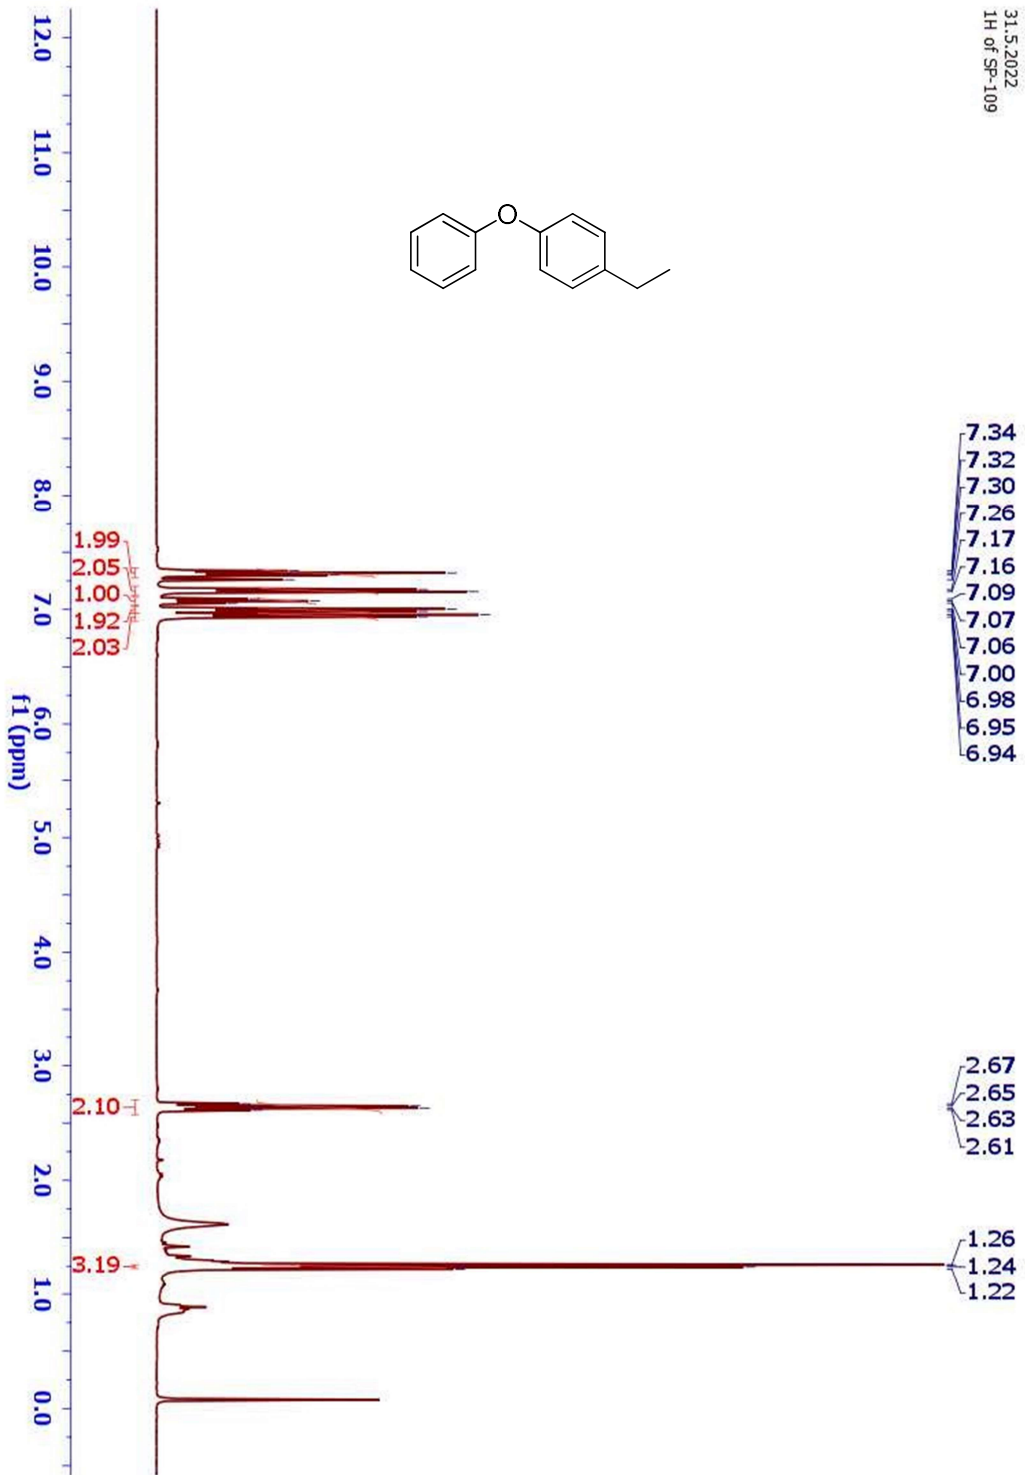

5.8.2022  
13C of Sp-109

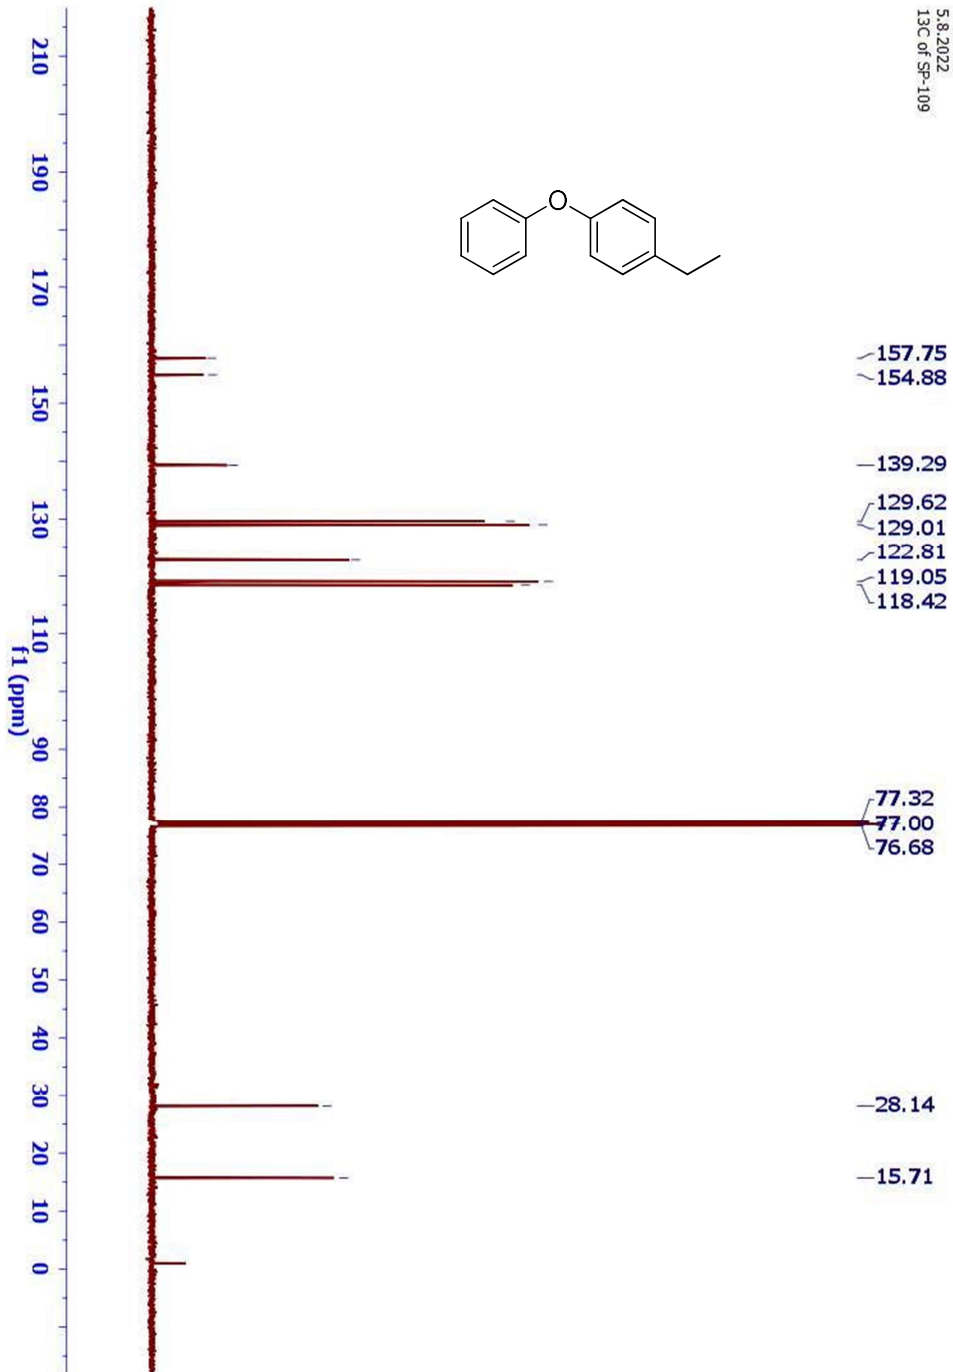

24.6.2022  
1H of SP-125

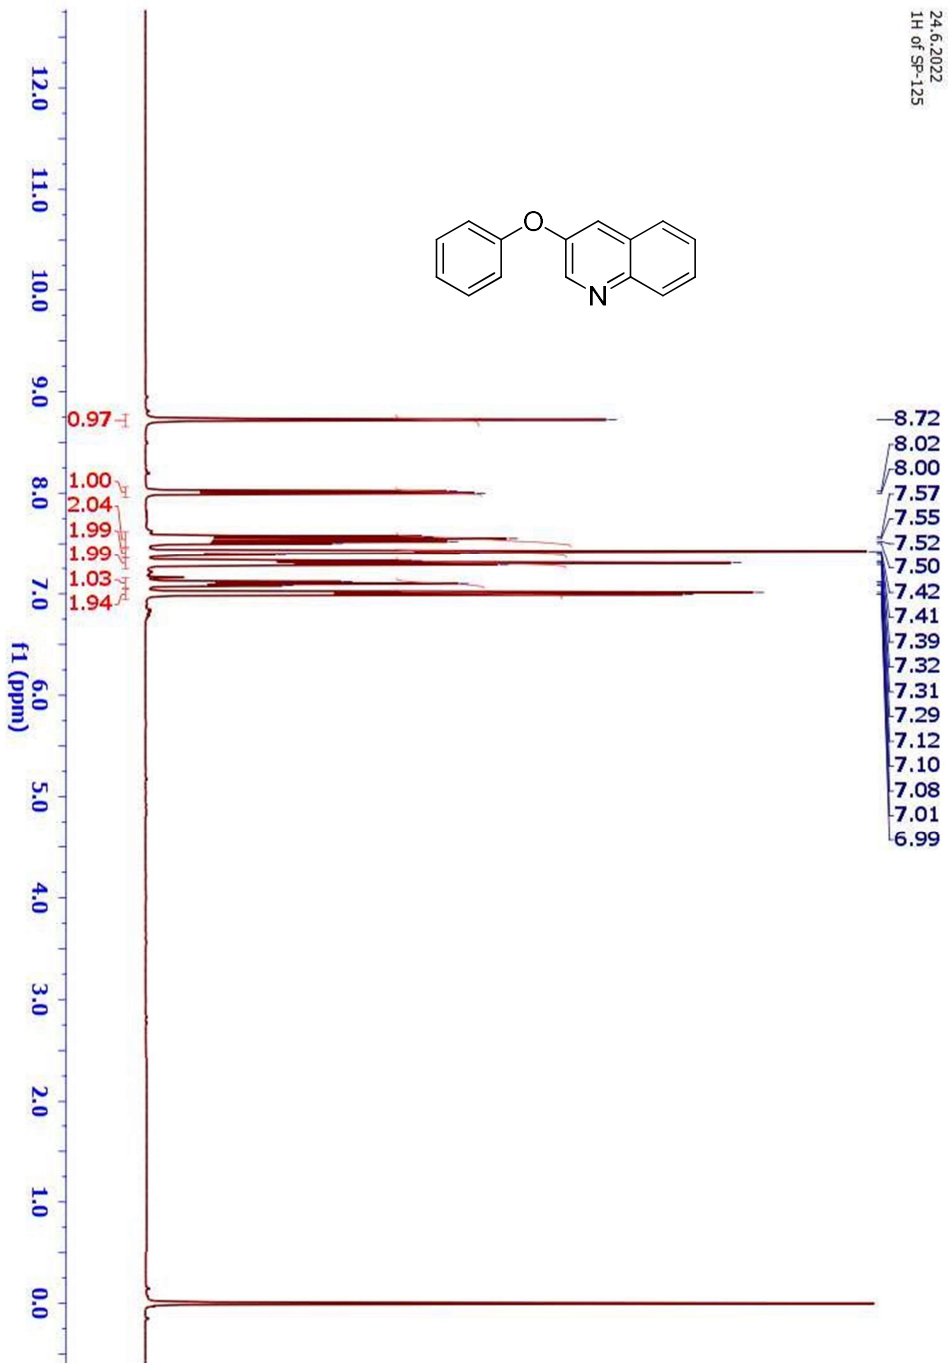

22.8.2022  
13C of SP-125

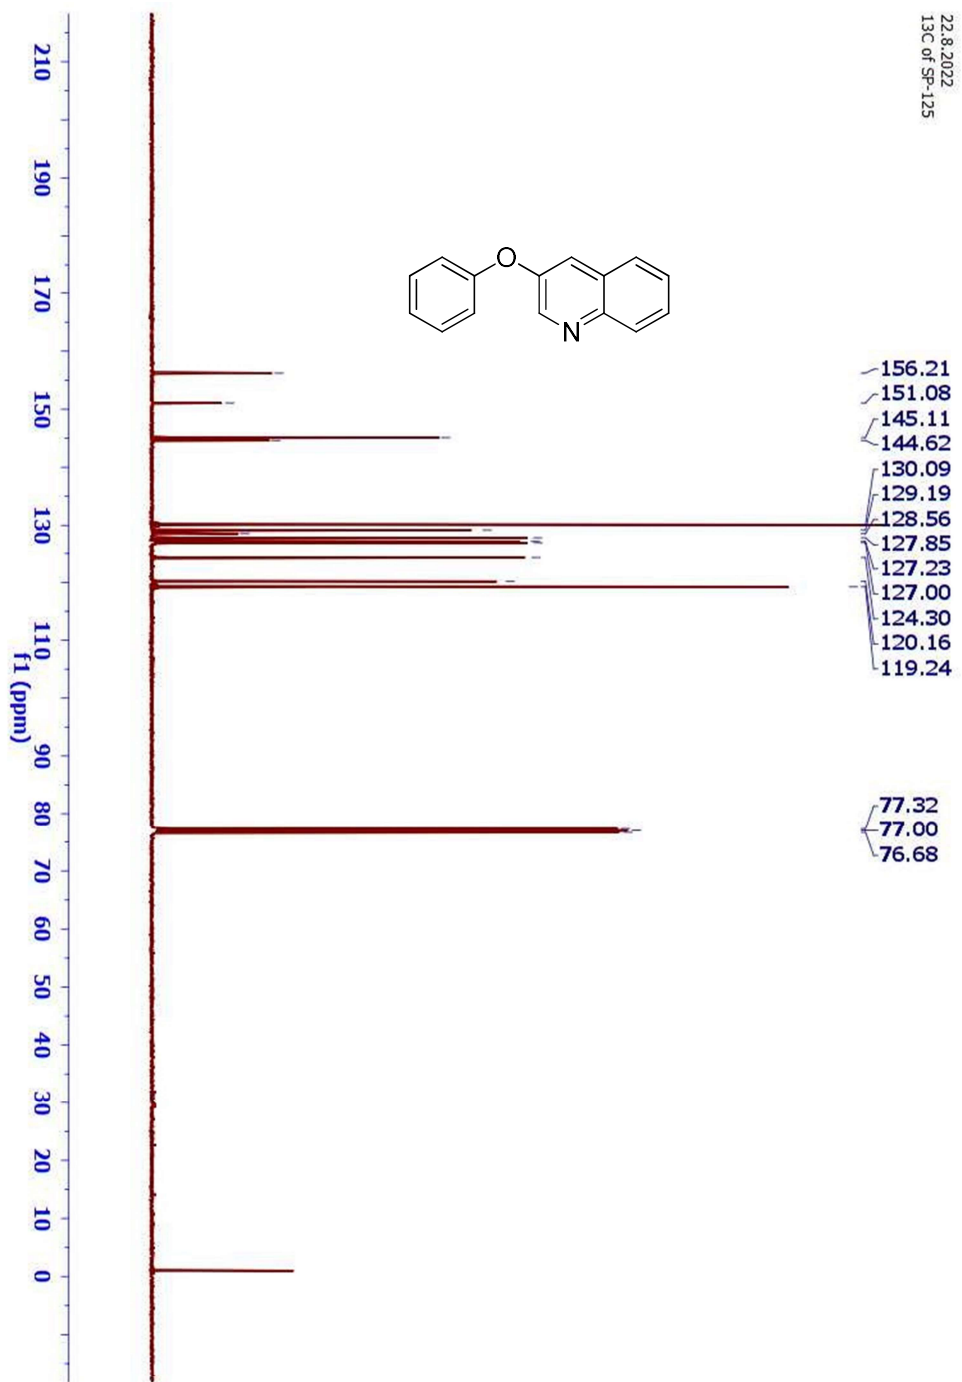



24.6.2022  
1H of SP-126

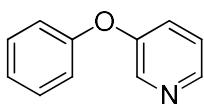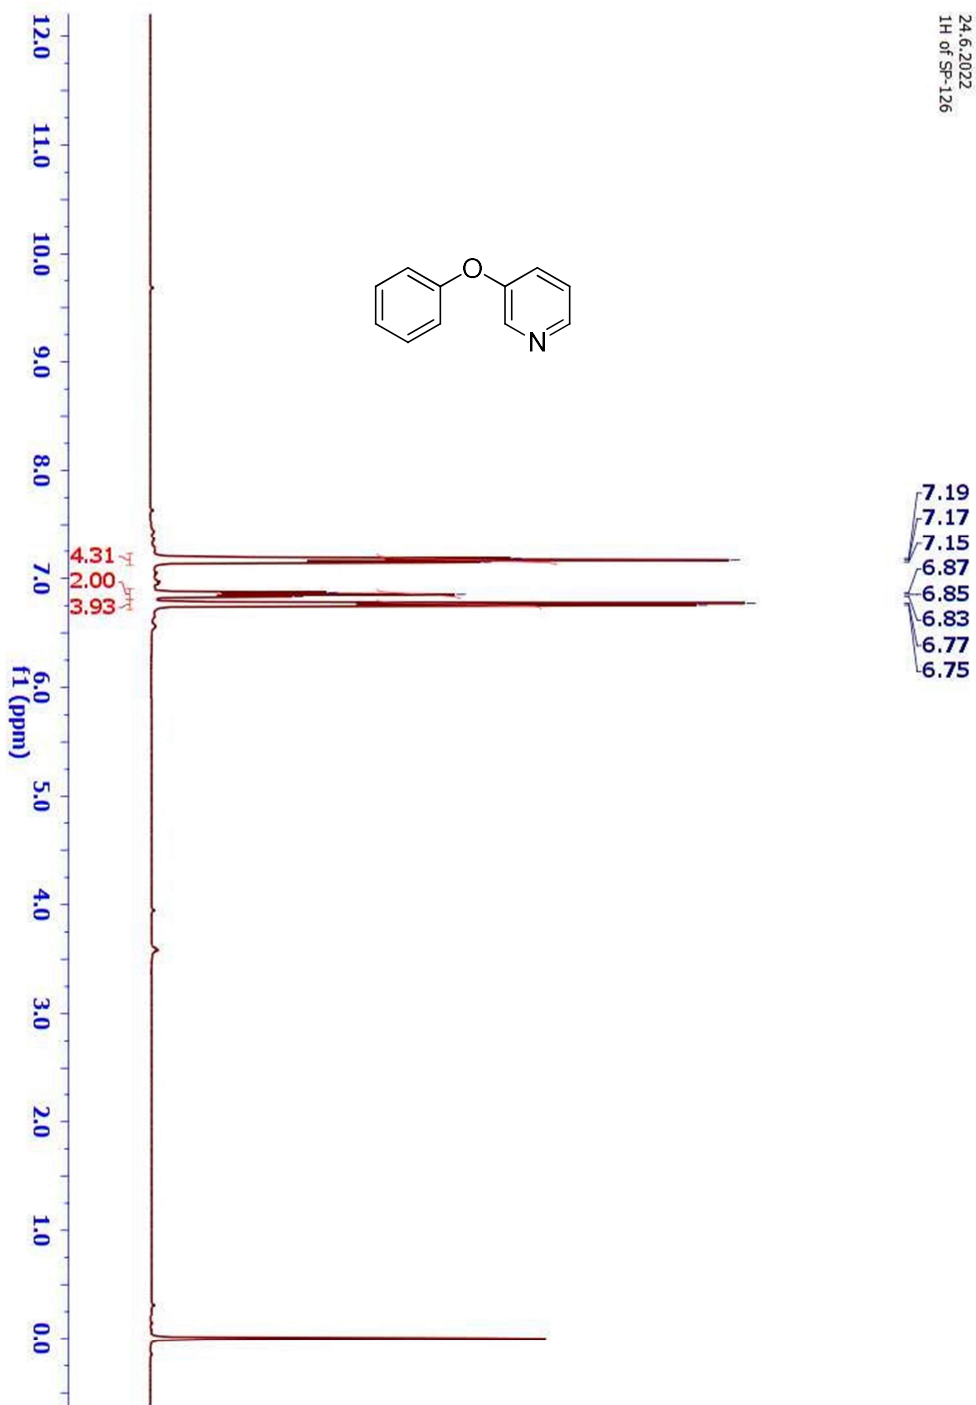

22.8.2022  
13C of SP-126

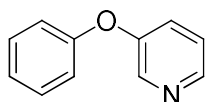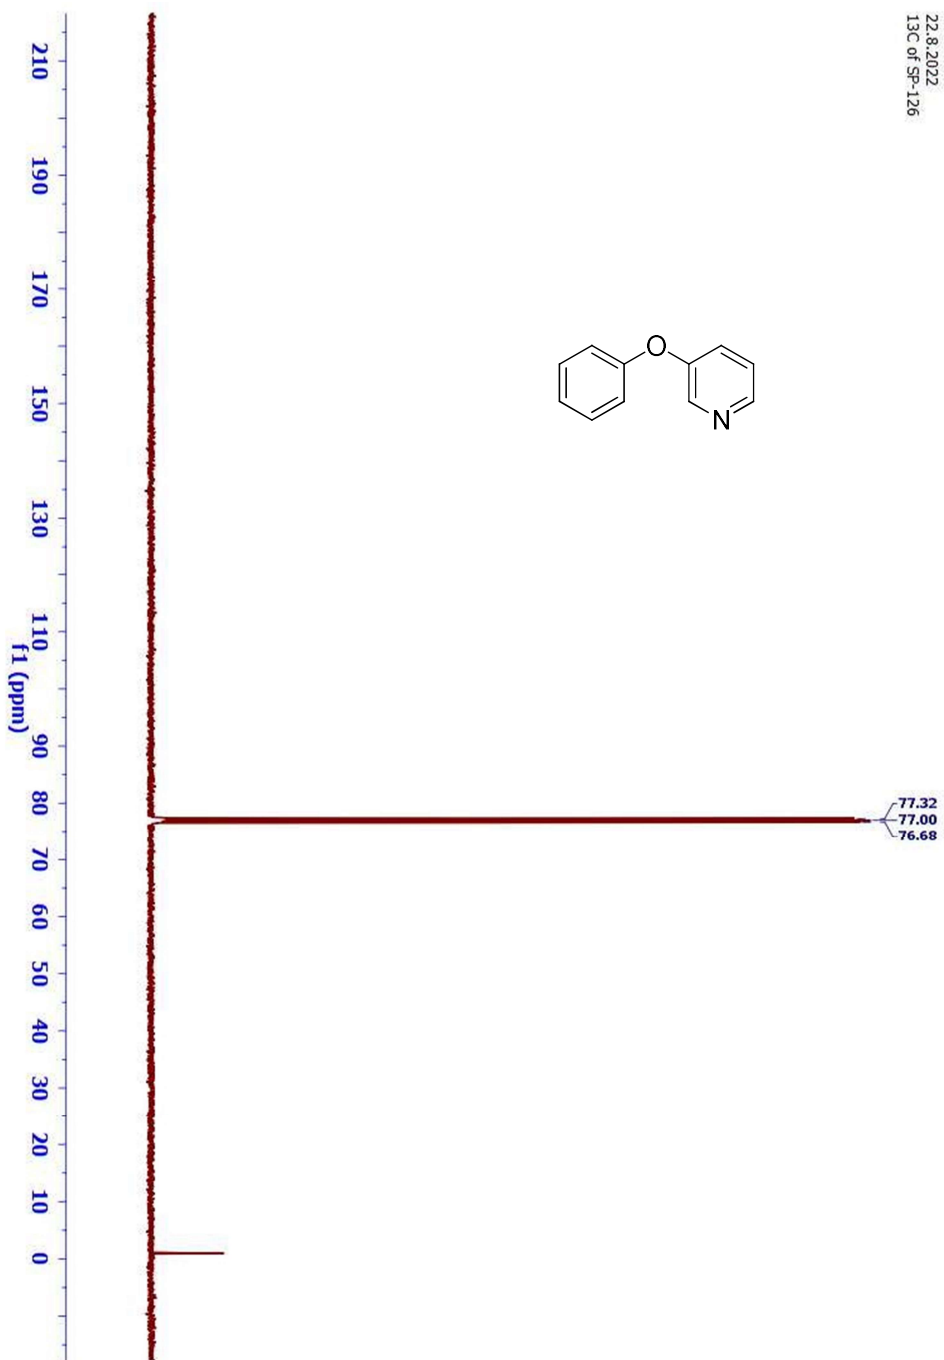

26.6.2022  
1H of SP-127

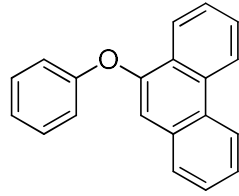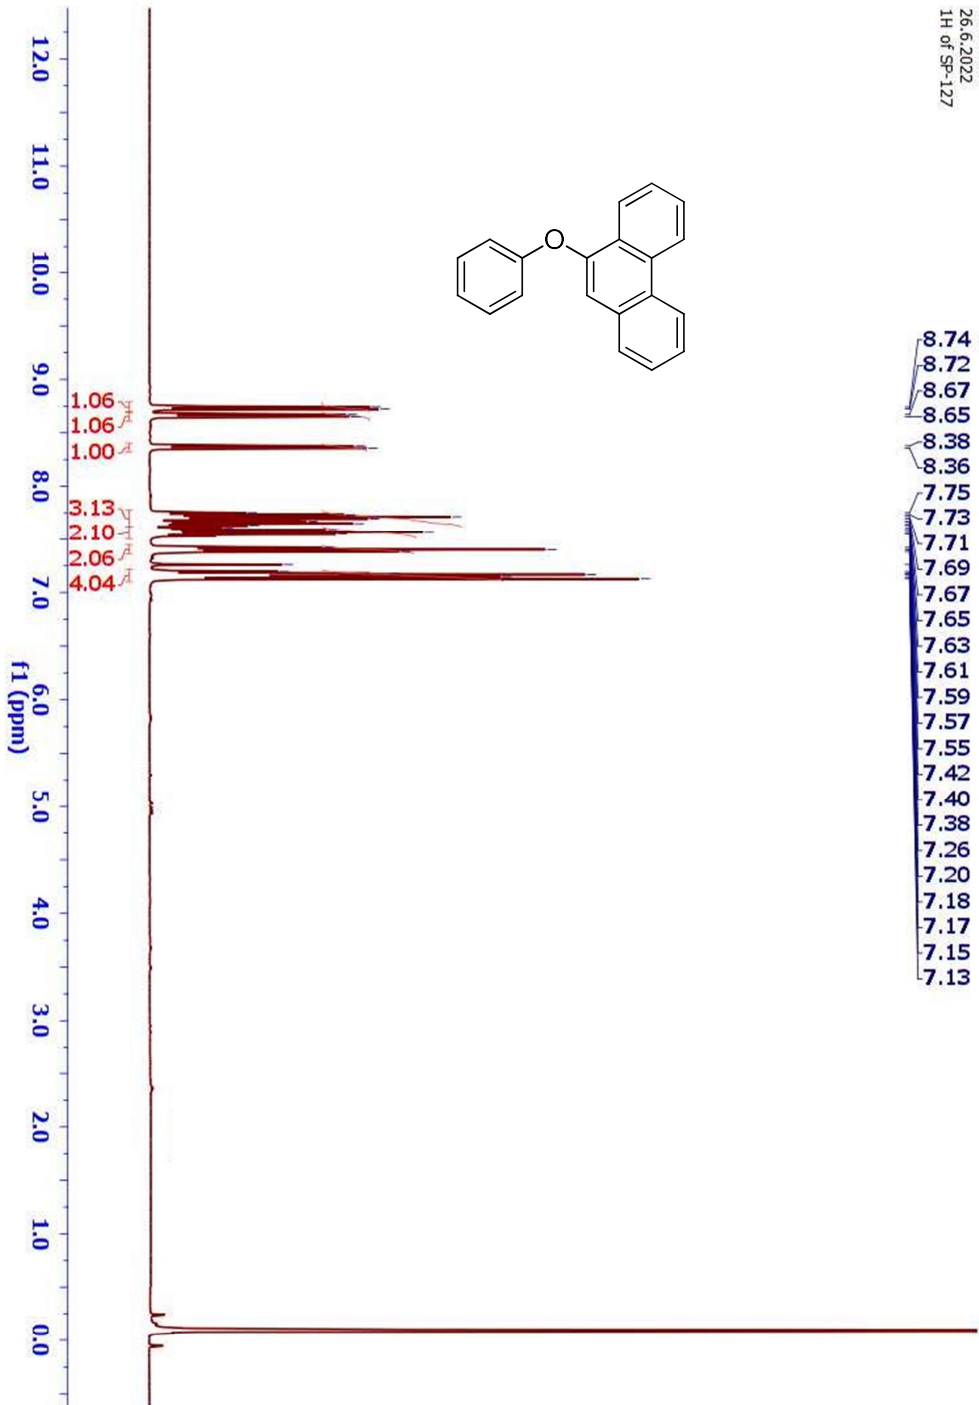

4.7.2022  
1H OF SP-127

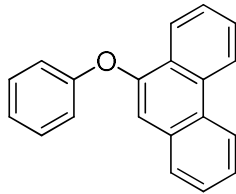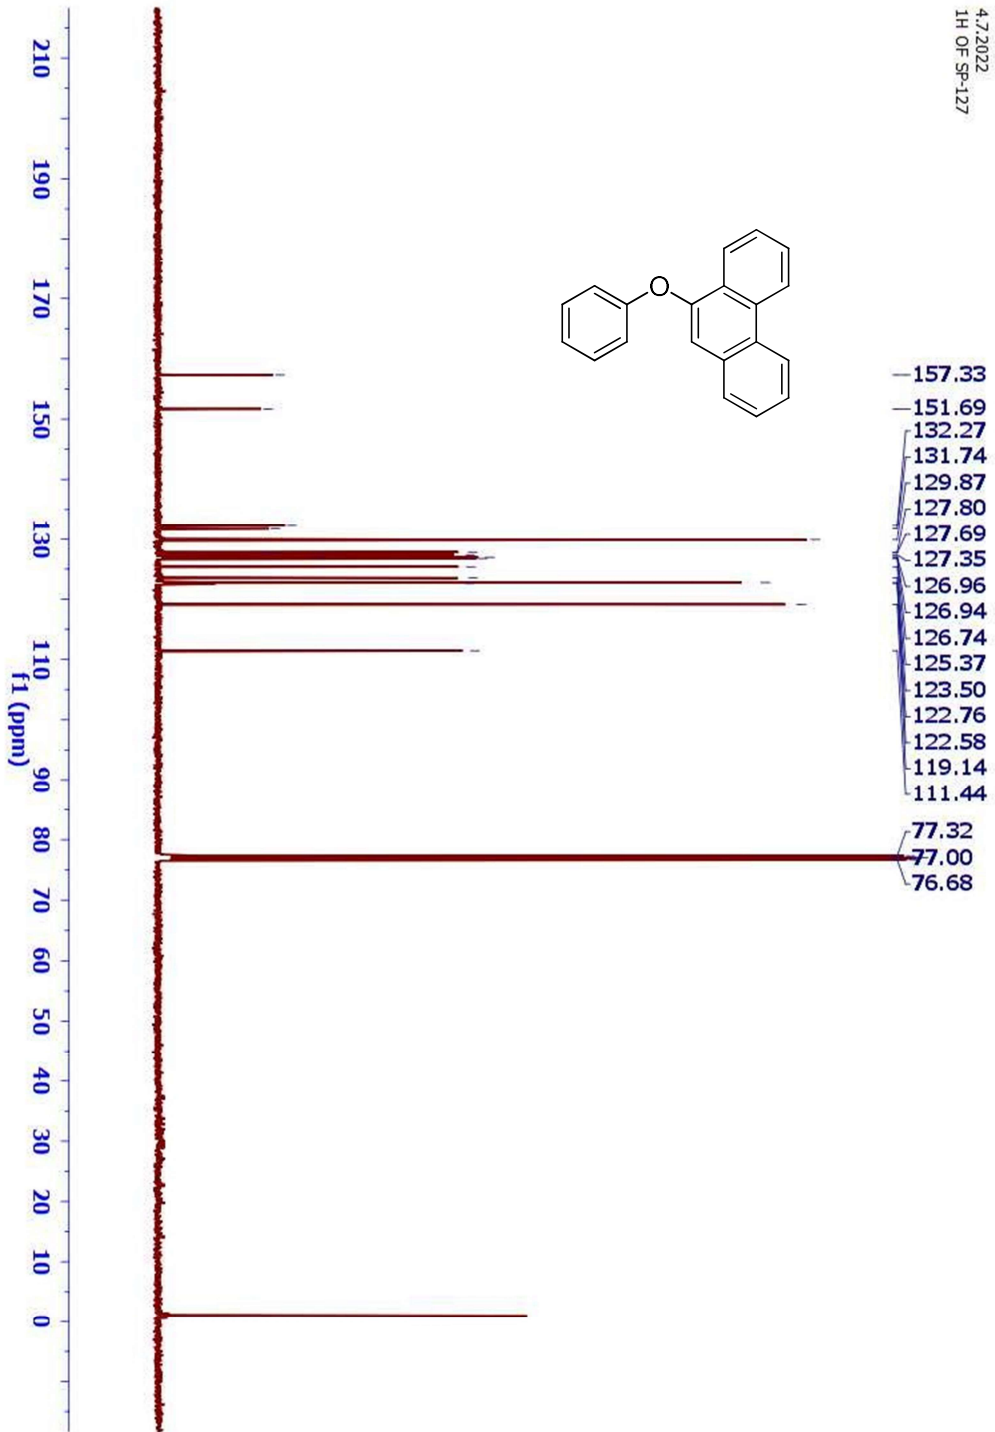

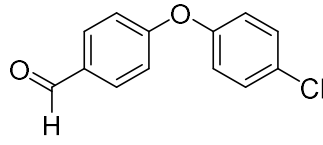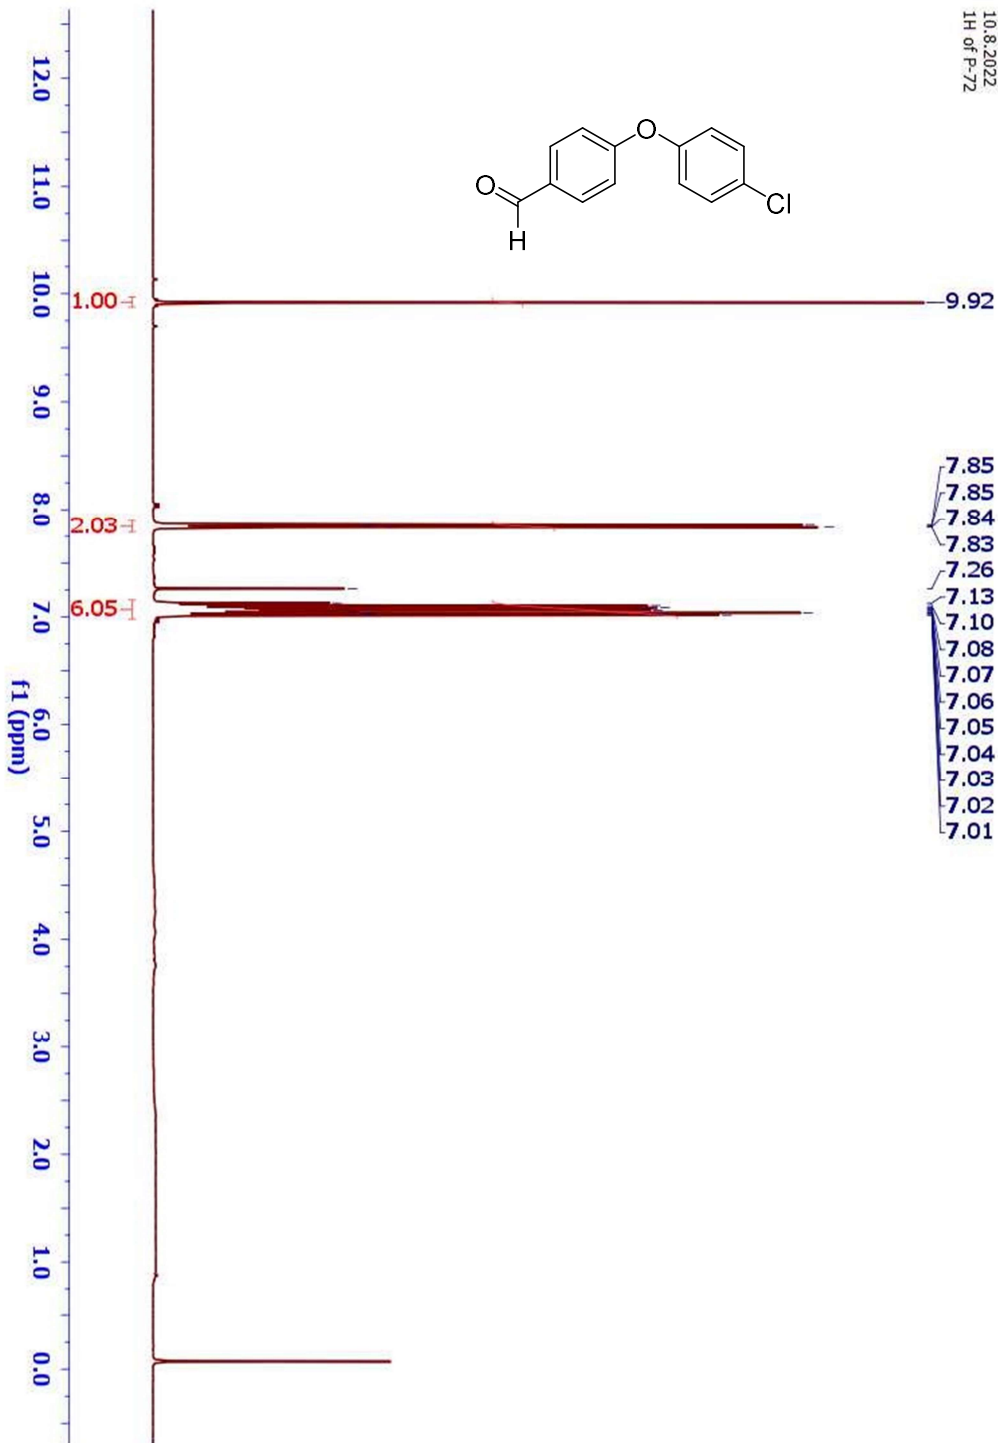

22:8:2022  
13C of P-72

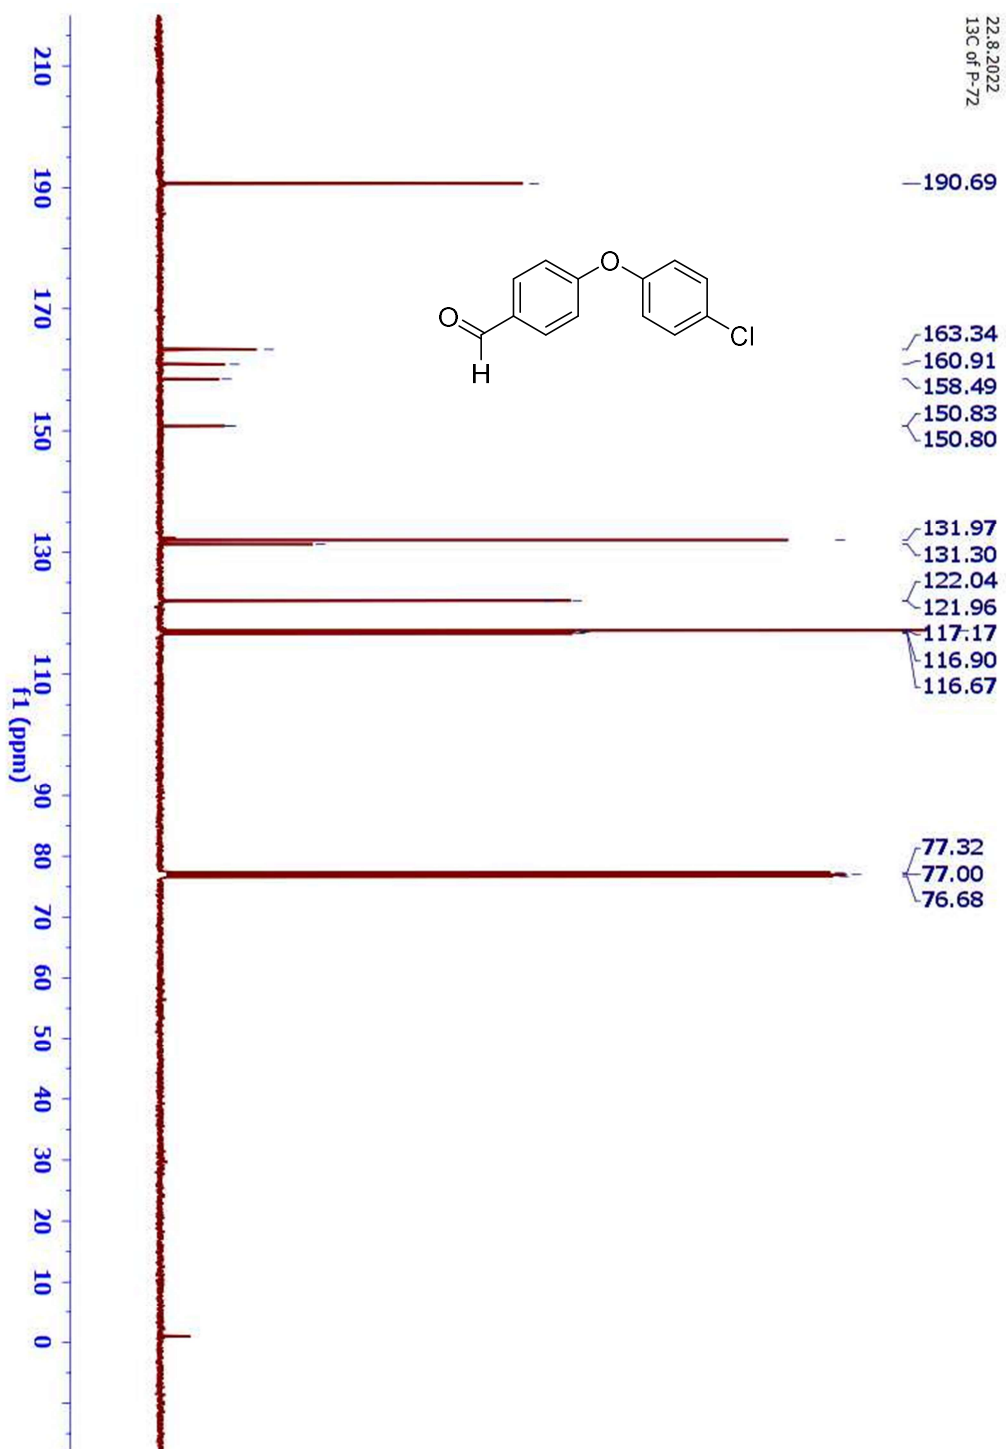

Main File\_C-0  
1H of PKB-705(a) 21.4.2022

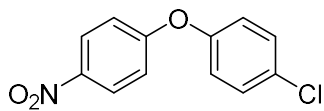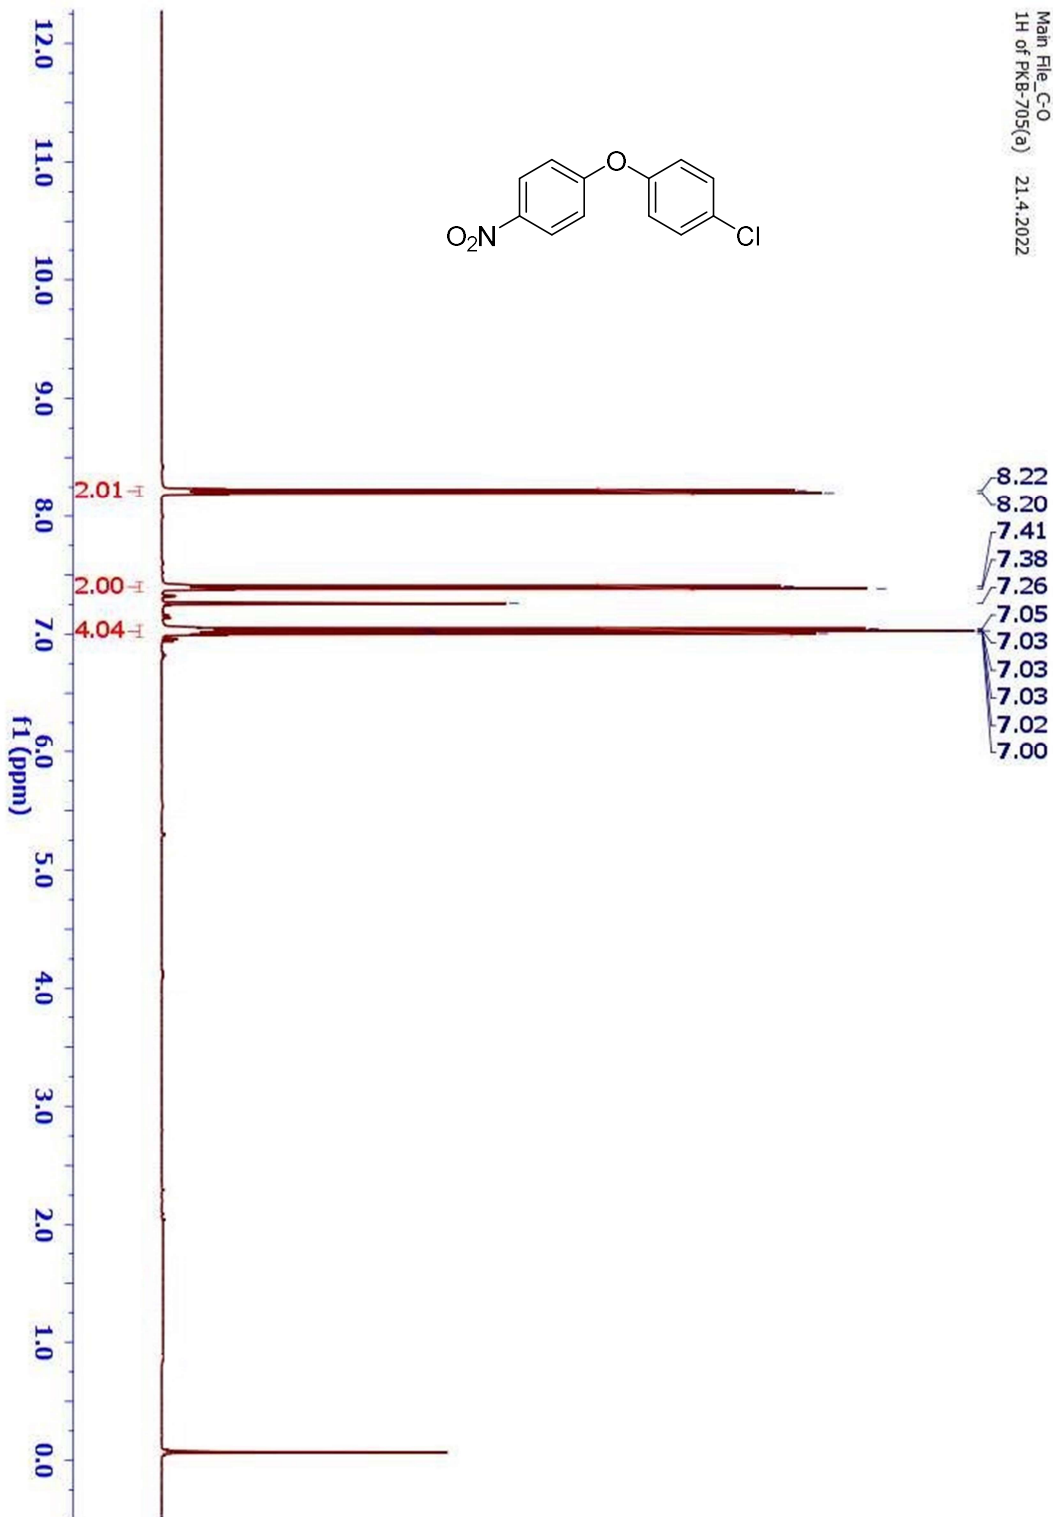

12.5.2022  
13C of SS-705(A)

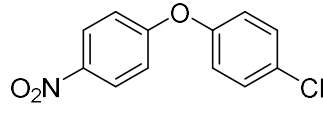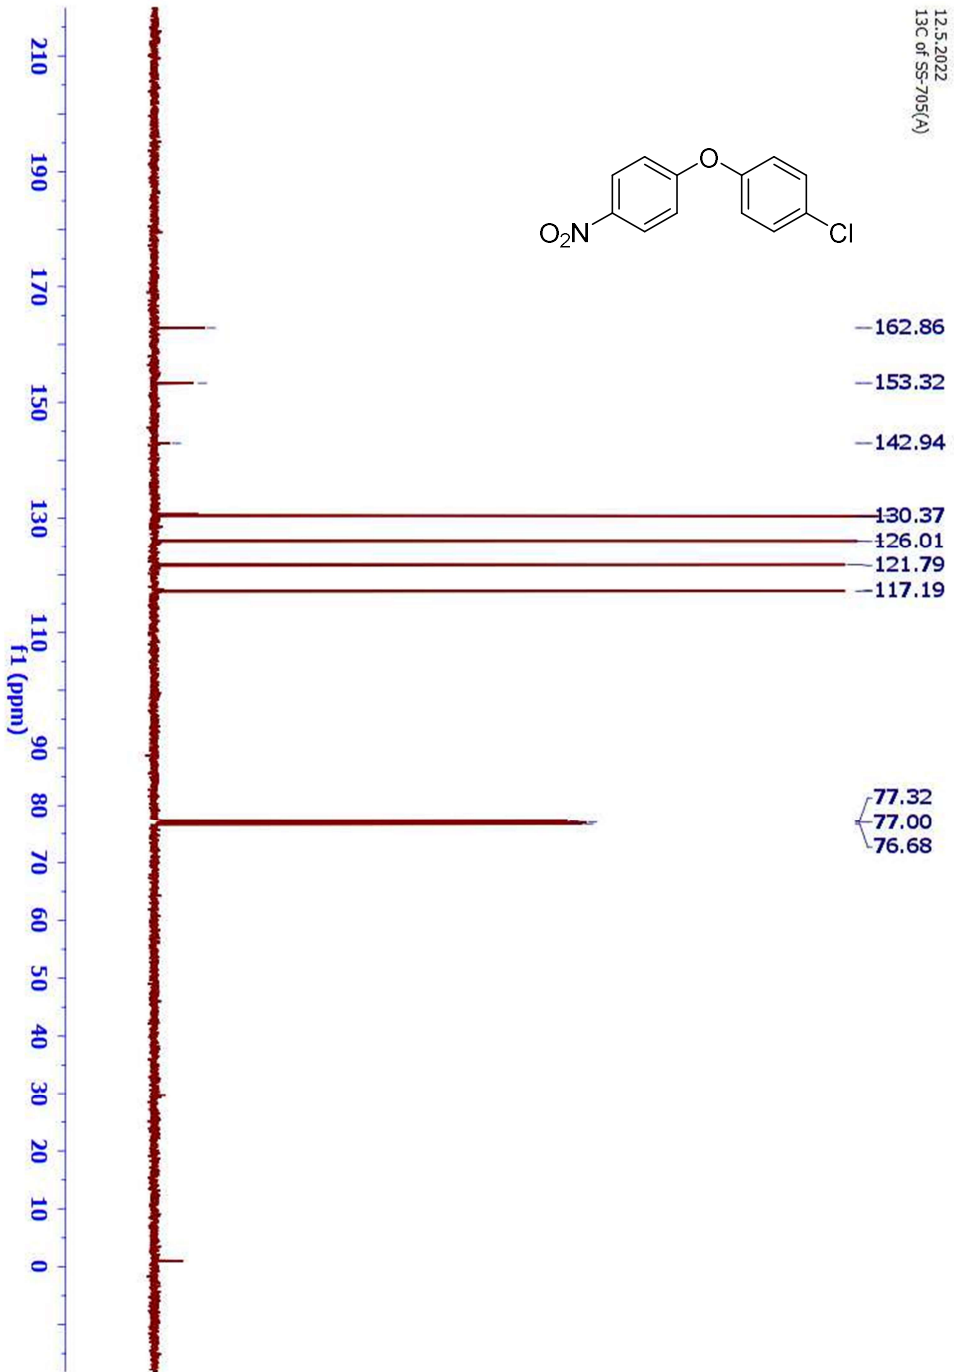



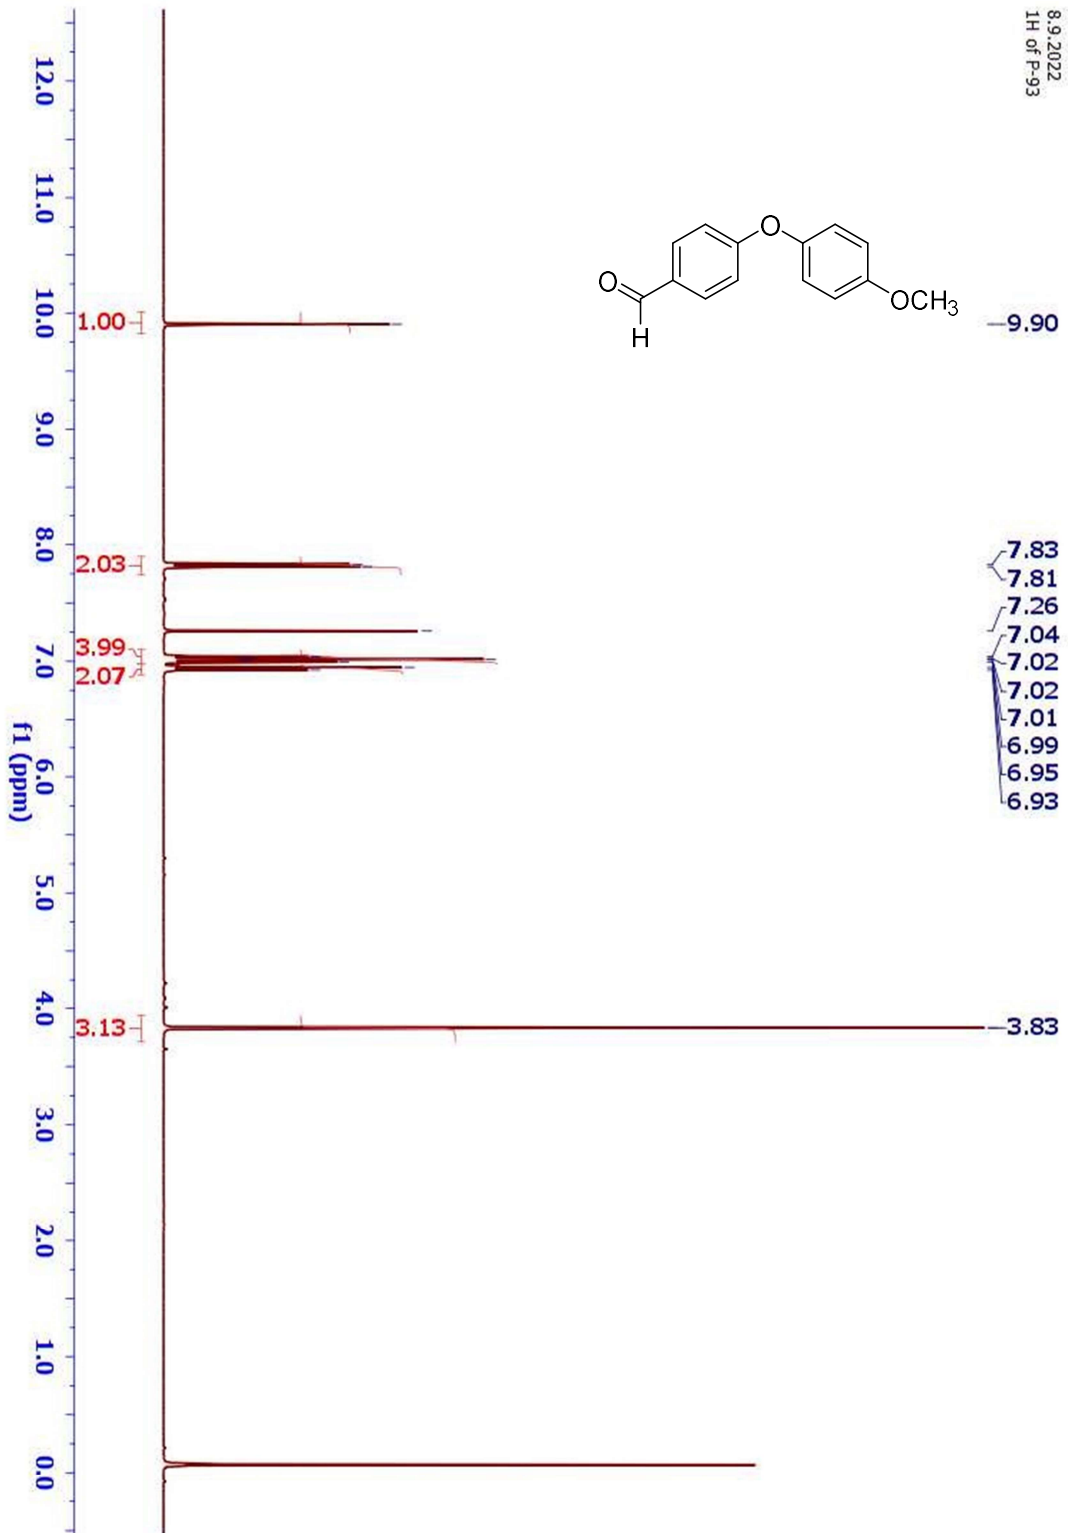

3.10.2022  
1H of P-93

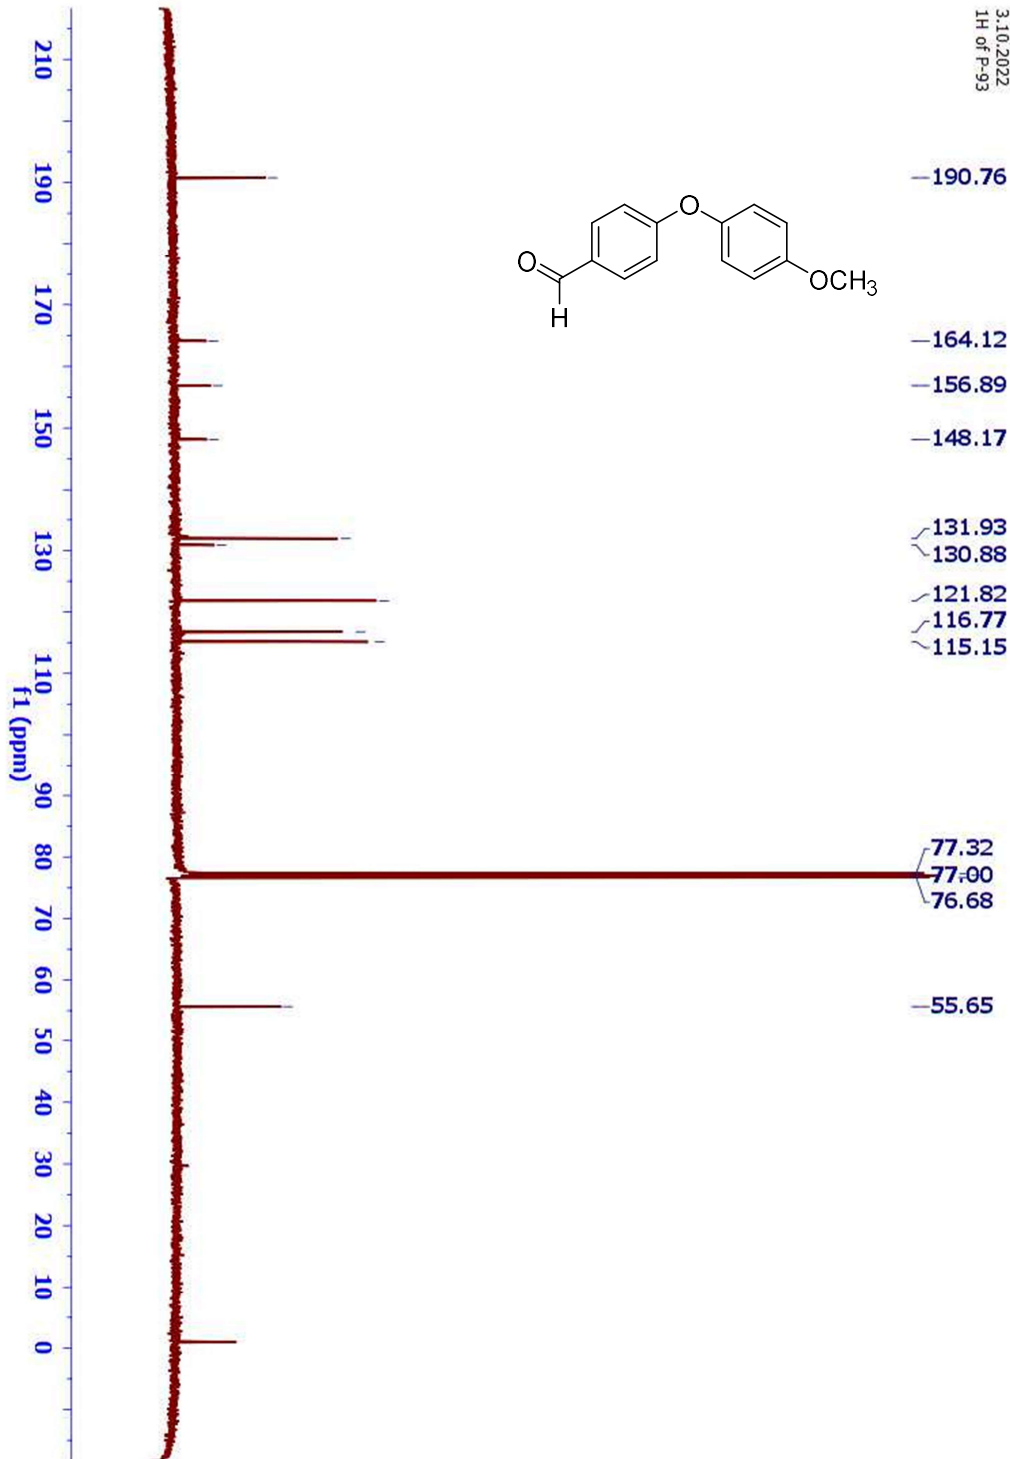

8.9.2022  
1H of P-92

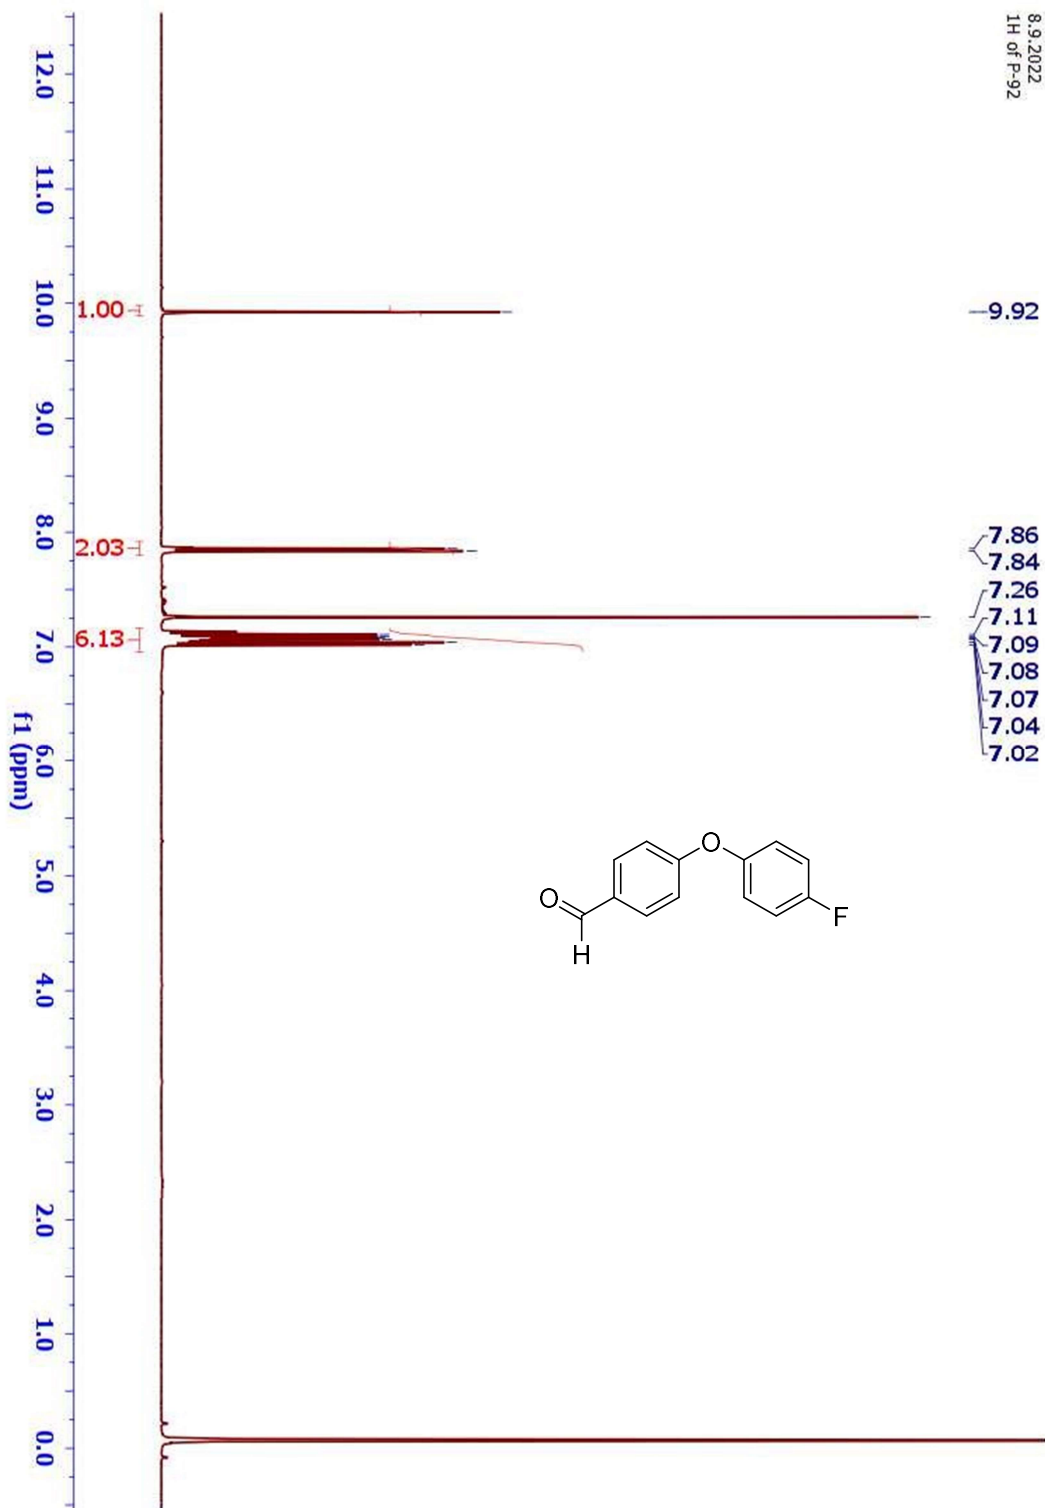

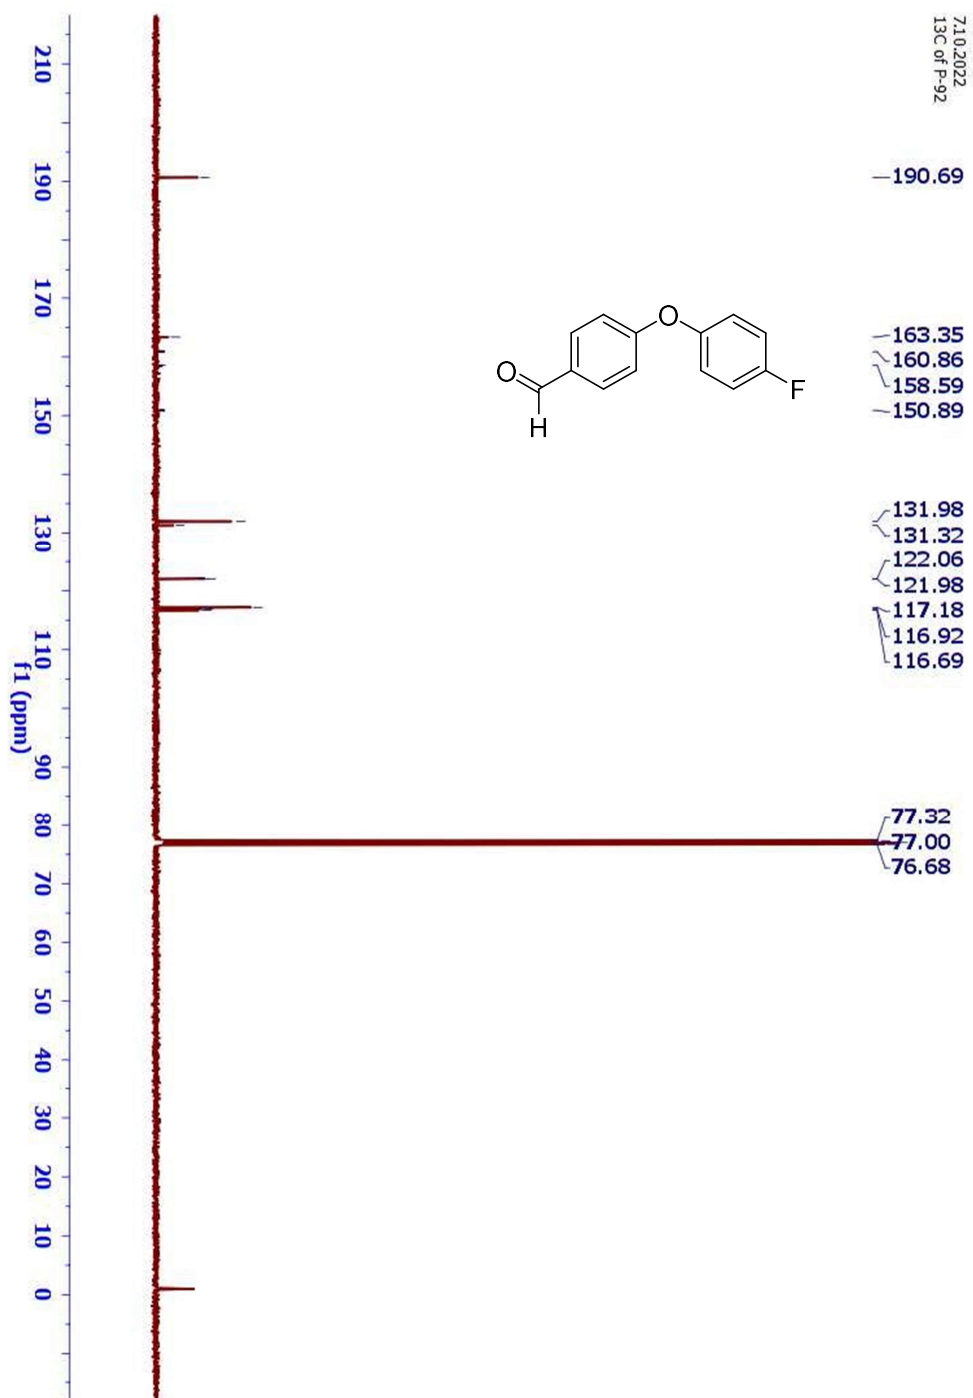

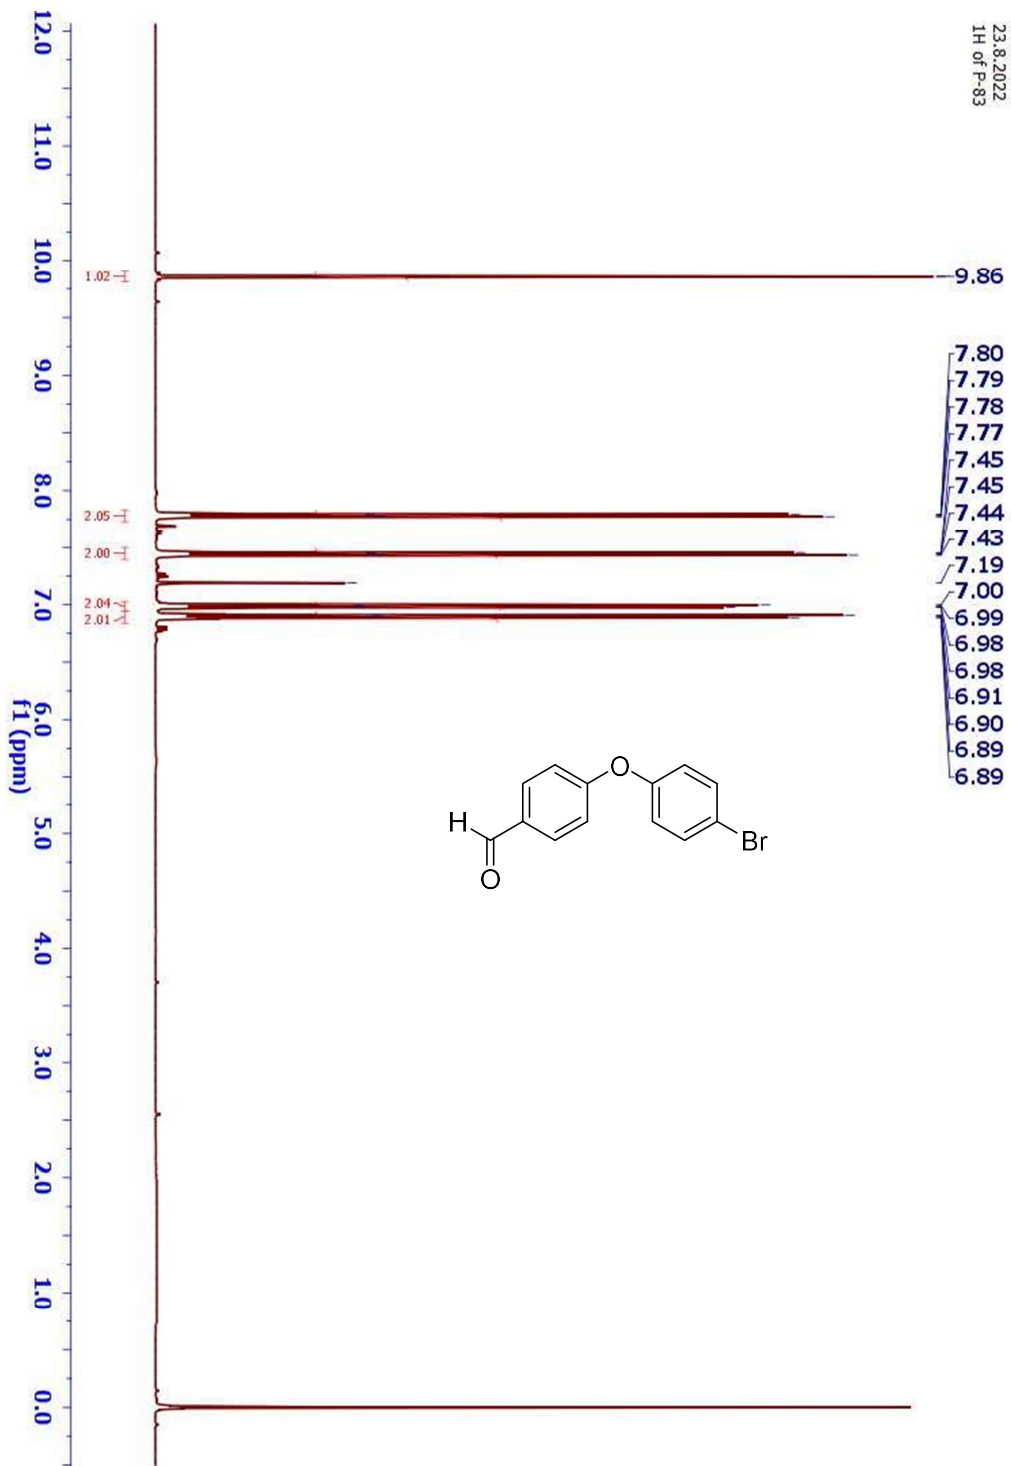

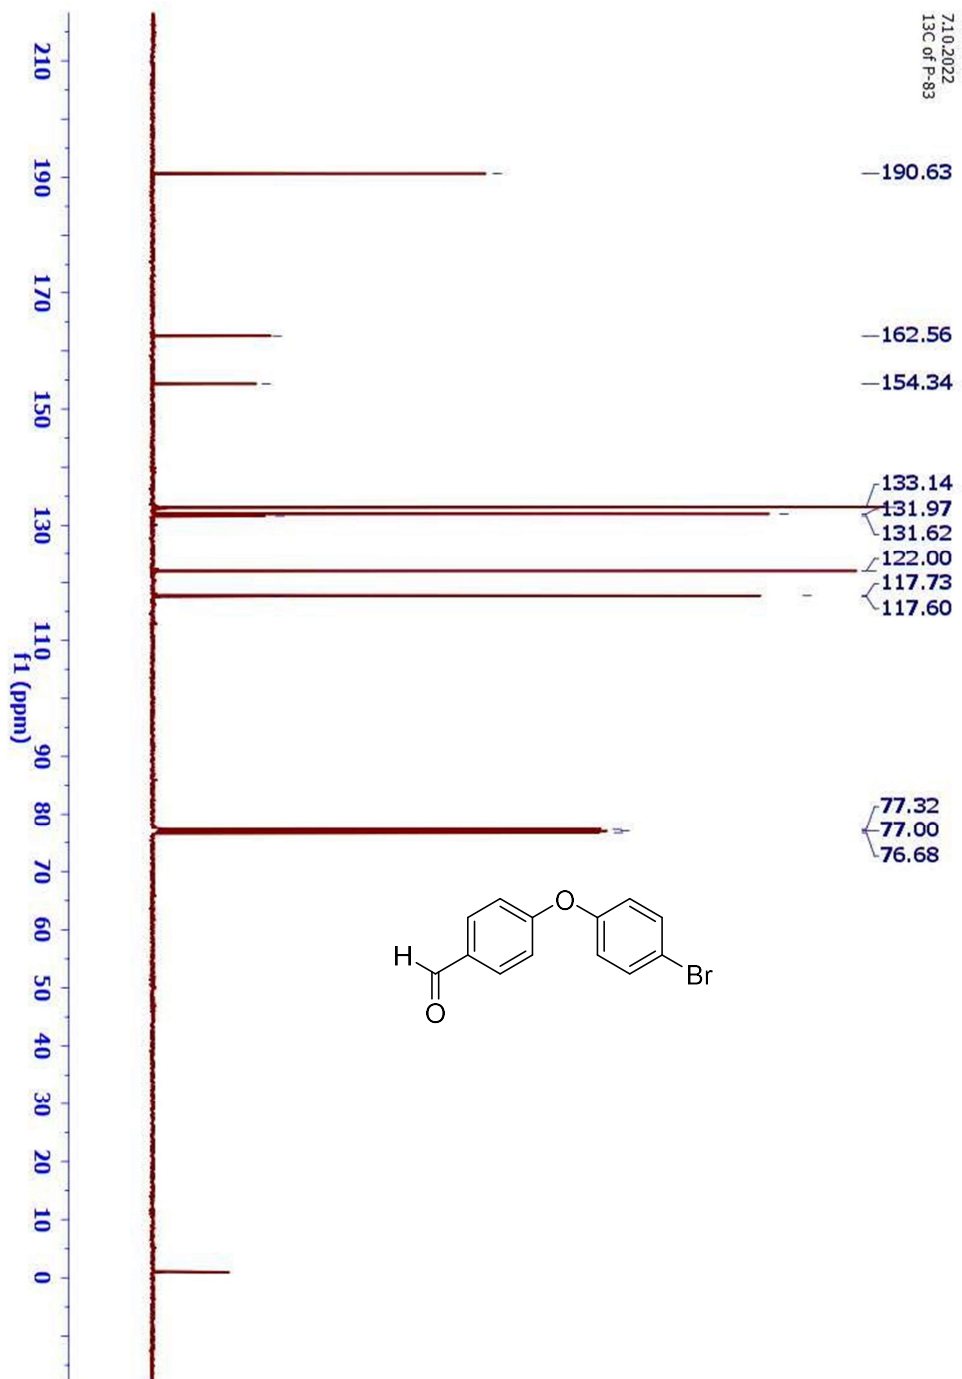

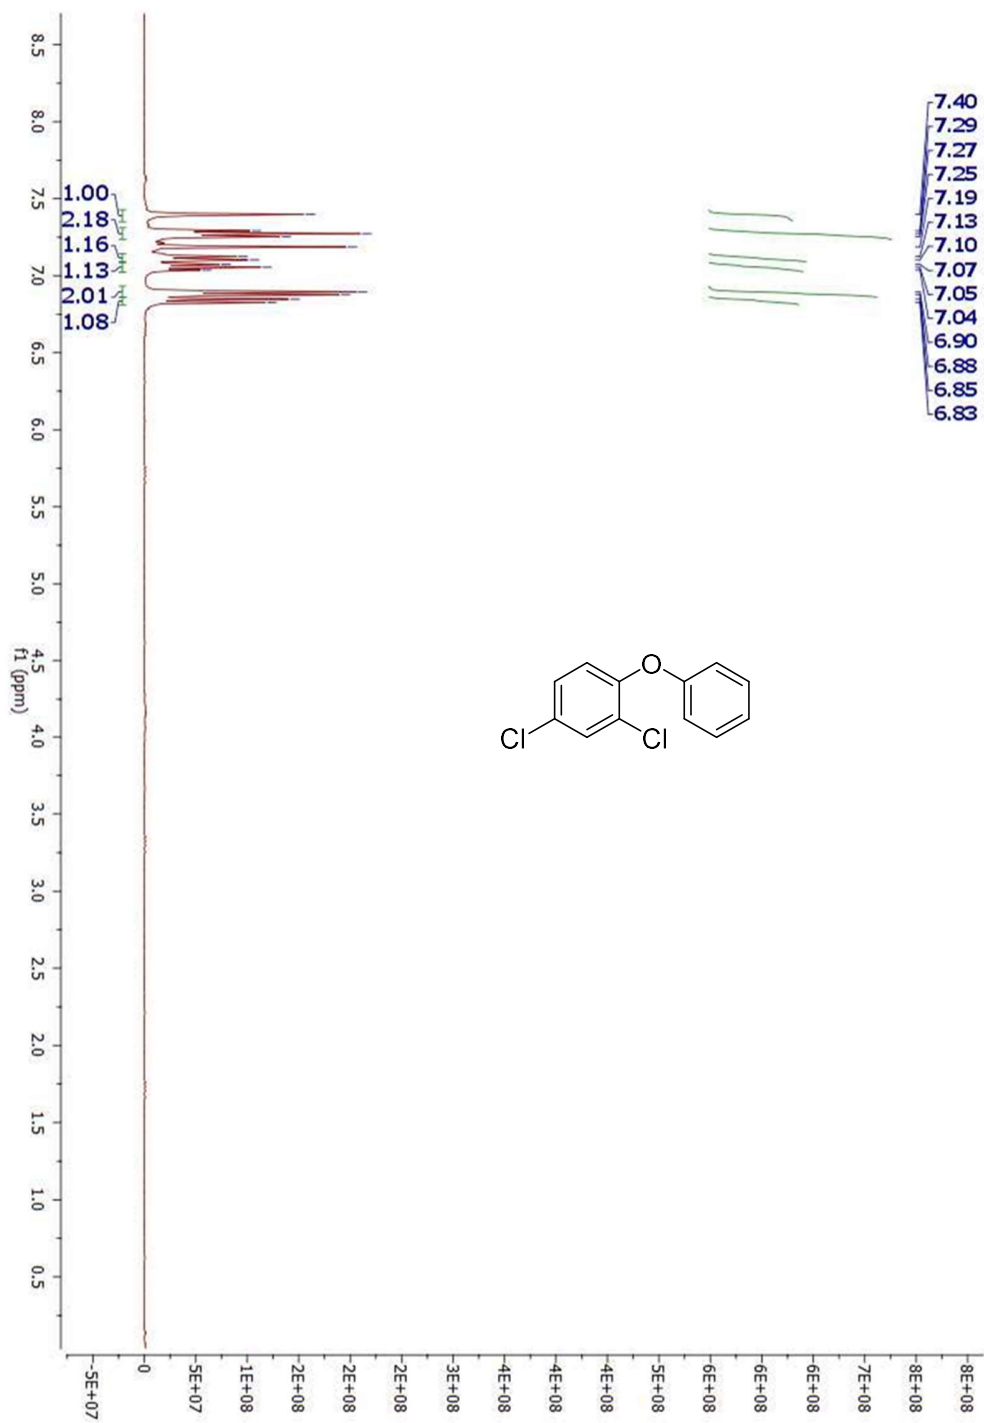

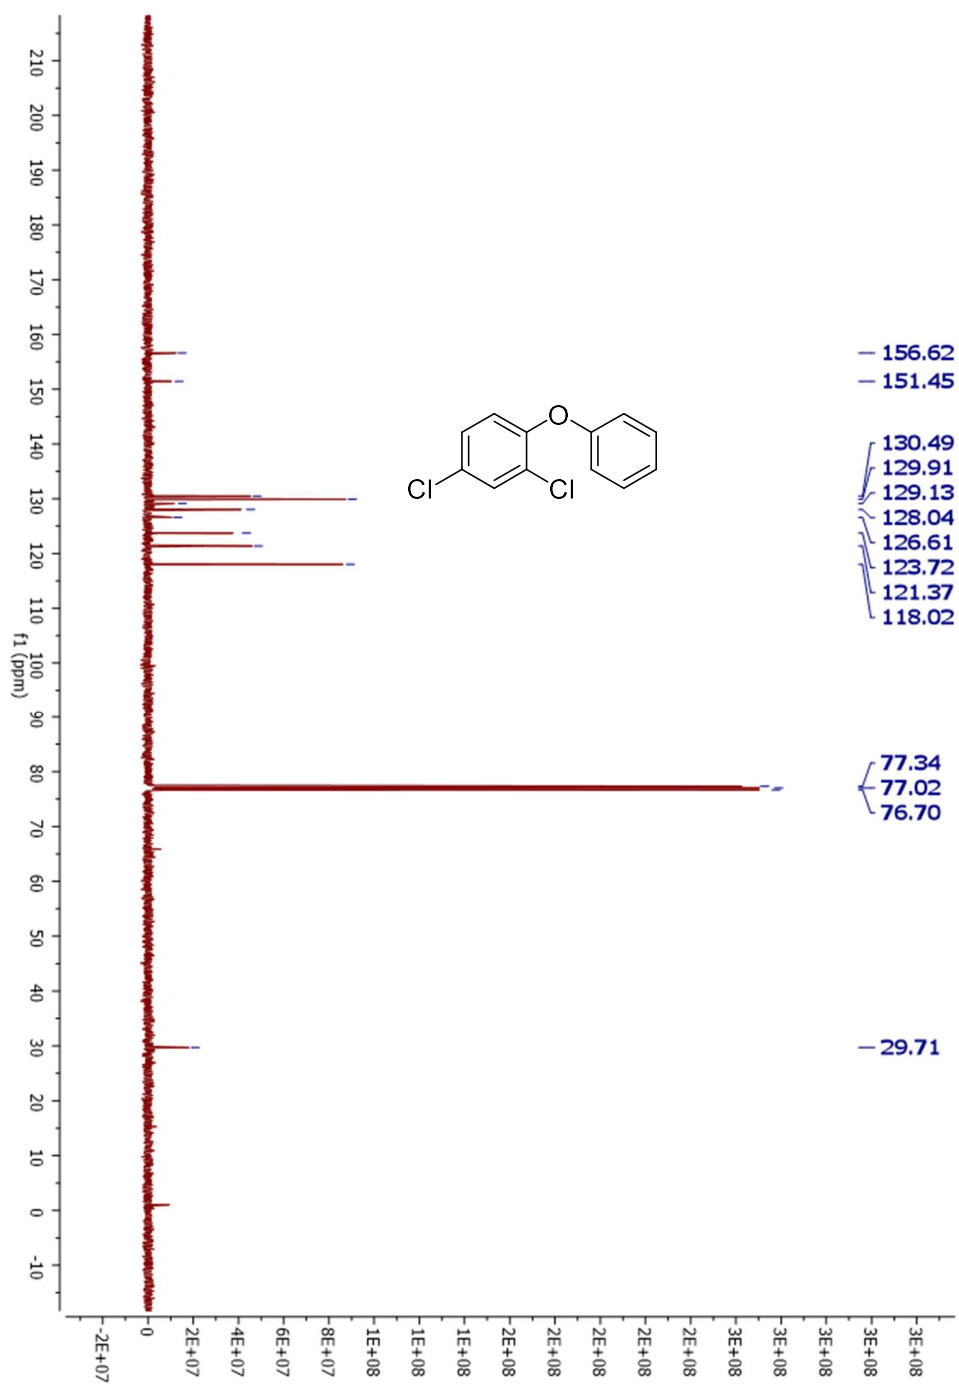



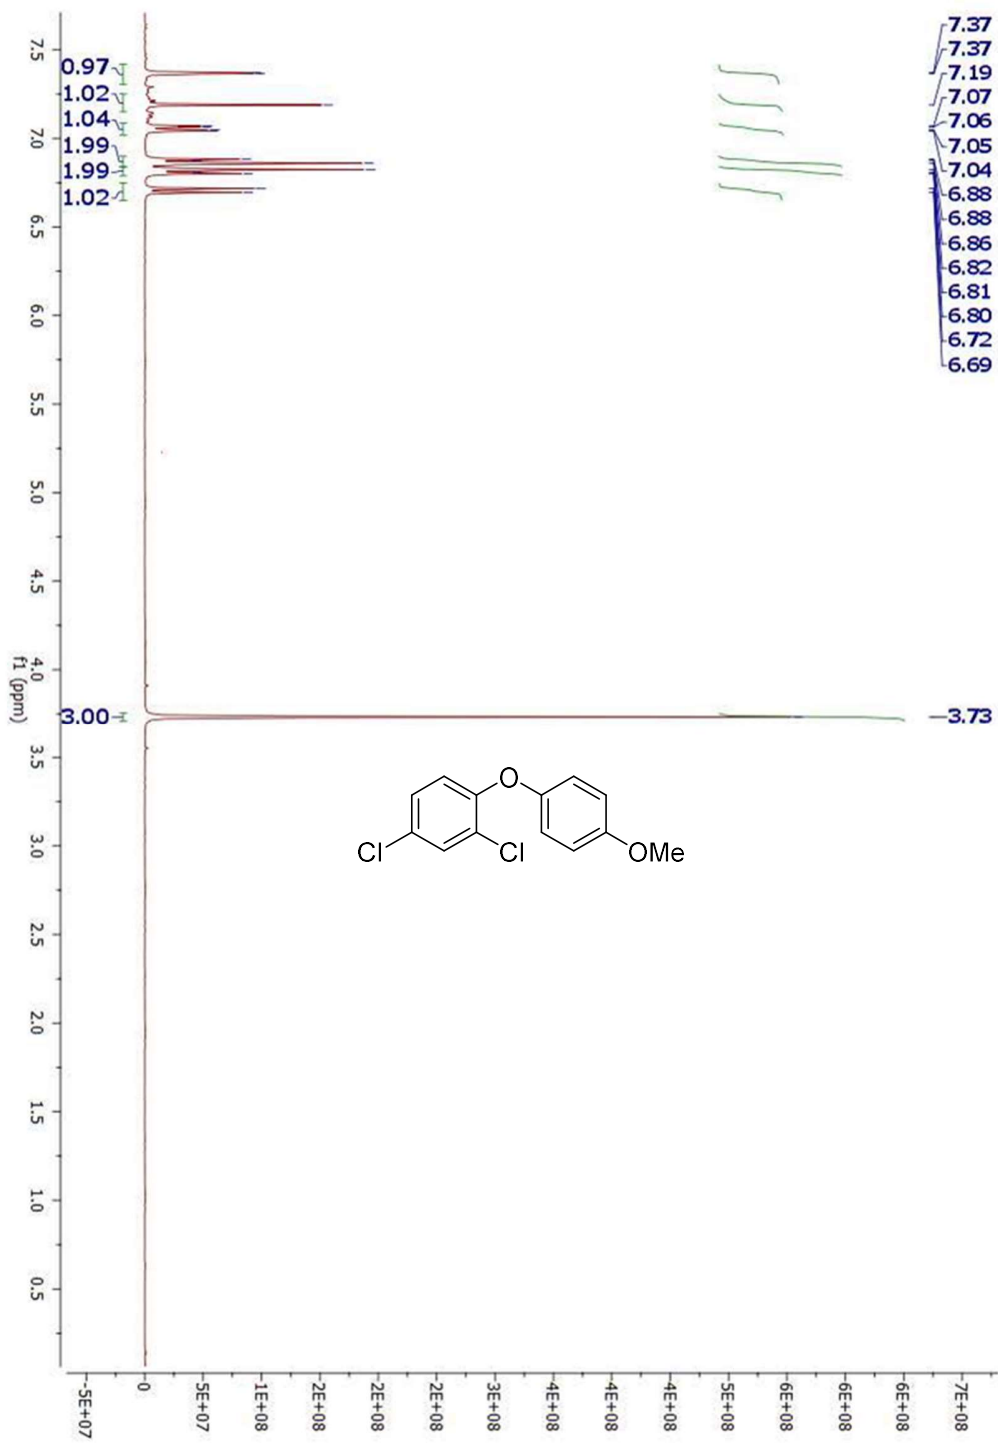

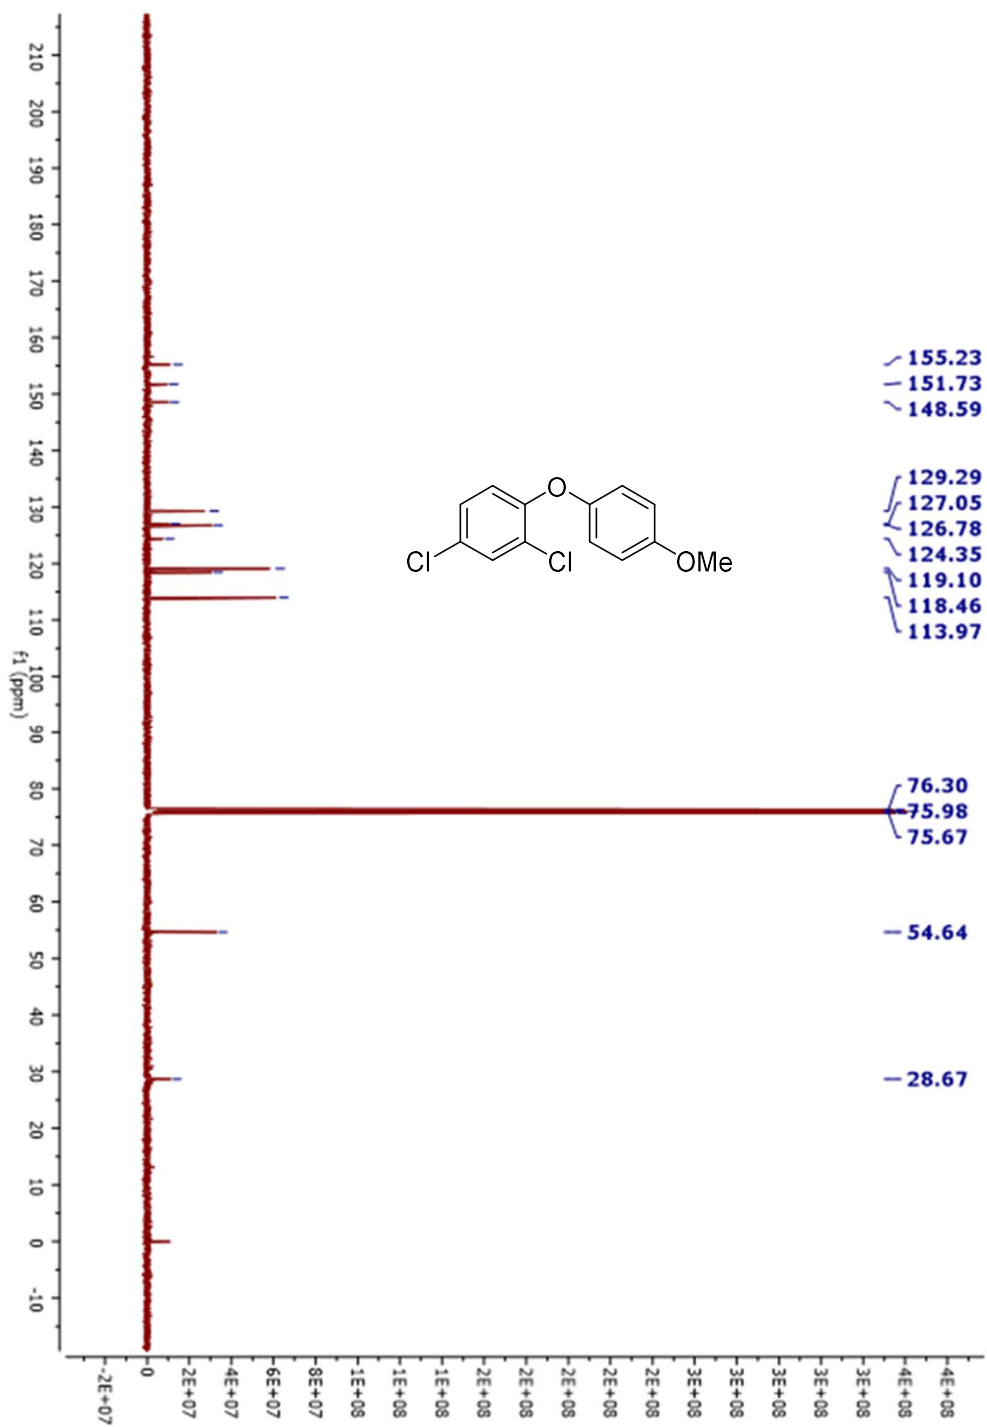

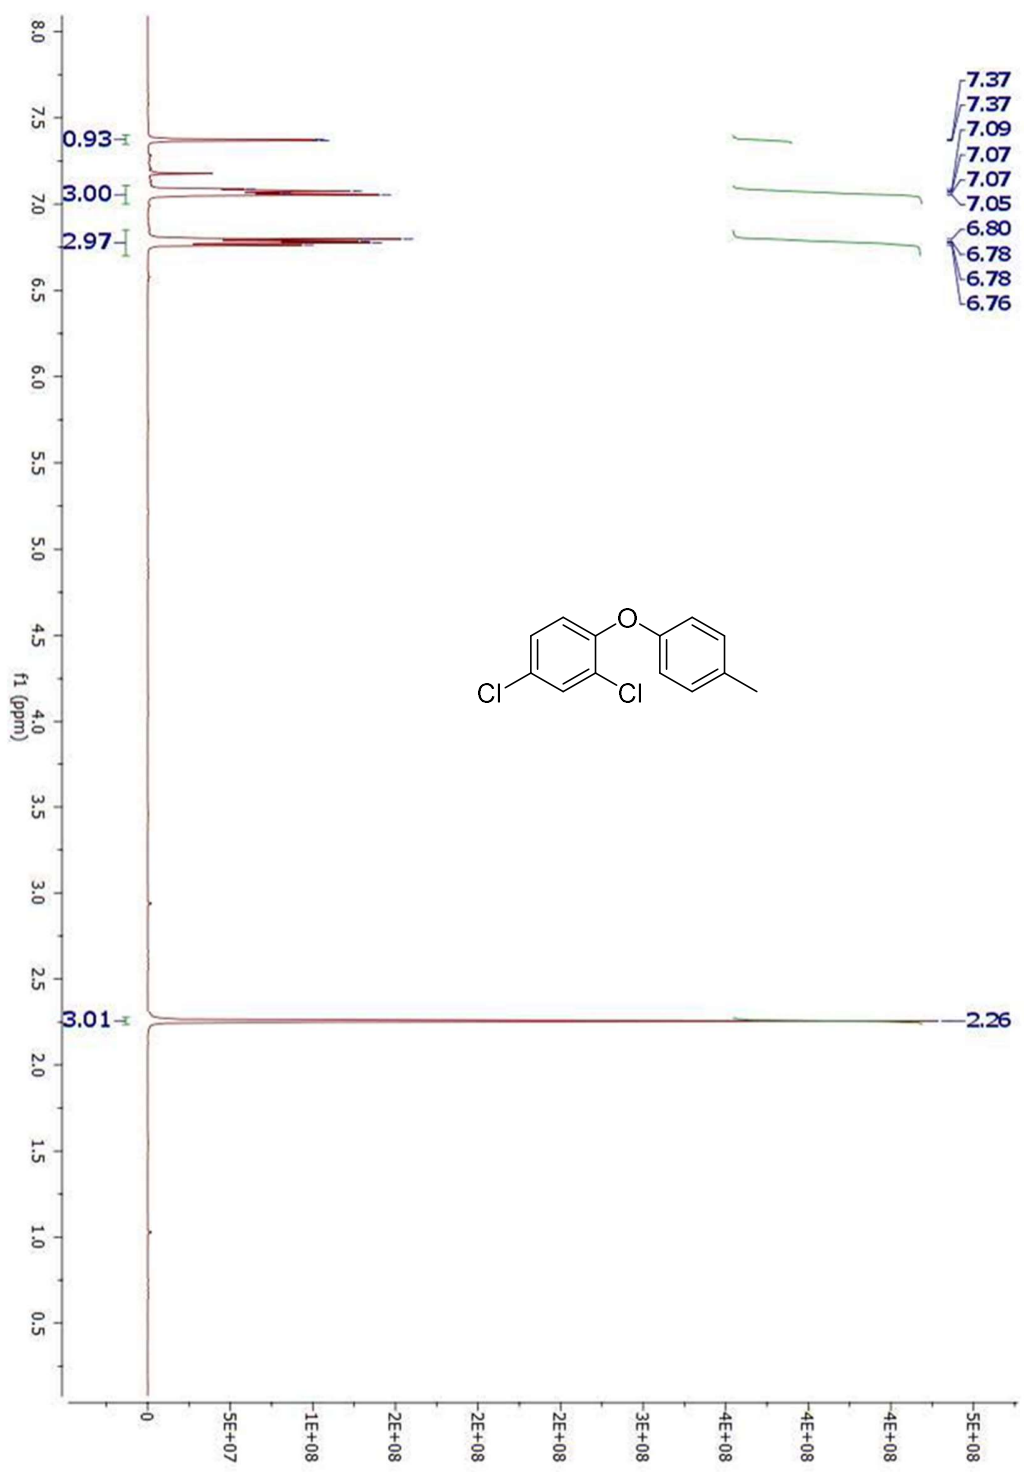

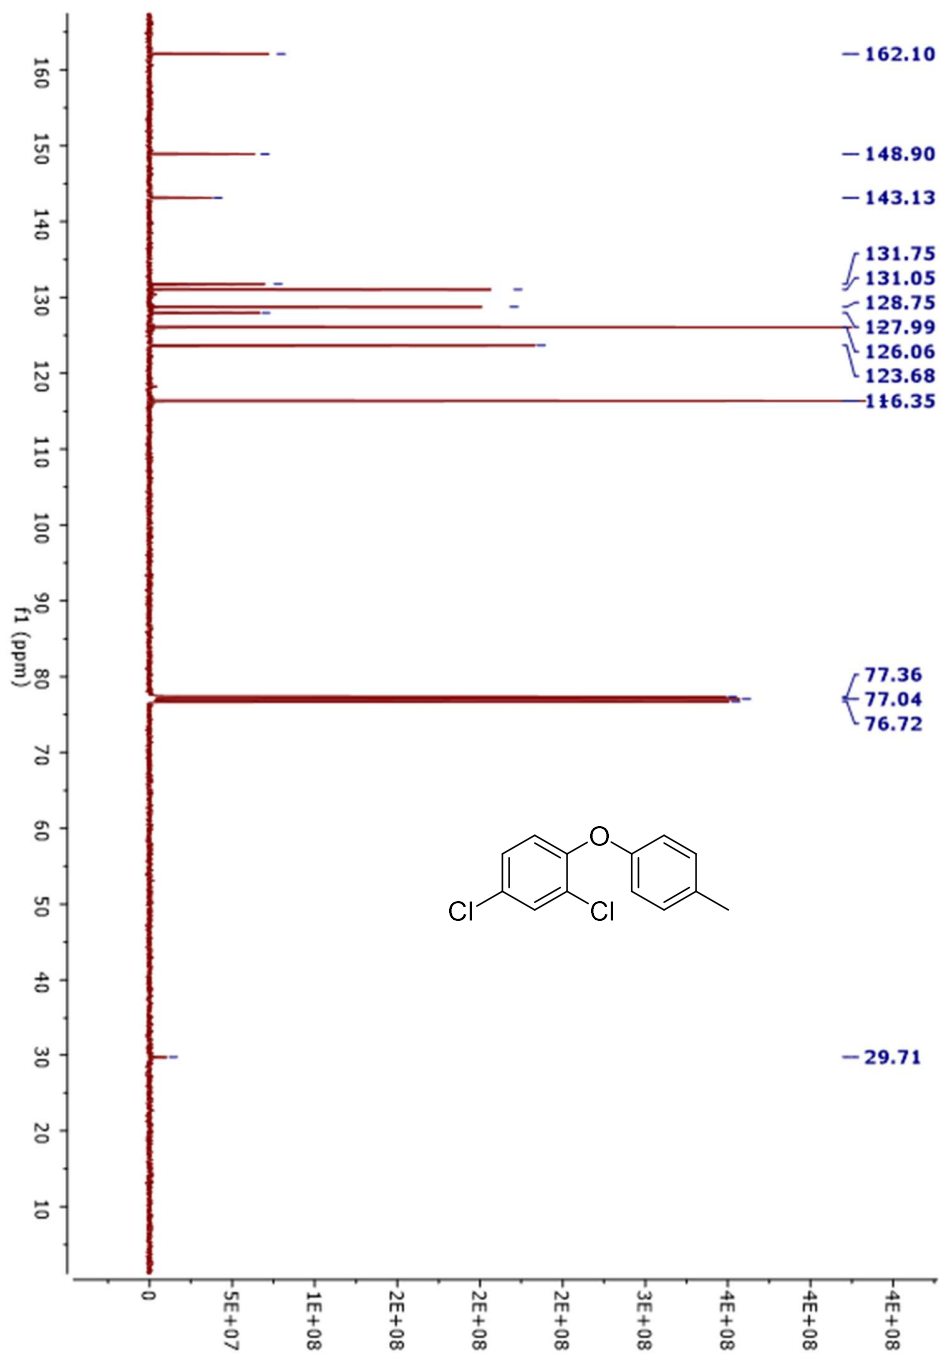

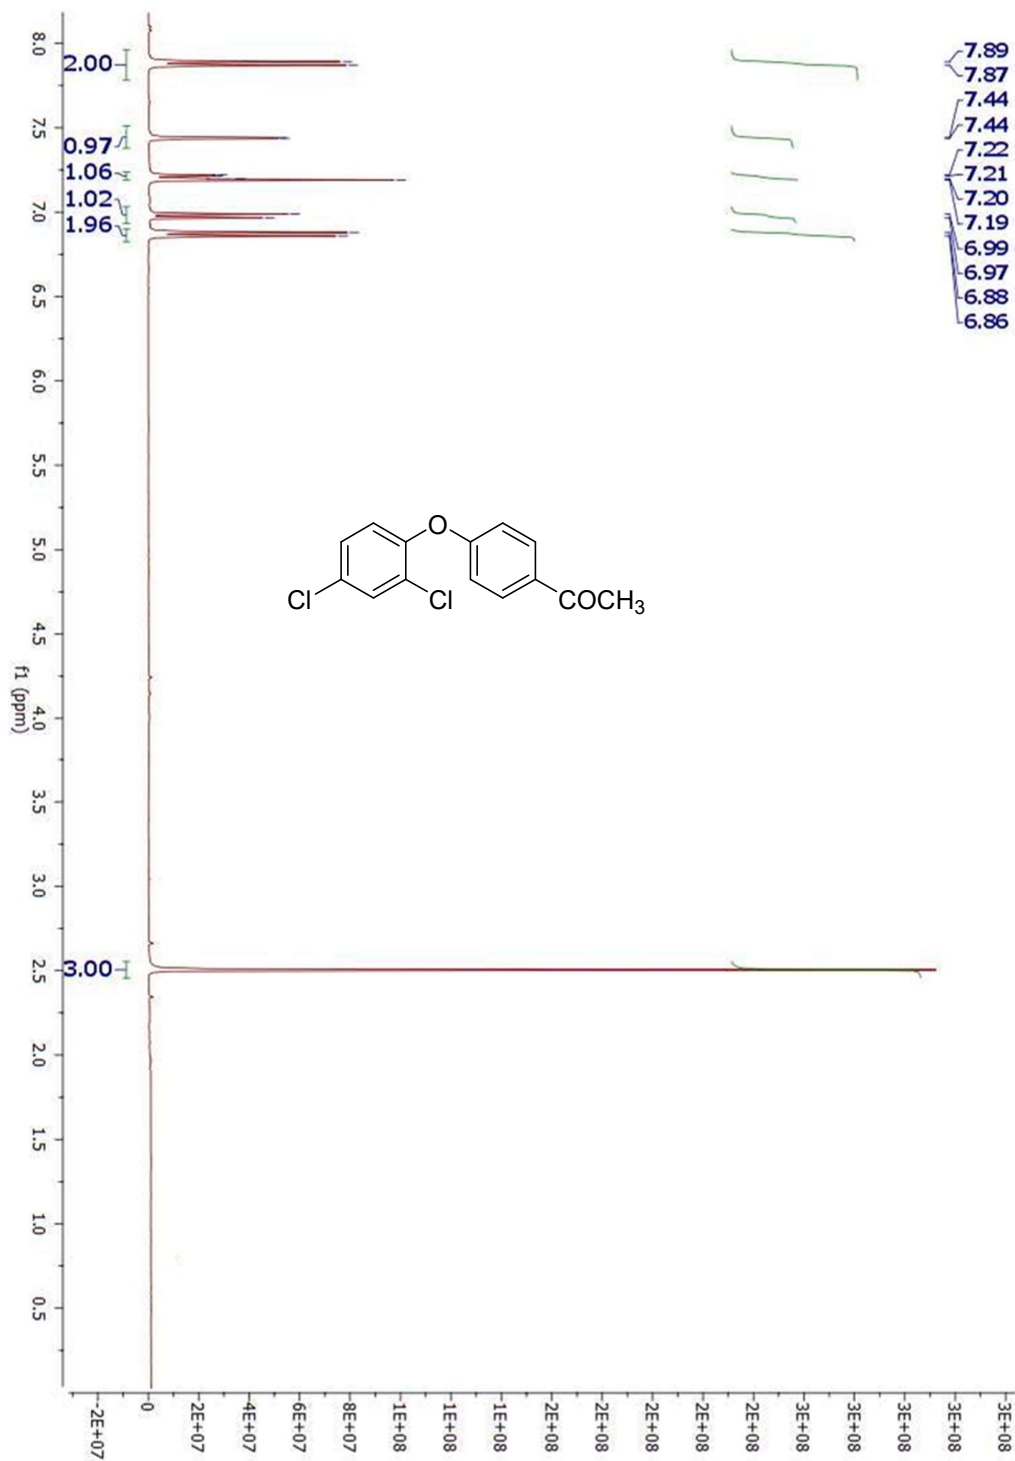

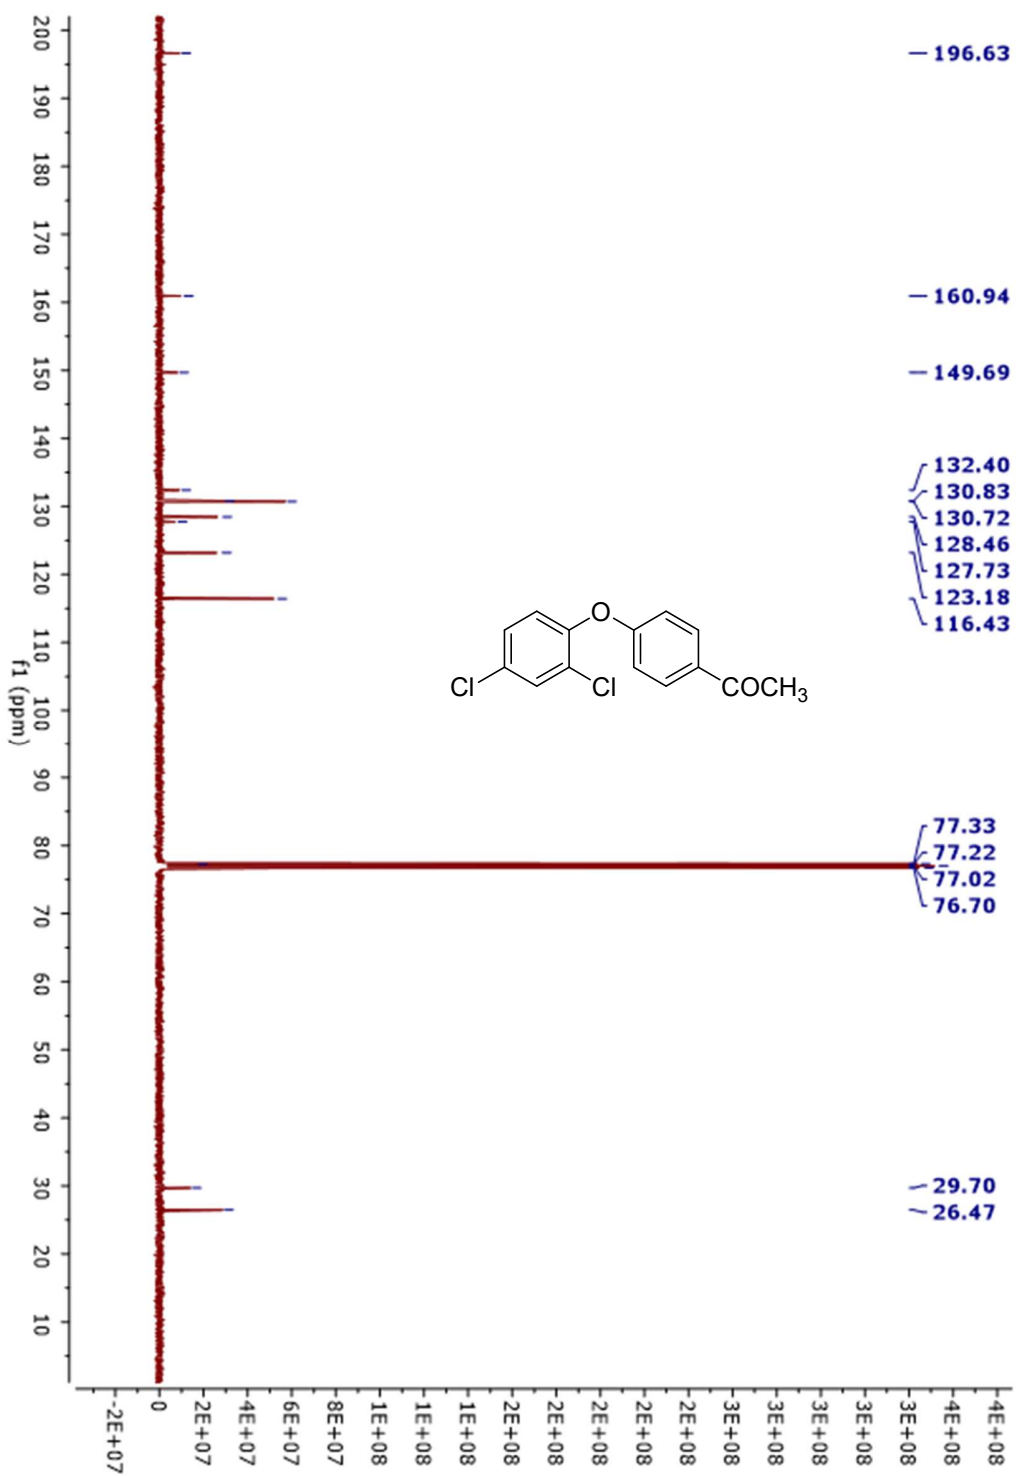

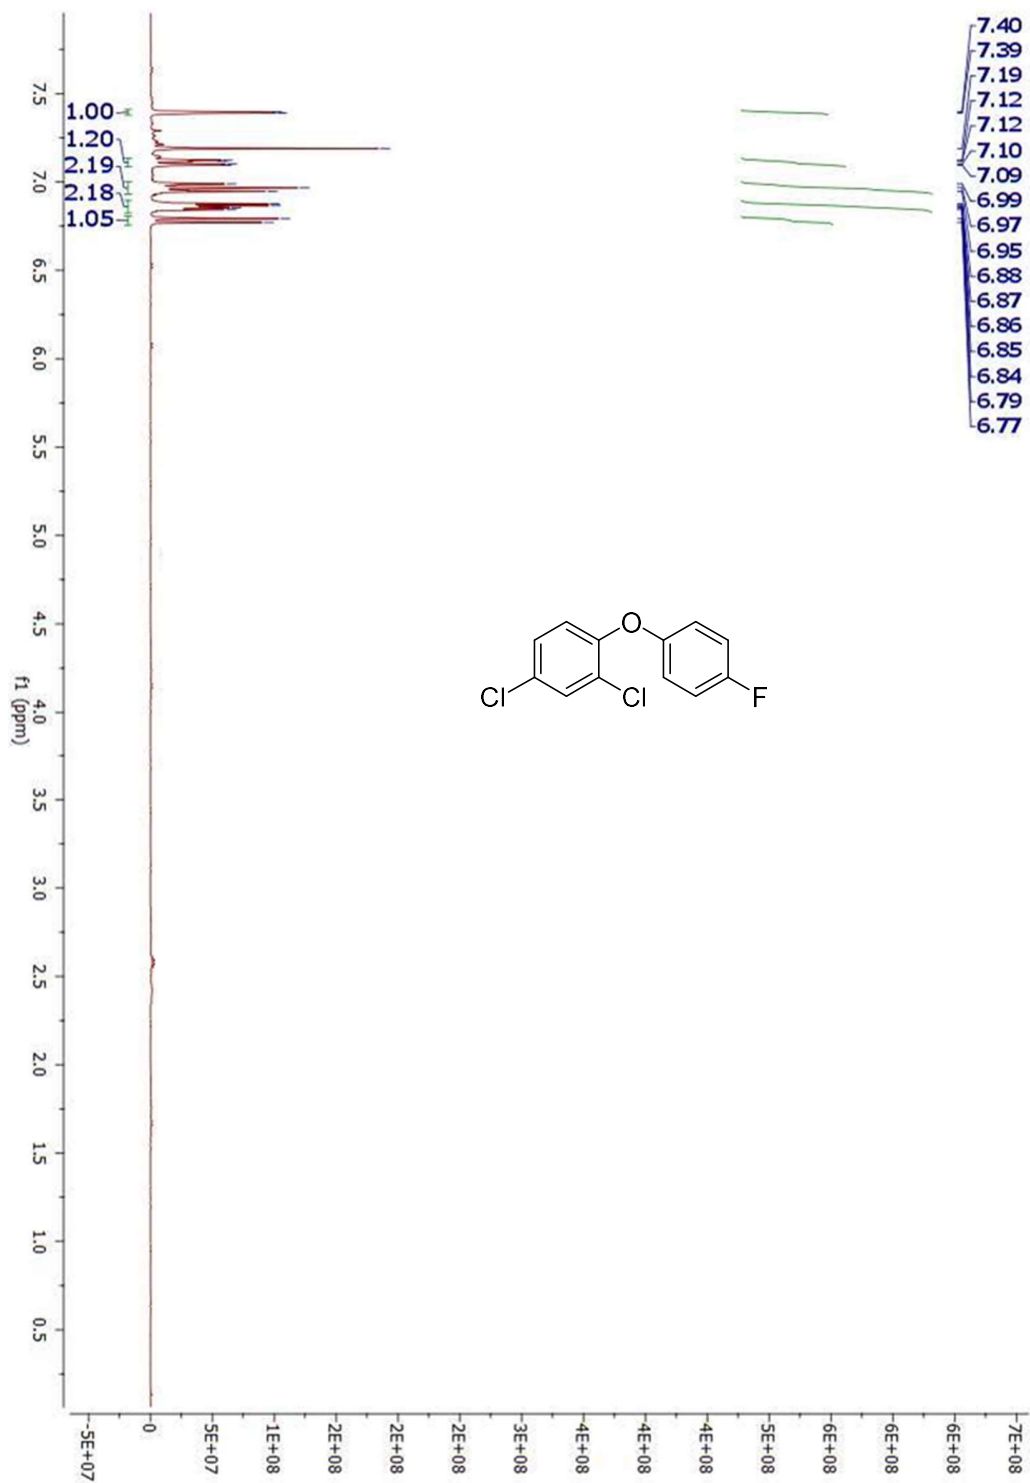

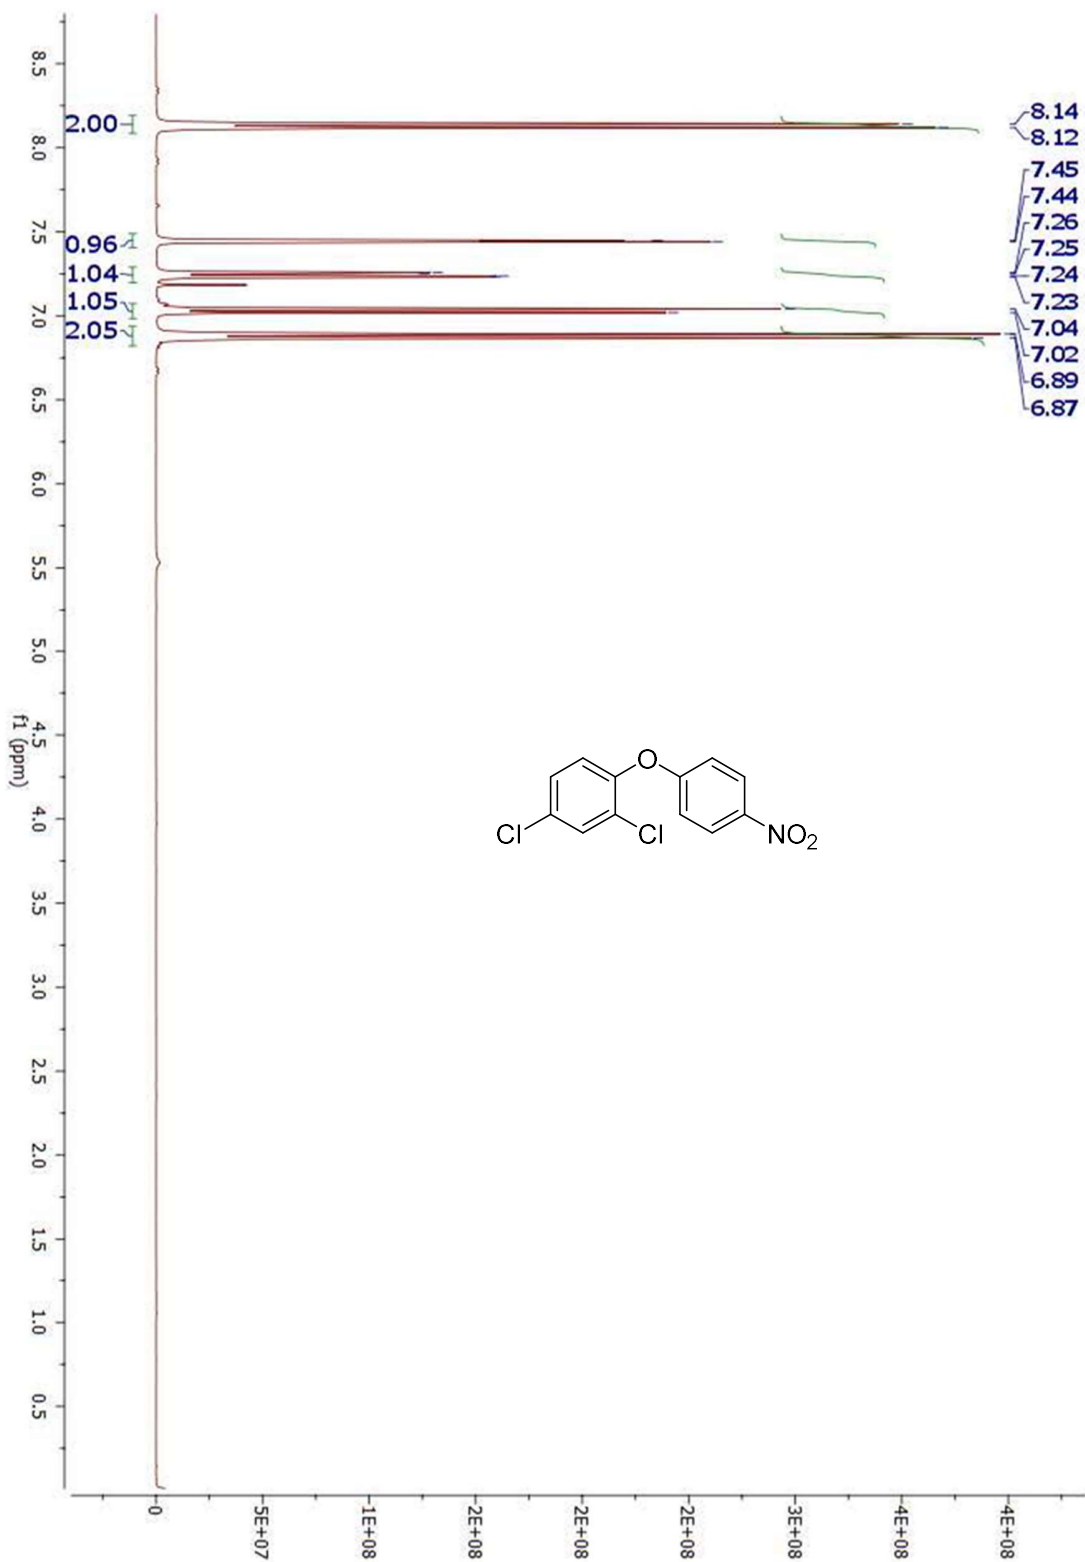



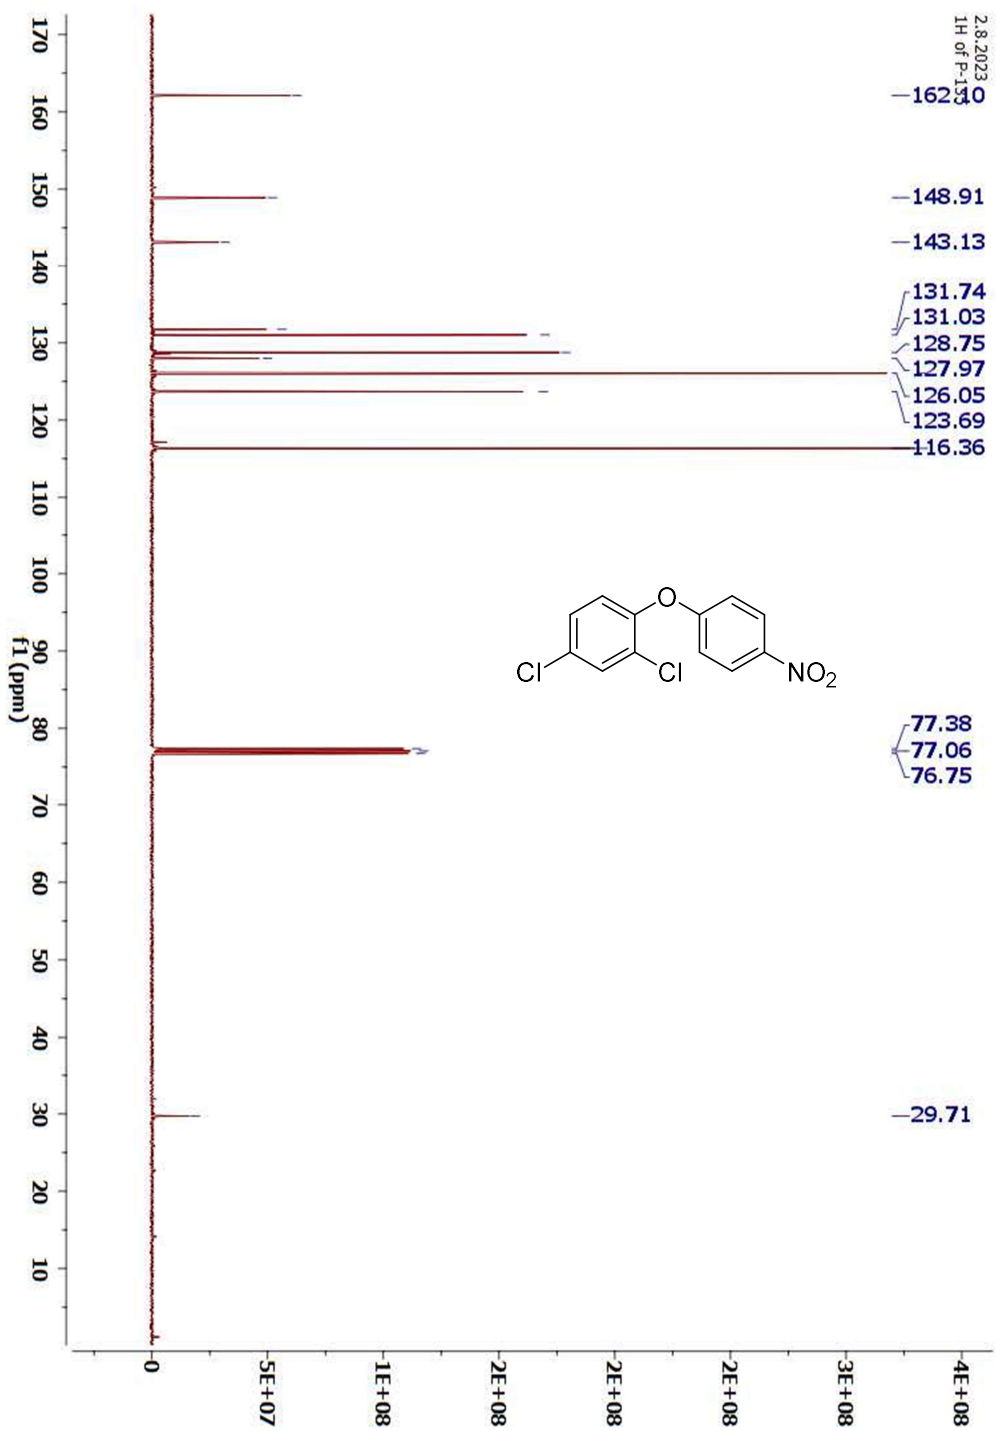

## IR Spectra of New Compounds

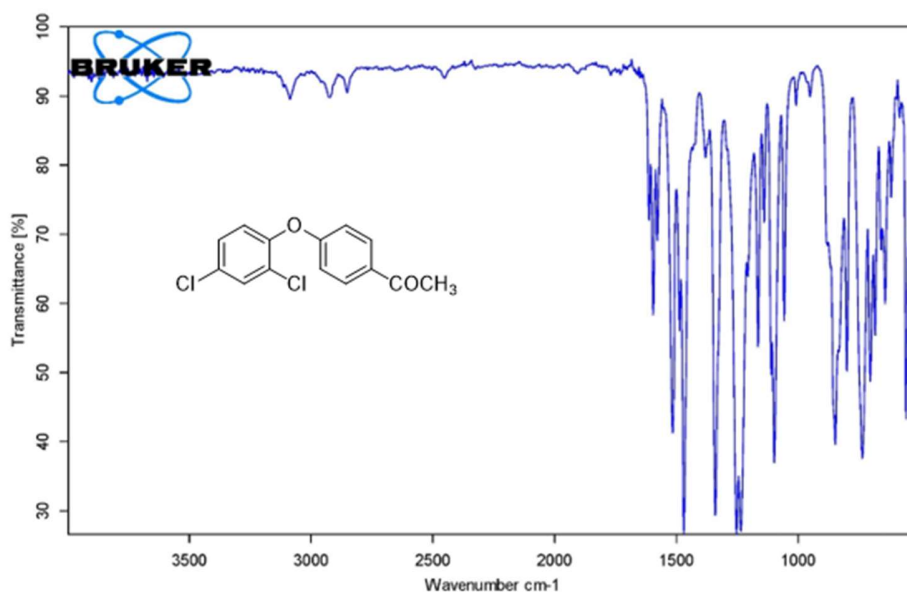

|                                                                    |              |                                    |            |
|--------------------------------------------------------------------|--------------|------------------------------------|------------|
| E:\Official\FTR demo\BERHAMPUR UNIVERSITY CHEMISTRY\Sample H LIQ.0 | Sample H LIQ | Instrument type and / or accessory | 24-08-2023 |
|--------------------------------------------------------------------|--------------|------------------------------------|------------|

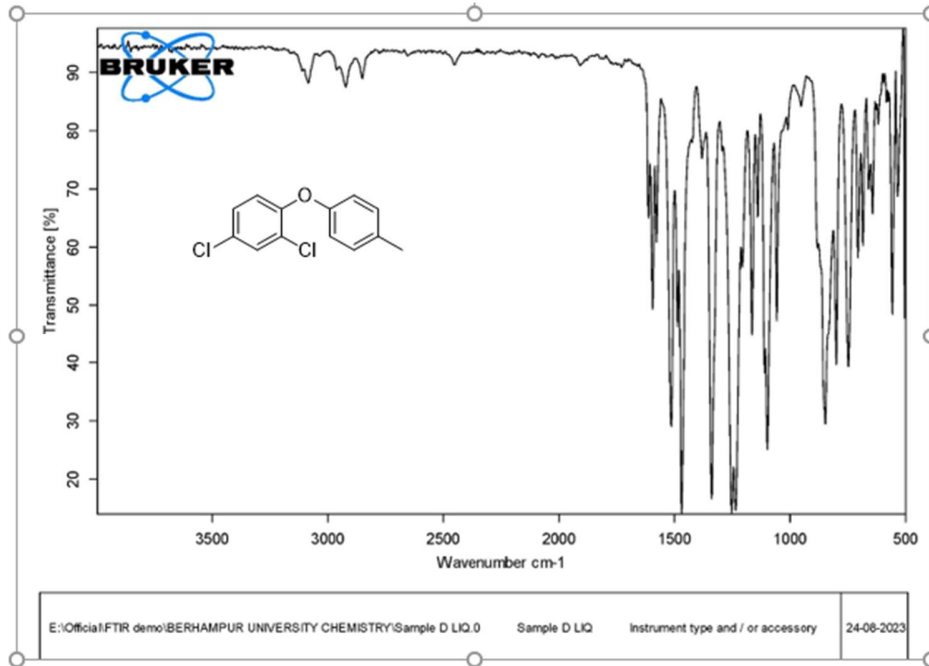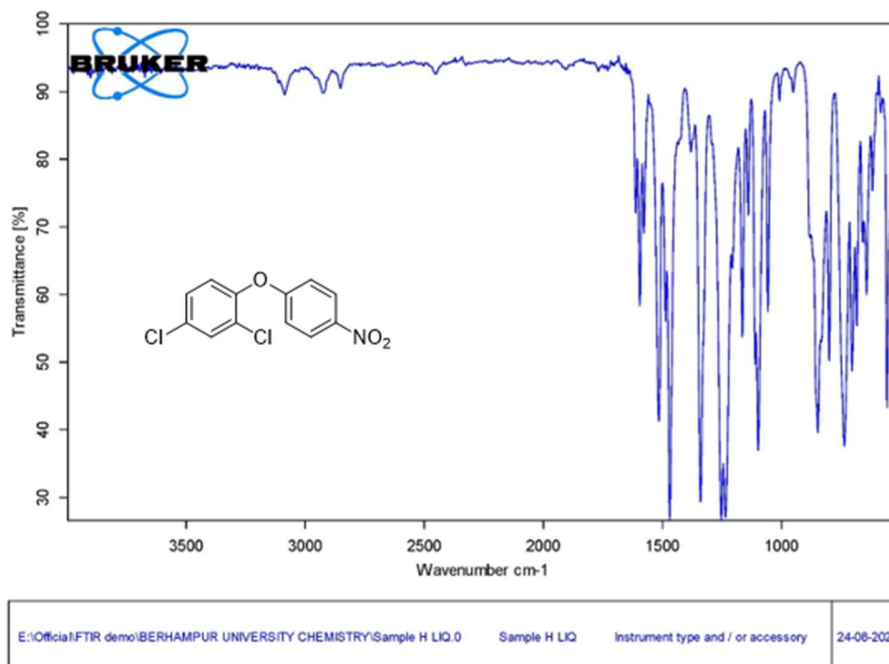

**IR Data:** The Recycle procedure follow as per the reported journal; *Chem. Eur. J.* 2020, **24**, 620-624.

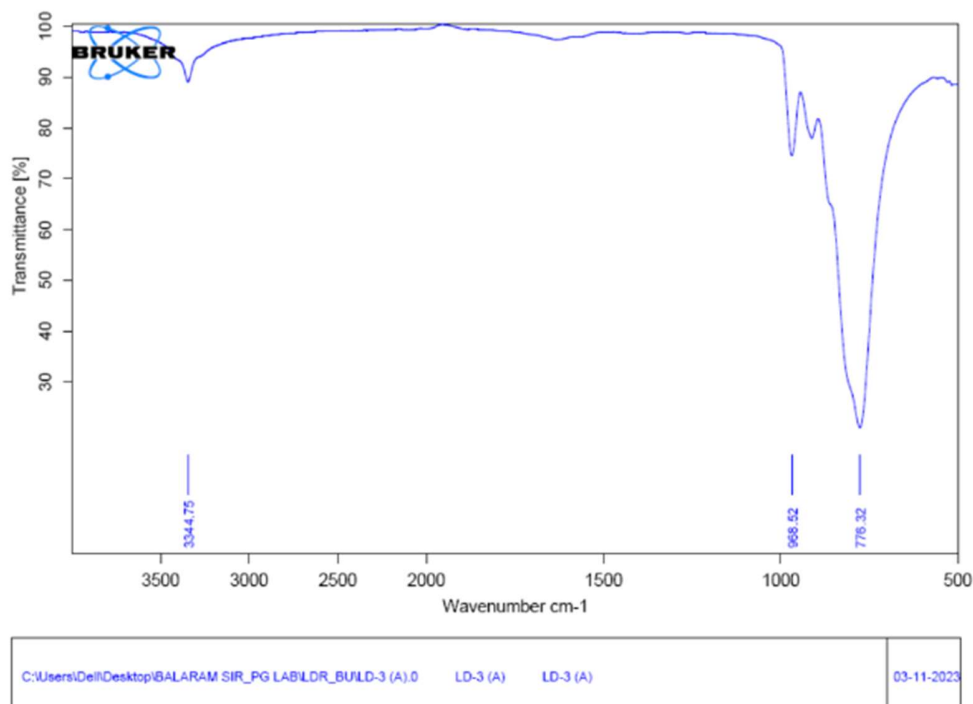

*Figure – 1 : IR Data of Original  $\text{CuMoO}_4$  Catalyst*

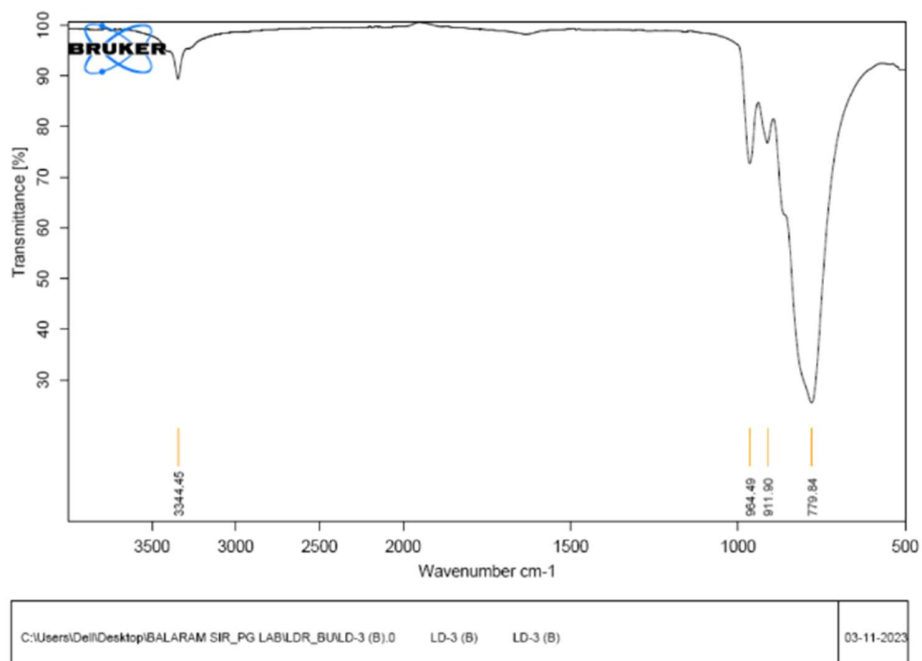

*Figure – 1 : IR Data of Recovered  $\text{CuMoO}_4$  Catalyst*
